# Supplementary material
Source: publisher figshare collection journal article supplement (https://gsajournals.figshare.com/ndownloader/files/25271222)
Supplement: Supplementary file 1 [file 25271222]

,ORF Name,baseMean,log2FoldChange,lfcSE,stat,pvalue,padj,SGD ID,Gene Name,Gene Length,Verified ORF?,Chromosome,Start,End,Strand,Description
1,YAL012W,3917.778044,-1.973059524,0.242113737,-8.153992173,3.52E-16,2.22E-15,S000000010,CYS3,1185,Verified,chrI,130799,131983,1,Cystathionine gamma-lyase; catalyzes one of the two reactions involved in the transsulfuration pathway that yields cysteine from homocysteine with the intermediary formation of cystathionine; protein abundance increases in response to DNA replication stress
2,YAL019W,634.9776844,-1.022505848,0.100887359,-10.13442389,3.89E-24,3.69E-23,S000000017,FUN30,3396,Verified,chrI,114919,118314,1,"Snf2p family member with ATP-dependent chromatin remodeling activity; has a role in silencing at the mating type locus, telomeres and centromeres; enriched at centromeres and is required for correct chromatin structure around centromeres, as well as at the boundary element of the silent HMR; recruited to DNA double-strand breaks (DSBs) where it promotes 5' strand resection of DSBs; potential Cdc28p substrate"
3,YAL025C,293.6122409,-2.359343033,0.180191306,-13.05548704,5.91E-39,1.06E-37,S000000023,MAK16,921,Verified,chrI,100225,101145,-1,Essential nuclear protein; constituent of 66S pre-ribosomal particles; required for maturation of 25S and 5.8S rRNAs; required for maintenance of M1 satellite double-stranded RNA of the L-A virus
4,YAL035W,3464.683297,-1.642644144,0.136593936,-12.02547081,2.61E-33,3.79E-32,S000000033,FUN12,3009,Verified,chrI,76427,79435,1,Translation initiation factor eIF5B; GTPase that promotes Met-tRNAiMet binding to ribosomes and ribosomal subunit joining; promotes GTP-dependent maturation of 18S rRNA by Nob1p; protein abundance increases in response to DNA replication stress; homolog of bacterial IF2
5,YAL036C,754.581941,-1.577420824,0.107317632,-14.69442077,7.00E-49,1.73E-47,S000000034,RBG1,1110,Verified,chrI,75043,76152,-1,"Member of the DRG family of GTP-binding proteins; associates with translating ribosomes; interacts with Tma46p, Ygr250cp, Gir2p and Yap1p via two-hybrid"
6,YAL040C,1034.547437,-1.266065894,0.119434923,-10.60026066,2.97E-26,3.16E-25,S000000038,CLN3,1743,Verified,chrI,65778,67520,-1,"G1 cyclin involved in cell cycle progression; activates Cdc28p kinase to promote G1 to S phase transition; plays a role in regulating transcription of other G1 cyclins, CLN1 and CLN2; regulated by phosphorylation and proteolysis; acetyl-CoA induces CLN3 transcription in response to nutrient repletion to promote cell-cycle entry; cell cycle arrest phenotype of the cln1 cln2 cln3 triple null mutant is complemented by any of human cyclins CCNA2, CCNB1, CCNC, CCND1, or CCNE1"
7,YAL053W,1593.448949,-1.283758017,0.090397799,-14.20164415,8.95E-46,2.00E-44,S000000049,FLC2,2352,Verified,chrI,45899,48250,1,"Putative calcium channel involved in calcium release under hypotonic stress; required for uptake of FAD into endoplasmic reticulum; involved in cell wall maintenance; FLC2 has a paralog, YOR365C, that arose from the whole genome duplication"
8,YAL059W,150.4601338,-1.795458153,0.152265222,-11.75315392,6.80E-32,9.31E-31,S000000055,ECM1,639,Verified,chrI,36509,37147,1,Pre-ribosomal factor involved in 60S ribosomal protein subunit export; associates with the pre-60S particle; shuttles between the nucleus and cytoplasm
9,YAR008W,90.48474987,-1.301975806,0.170097599,-7.63294047,2.29E-14,1.28E-13,S000000066,SEN34,828,Verified,chrI,158966,159793,1,"Subunit of the tRNA splicing endonuclease; tRNA splicing endonuclease (Sen complex) is composed of Sen2p, Sen15p, Sen34p, and Sen54p; Sen complex also cleaves the CBP1 mRNA at the mitochondrial surface; Sen34p contains the active site for tRNA 3' splice site cleavage and has similarity to Sen2p and to Archaeal tRNA splicing endonuclease"
10,YAR071W,1198.650377,-2.193590655,0.203625065,-10.76298607,5.15E-27,5.72E-26,S000000094,PHO11,1404,Verified,chrI,225460,226863,1,"One of three repressible acid phosphatases; glycoprotein that is transported to the cell surface by the secretory pathway; induced by phosphate starvation and coordinately regulated by PHO4 and PHO2; PHO11 has a paralog, PHO12, that arose from a segmental duplication"
11,YBL004W,1392.562151,-2.047596913,0.120705114,-16.95988543,1.63E-64,6.36E-63,S000000100,UTP20,7482,Verified,chrII,227636,235117,1,Component of the small-subunit (SSU) processome; SSU processome is involved in the biogenesis of the 18S rRNA
12,YBL009W,335.8480991,-1.11877769,0.107545813,-10.39852845,2.52E-25,2.52E-24,S000000105,ALK2,2031,Verified,chrII,207194,209224,1,"Protein kinase; along with its paralog, ALK1, required for proper spindle positioning and nuclear segregation following mitotic arrest, proper organization of cell polarity factors in mitosis, proper localization of formins and polarity factors, and survival in cells that activate spindle assembly checkpoint; phosphorylated in response to DNA damage; ALK2 has a paralog, ALK1, that arose from the whole genome duplication; similar to mammalian haspins"
13,YBL015W,342.6142502,-1.116290945,0.127572264,-8.74854753,2.16E-18,1.55E-17,S000000111,ACH1,1581,Verified,chrII,194122,195702,1,Protein with CoA transferase activity; particularly for CoASH transfer from succinyl-CoA to acetate; has minor acetyl-CoA-hydrolase activity; phosphorylated; required for acetate utilization and for diploid pseudohyphal growth
14,YBL024W,967.2142965,-1.336127039,0.093224546,-14.33003314,1.42E-46,3.21E-45,S000000120,NCL1,2055,Verified,chrII,172534,174588,1,"S-adenosyl-L-methionine-dependent tRNA: m5C-methyltransferase; methylates cytosine to m5C at several positions in tRNAs and intron-containing pre-tRNAs; increases proportion of tRNALeu(CAA) with m5C at wobble position in response to hydrogen peroxide, causing selective translation of mRNA from genes enriched in TTG codon; loss of NCL1 confers hypersensitivity to oxidative stress; similar to Nop2p and human proliferation associated nucleolar protein p120"
15,YBL028C,154.6665822,-1.950413741,0.202346073,-9.608370149,7.37E-22,6.28E-21,S000000124,YBL028C,321,Verified,chrII,167518,167838,-1,Protein of unknown function that may interact with ribosomes; green fluorescent protein (GFP)-fusion protein localizes to the nucleolus; predicted to be involved in ribosome biogenesis
16,YBL030C,4019.153578,-1.30215659,0.144490193,-9.012274001,2.02E-19,1.52E-18,S000000126,PET9,957,Verified,chrII,163041,163997,-1,"Major ADP/ATP carrier of the mitochondrial inner membrane; exchanges cytosolic ADP for mitochondrially synthesized ATP; also imports heme and ATP; required for viability in many lab strains that carry a sal1 mutation; PET9 has a paralog, AAC3, that arose from the whole genome duplication; human homolog SLC25A4 implicated in progressive external ophthalmoplegia can complement yeast null mutant"
17,YBL035C,274.1115467,-1.022731076,0.095535238,-10.70003978,1.02E-26,1.12E-25,S000000131,POL12,2118,Verified,chrII,151493,153610,-1,B subunit of DNA polymerase alpha-primase complex; required for initiation of DNA replication during mitotic and premeiotic DNA synthesis; also functions in telomere capping and length regulation
18,YBL039C,1431.922201,-3.518184779,0.187137949,-18.78004405,1.10E-78,6.31E-77,S000000135,URA7,1740,Verified,chrII,143989,145728,-1,"Major CTP synthase isozyme (see also URA8); catalyzes the ATP-dependent transfer of the amide nitrogen from glutamine to UTP, forming CTP, the final step in de novo biosynthesis of pyrimidines; involved in phospholipid biosynthesis; capable of forming cytoplasmic filaments termed cytoophidium, especially during conditions of glucose depletion; URA7 has a paralog, URA8, that arose from the whole genome duplication"
19,YBL042C,733.1027327,-3.754235968,0.114628176,-32.62714318,1.69E-233,3.52E-230,S000000138,FUI1,1920,Verified,chrII,138341,140260,-1,"High affinity uridine permease, localizes to the plasma membrane; also mediates low but significant transport of the cytotoxic nucleoside analog 5-fluorouridine; not involved in uracil transport; relative distribution to the vacuole increases upon DNA replication stress"
20,YBL054W,323.7788458,-3.330503144,0.134093313,-24.49989798,1.48E-132,4.21E-130,S000000150,TOD6,1578,Verified,chrII,117589,119166,1,PAC motif binding protein involved in rRNA and ribosome biogenesis; subunit of the RPD3L histone deacetylase complex; Myb-like HTH transcription factor; hypophosphorylated by rapamycin treatment in a Sch9p-dependent manner; activated in stochastic pulses of nuclear localization
21,YBL081W,537.6202616,-1.593992203,0.122762096,-12.97948806,1.60E-38,2.80E-37,S000000177,YBL081W,1107,Uncharacterized,chrII,71866,72972,1,Non-essential protein of unknown function; null mutation results in a decrease in plasma membrane electron transport
22,YBR021W,310.3416817,-2.616882642,0.223978293,-11.65791487,2.09E-31,2.81E-30,S000000225,FUR4,1902,Verified,chrII,281443,283344,1,Plasma membrane localized uracil permease; expression is tightly regulated by uracil levels and environmental cues; conformational alterations induced by unfolding or substrate binding result in Rsp5p-mediated ubiquitination and degradation
23,YBR029C,1459.161557,-1.081793849,0.135915722,-7.960293493,1.72E-15,1.04E-14,S000000233,CDS1,1374,Verified,chrII,296369,297742,-1,"Phosphatidate cytidylyltransferase (CDP-diglyceride synthetase); an enzyme that catalyzes that conversion of CTP + phosphate into diphosphate + CDP-diaclglyerol, a critical step in the synthesis of all major yeast phospholipids; human homolog CDS1 can complement yeast cds1 null mutant"
24,YBR034C,938.3760627,-2.133912652,0.133748558,-15.94764439,2.96E-57,9.34E-56,S000000238,HMT1,1047,Verified,chrII,304930,305976,-1,"Nuclear SAM-dependent mono- and asymmetric methyltransferase; modifies hnRNPs, including Npl3p and Hrp1p, affecting their activity and nuclear export; methylates U1 snRNP protein Snp1p, ribosomal protein Rps2p, and histones H3 and H4; interacts genetically with genes encoding components of Rpd3(L) and this interaction is important for Rpd3 recruitment to the subtelomeric region"
25,YBR061C,246.0680192,-1.256656972,0.119845466,-10.47769382,1.09E-25,1.14E-24,S000000265,TRM7,933,Verified,chrII,364787,365719,-1,"2'-O-ribose methyltransferase; methylates the 2'-O-ribose of tRNA-Phe, tRNA-Trp, and tRNA-Leu at positions C32 and N34 of tRNA anticodon loop; crucial biological role likely modification of tRNA-Phe; interacts with Trm732p and Rtt10p in 2'-O-methylation of C32 and N34 substrate tRNAs, respectively; yeast null mutant can be functionally complemented by human FTSJ1, mutations in which have been implicated in nonsyndromic X-linked intellectual disability (NSXLID)"
26,YBR069C,2157.809579,-1.275401915,0.142650943,-8.940168321,3.89E-19,2.91E-18,S000000273,TAT1,1860,Verified,chrII,376574,378433,-1,"Amino acid transporter for valine, leucine, isoleucine, and tyrosine; low-affinity tryptophan and histidine transporter; overexpression confers FK506 and FTY720 resistance; protein abundance increases in response to DNA replication stress"
27,YBR079C,2402.440078,-1.344820278,0.06472635,-20.77591801,7.15E-96,7.57E-94,S000000283,RPG1,2895,Verified,chrII,395383,398277,-1,eIF3a subunit of the eukaryotic translation initiation factor 3 (eIF3); subunit of the core complex of eIF3; essential for translation; part of a Prt1p-Rpg1p-Nip1p subcomplex that stimulates binding of mRNA and tRNA(i)Met to ribosomes; involved in translation reinitiation; eIF3 is also involved in programmed stop codon readthrough
28,YBR084W,1791.548699,-1.411085425,0.080639057,-17.49721605,1.50E-68,6.58E-67,S000000288,MIS1,2928,Verified,chrII,411054,413981,1,"Mitochondrial C1-tetrahydrofolate synthase; involved in interconversion between different oxidation states of tetrahydrofolate (THF); provides activities of formyl-THF synthetase, methenyl-THF cyclohydrolase, and methylene-THF dehydrogenase"
29,YBR085W,110.6083458,-1.062295103,0.180855001,-5.866139484,4.46E-09,1.61E-08,S000000289,AAC3,924,Verified,chrII,415983,416906,1,"Mitochondrial inner membrane ADP/ATP translocator; exchanges cytosolic ADP for mitochondrially synthesized ATP; expressed under anaerobic conditions; similar to Aac1p; has roles in maintenance of viability and in respiration; AAC3 has a paralog, PET9, that arose from the whole genome duplication"
30,YBR088C,357.1633524,-2.200838712,0.198848167,-11.05182902,2.15E-28,2.53E-27,S000000292,POL30,777,Verified,chrII,424990,425766,-1,Proliferating cell nuclear antigen (PCNA); functions as the sliding replication clamp for DNA polymerase delta; may function as a docking site for other proteins required for mitotic and meiotic chromosomal DNA replication and for DNA repair; PCNA ubiquitination at K164 plays a crucial role during Okazaki fragment processing
31,YBR089W,61.08566199,-2.376523486,0.230879711,-10.12042925,4.48E-24,4.23E-23,S000000293,YBR089W,600,Dubious,chrII,425183,425782,1,"Dubious open reading frame; unlikely to encode a functional protein, based on available experimental and comparative sequence data; almost completely overlaps the verified gene POL30"
32,YBR092C,2124.483811,-2.956206536,0.19503543,-15.15481448,7.04E-52,1.88E-50,S000000296,PHO3,1404,Verified,chrII,427698,429101,-1,"Constitutively expressed acid phosphatase similar to Pho5p; brought to the cell surface by transport vesicles; hydrolyzes thiamin phosphates in the periplasmic space, increasing cellular thiamin uptake; expression is repressed by thiamin"
33,YBR093C,2593.487351,-2.685296474,0.159621679,-16.81724174,1.82E-63,6.91E-62,S000000297,PHO5,1404,Verified,chrII,429548,430951,-1,Repressible acid phosphatase; 1 of 3 repressible acid phosphatases that also mediates extracellular nucleotide-derived phosphate hydrolysis; secretory pathway derived cell surface glycoprotein; induced by phosphate starvation and coordinately regulated by PHO4 and PHO2
34,YBR142W,476.6734558,-2.414023694,0.126340556,-19.07006168,4.48E-81,2.89E-79,S000000346,MAK5,2322,Verified,chrII,528317,530638,1,Essential nucleolar protein; putative DEAD-box RNA helicase required for maintenance of M1 dsRNA virus; involved in biogenesis of large (60S) ribosomal subunits
35,YBR155W,224.1394098,-1.808110948,0.169181976,-10.66923536,1.42E-26,1.54E-25,S000000359,CNS1,1158,Verified,chrII,549771,550928,1,"TPR-containing co-chaperone; binds both Hsp82p (Hsp90) and Ssa1p (Hsp70); stimulates ATPase activity of Ssa1p; ts mutants reduce Hsp82p function, overexpression suppresses phenotypes of HSP82 ts allele and cpr7 deletion; human homolog TTC4 complements yeast cns1 mutant"
36,YBR172C,785.1728175,-1.067493387,0.111480571,-9.575469408,1.01E-21,8.56E-21,S000000376,SMY2,2223,Verified,chrII,579150,581372,-1,"GYF domain protein; involved in COPII vesicle formation; interacts with the Sec23p/Sec24p subcomplex; overexpression suppresses the temperature sensitivity of a myo2 mutant; similar to S. pombe Mpd2; SMY2 has a paralog, SYH1, that arose from the whole genome duplication"
37,YBR191W-A,26.78275254,-1.211941858,0.288511668,-4.168709339,3.06E-05,7.44E-05,S000007594,YBR191W-A,75,Dubious,chrII,607149,607223,1,"Dubious open reading frame; unlikely to encode a functional protein, based on available experimental and comparative sequence data"
38,YBR213W,70.49345103,-1.118243614,0.223188168,-5.006425108,5.55E-07,1.64E-06,S000000417,MET8,825,Verified,chrII,650368,651192,1,"Bifunctional dehydrogenase and ferrochelatase; involved in the biosynthesis of siroheme, a prosthetic group used by sulfite reductase; required for sulfate assimilation and methionine biosynthesis"
39,YBR238C,620.0271967,-2.78146896,0.190719534,-14.56580253,4.64E-48,1.11E-46,S000000442,YBR238C,2196,Verified,chrII,695107,697302,-1,"Mitochondrial membrane protein; not required for respiratory growth but causes a synthetic respiratory defect in combination with rmd9 mutations; transcriptionally up-regulated by TOR; deletion increases life span; YBR238C has a paralog, RMD9, that arose from the whole genome duplication"
40,YBR242W,199.7468397,-1.003423015,0.11642221,-8.613638474,7.08E-18,4.89E-17,S000000446,YBR242W,717,Uncharacterized,chrII,704670,705386,1,"Putative protein of unknown function; green fluorescent protein (GFP)-fusion protein localizes to the cytoplasm and nucleus; YBR242W is not an essential gene; YBR242W has a paralog, YGL101W, that arose from the whole genome duplication"
41,YBR247C,411.5037934,-2.703758066,0.161498274,-16.69655521,1.39E-62,5.17E-61,S000000451,ENP1,1452,Verified,chrII,713004,714455,-1,Protein associated with U3 and U14 snoRNAs; required for pre-rRNA processing and 40S ribosomal subunit synthesis; localized in the nucleus and concentrated in the nucleolus; human BYSL functionally complements the heat sensitivity of an enp1 ts mutant
42,YBR267W,306.0500697,-2.225494039,0.126222663,-17.57408276,3.89E-69,1.76E-67,S000000471,REI1,1182,Verified,chrII,739841,741022,1,"Cytoplasmic pre-60S factor; required for the correct recycling of shuttling factors Alb1, Arx1 and Tif6 at the end of the ribosomal large subunit biogenesis; involved in bud growth in the mitotic signaling network"
43,YBR271W,189.9683906,-1.617646275,0.13737685,-11.75318963,6.80E-32,9.31E-31,S000000475,EFM2,1260,Verified,chrII,744852,746111,1,S-adenosylmethionine-dependent methyltransferase; seven-beta-strand lysine methyltransferase which dimethylates translation elongation factor EF2 (Eft1p and Eft2p) at lysine 613 and methylates EF3 (Yef3p) at lysine 187; green fluorescent protein (GFP)-fusion protein localizes to the cytoplasm; involved in regulation of translational termination; predicted involvement in ribosome biogenesis
44,YBR296C,575.3389869,-3.002868732,0.140975433,-21.1843762,1.33E-99,1.63E-97,S000000500,PHO89,1725,Verified,chrII,796798,798522,-1,Plasma membrane Na+/Pi cotransporter; active in early growth phase; similar to phosphate transporters of Neurospora crassa; transcription regulated by inorganic phosphate concentrations and Pho4p; mutations in related human transporter genes hPit1 and hPit2 are associated with hyperphosphatemia-induced calcification of vascular tissue and familial idiopathic basal ganglia calcification
45,YCL014W,622.6150988,-1.0468902,0.10257969,-10.20434265,1.90E-24,1.82E-23,S000000520,BUD3,4911,Verified,chrIII,96281,101191,1,"Guanine nucleotide exchange factor (GEF) for Cdc42p; activates Cdc42p in early G1, accounting for the first stage of biphasic activation, with Cdc24p accounting for the second stage in late G1; involved in the Cdc42p-mediated assembly of the axial landmark that dictates the site for the next round of budding, resulting in the axial budding pattern observed in haploids; localizes with septins to the bud neck contractile ring in mitosis"
46,YCL036W,165.1188519,-3.815483682,0.187582105,-19.49388881,1.24E-84,8.79E-83,S000000541,GFD2,1701,Verified,chrIII,59026,60726,1,"Protein of unknown function; identified as a high-copy suppressor of a dbp5 mutation; GFD2 has a paralog, YDR514C, that arose from the whole genome duplication"
47,YCL037C,523.6972829,-1.894789623,0.113647728,-16.65955803,2.58E-62,9.54E-61,S000000542,SRO9,1305,Verified,chrIII,57374,58678,-1,"Cytoplasmic RNA-binding protein; shuttles between nucleus and cytoplasm and is exported from the nucleus in an mRNA export-dependent manner; associates with translating ribosomes; involved in heme regulation of Hap1p as a component of the HMC complex, also involved in the organization of actin filaments; contains a La motif; SRO9 has a paralog, SLF1, that arose from the whole genome duplication"
48,YCL054W,641.2839846,-2.751375747,0.148263218,-18.51990993,1.43E-76,7.82E-75,S000000559,SPB1,2526,Verified,chrIII,31449,33974,1,"AdoMet-dependent methyltransferase; involved in rRNA processing and 60S ribosomal subunit maturation; methylates G2922 in the tRNA docking site of the large subunit rRNA and in the absence of snR52, U2921; suppressor of PAB1 mutants"
49,YCL058W-A,28.3228413,-2.264130868,0.407333402,-5.387499669,7.14E-08,2.30E-07,S000028518,ADF1,342,Verified,chrIII,23584,23925,1,Transcriptional repressor encoded by the FYV5 antisense strand; negatively regulates transcription of FYV5 by binding to the promoter on the sense strand
50,YCL059C,317.8368745,-2.089686961,0.152768649,-13.65337649,1.93E-42,3.89E-41,S000000564,KRR1,951,Verified,chrIII,22429,23379,-1,Nucleolar protein required for rRNA synthesis and ribosomal assembly; required for the synthesis of 18S rRNA and for the assembly of 40S ribosomal subunit; essential gene
51,YCL061C,298.9319055,-1.103019754,0.117266755,-9.402824336,5.31E-21,4.29E-20,S000000566,MRC1,3291,Verified,chrIII,18816,22106,-1,"S-phase checkpoint protein required for DNA replication; couples DNA helicase and polymerase; interacts with and stabilizes Pol2p at stalled replication forks during stress, where it forms a pausing complex with Tof1p and is phosphorylated by Mec1p; defines a novel S-phase checkpoint with Hog1p that coordinates DNA replication and transcription upon osmostress; protects uncapped telomeres; Dia2p-dependent degradation mediates checkpoint recovery; mammalian claspin homolog"
52,YCR016W,191.2797901,-1.305041475,0.202242529,-6.451564926,1.11E-10,4.65E-10,S000000609,YCR016W,873,Uncharacterized,chrIII,143634,144506,1,Putative protein of unknown function; green fluorescent protein (GFP)-fusion protein localizes to the nucleolus and nucleus; predicted to be involved in ribosome biogenesis
53,YCR034W,1826.149486,-1.393716535,0.141635292,-9.84011389,7.56E-23,6.80E-22,S000000630,ELO2,1044,Verified,chrIII,190592,191635,1,"Fatty acid elongase, involved in sphingolipid biosynthesis; acts on fatty acids of up to 24 carbons in length; mutations have regulatory effects on 1,3-beta-glucan synthase, vacuolar ATPase, and the secretory pathway; ELO2 has a paralog, ELO1, that arose from the whole genome duplication; lethality of the elo2 elo3 double null mutation is functionally complemented by human ELOVL1 and weakly complemented by human ELOVL3 or ELOV7"
54,YCR047C,317.7282075,-1.342892373,0.107447353,-12.48971122,8.50E-36,1.35E-34,S000000643,BUD23,828,Verified,chrIII,210718,211545,-1,Methyltransferase that methylates residue G1575 of 18S rRNA; required for rRNA processing and nuclear export of 40S ribosomal subunits independently of methylation activity; diploid mutant displays random budding pattern; functional homolog of human WBSCR22
55,YCR057C,898.6504284,-2.642018801,0.0948224,-27.82399977,2.22E-170,1.74E-167,S000000653,PWP2,2772,Verified,chrIII,220457,223228,-1,"Conserved 90S pre-ribosomal component; essential for proper endonucleolytic cleavage of the 35 S rRNA precursor at A0, A1, and A2 sites; contains eight WD-repeats; PWP2 deletion leads to defects in cell cycle and bud morphogenesis"
56,YCR072C,407.364626,-2.83852546,0.134663559,-20.98637323,8.74E-98,1.01E-95,S000000668,RSA4,1548,Verified,chrIII,240805,242352,-1,"Ribosomal large subunit (60S) assembly factor; association of the N-terminal ubiquitin-like (UBL) domain of this preribosomal factor with the MIDAS domain in the Rea1p tail, promoted by the GTPase Nog2p, is required for the ATP-dependent dissociation of preribosomal factors including the Rix1p subcomplex, Rea1p, Nog2p and Rsa1p itself prior to nuclear export of pre-60S particles; contains WD-repeats and a UBL domain; localizes to the nucleolus "
57,YCR087C-A,78.39041335,-2.038729183,0.213586741,-9.452484525,3.31E-21,2.70E-20,S000007223,YCR087C-A,462,Uncharacterized,chrIII,264006,264467,-1,Putative protein of unknown function; green fluorescent protein (GFP)-fusion protein localizes to the nucleolus; YCR087C-A is not an essential gene
58,YCR087W,41.86011435,-2.164774536,0.243994494,-8.643053573,5.47E-18,3.80E-17,S000000683,YCR087W,516,Dubious,chrIII,263976,264491,1,"Dubious open reading frame; unlikely to encode a functional protein, based on available experimental and comparative sequence data; partially overlaps uncharacterized gene YCR087C-A; YCR087W is not an essential gene"
59,YDL003W,186.1299887,-1.868010327,0.140355537,-13.2734174,3.30E-40,6.23E-39,S000002161,MCD1,1701,Verified,chrIV,444683,446383,1,"Essential alpha-kleisin subunit of the cohesin complex; required for sister chromatid cohesion in mitosis; subject to proteolytic cleavage by separate Esp1p, resulting in dissociation of cohesin from chromatin and the separation of sister chromatids at the mitotic metaphase-to-anaphase transition; apoptosis induces cleavage and translocation of a C-terminal fragment to mitochondria; expression peaks in S phase"
60,YDL014W,3888.542035,-2.170914858,0.171892235,-12.63022988,1.44E-36,2.33E-35,S000002172,NOP1,984,Verified,chrIV,427364,428347,1,"Histone glutamine methyltransferase, modifies H2A at Q105 in nucleolus; component of the small subunit processome complex, which is required for processing of pre-18S rRNA; ortholog of mammalian fibrillarin; inviability of the null mutant is functionally complemented by human FBL"
61,YDL031W,724.7704332,-2.237010232,0.112047176,-19.94625899,1.62E-88,1.33E-86,S000002189,DBP10,2988,Verified,chrIV,394217,397204,1,Putative ATP-dependent RNA helicase of the DEAD-box protein family; constituent of 66S pre-ribosomal particles; essential protein involved in ribosome biogenesis
62,YDL037C,157.8900825,-2.981246608,0.231114748,-12.76197271,2.67E-37,4.43E-36,S000002195,BSC1,987,Verified,chrIV,384601,385587,-1,"Protein of unconfirmed function; similar to cell surface flocculin Flo11p; ORF exhibits genomic organization compatible with a translational readthrough-dependent mode of expression; in W303 strain one continuous open reading frame comprising of YDL037C, the intergenic region and YDL039C encodes the gene IMI1"
63,YDL039C,334.2558024,-2.905453408,0.188106292,-15.38659564,2.01E-53,5.80E-52,S000002197,PRM7,2097,Verified,chrIV,381985,384081,-1,"Pheromone-regulated protein; predicted to have one transmembrane segment; promoter contains Gcn4p binding elements; in W303 strain one continuous open reading frame comprising of YDL037C, the intergenic region and YDL039C encodes the IMI1"
64,YDL042C,219.8843365,-1.33038296,0.103255286,-12.8697863,6.66E-38,1.13E-36,S000002200,SIR2,1689,Verified,chrIV,376757,378445,-1,"Conserved NAD+ dependent histone deacetylase of the Sirtuin family; deacetylation targets are primarily nuclear proteins; required for telomere hypercluster formation in quiescent yeast cells; involved in regulation of lifespan; plays roles in silencing at HML, HMR, telomeres, and rDNA; negatively regulates initiation of DNA replication; functions as regulator of autophagy like mammalian homolog SIRT1, and also of mitophagy"
65,YDL048C,658.2634761,-1.738646188,0.138010383,-12.5927629,2.31E-36,3.72E-35,S000002206,STP4,1473,Verified,chrIV,366739,368211,-1,"Protein containing a Kruppel-type zinc-finger domain; similar to Stp1p, Stp2p; predicted transcription factor; relative distribution to the nucleus increases upon DNA replication stress; STP4 has a paralog, STP3, that arose from the whole genome duplication"
66,YDL050C,37.91180141,-1.477596177,0.249150793,-5.875560824,4.21E-09,1.53E-08,S000002208,YDL050C,372,Dubious,chrIV,364446,364817,-1,"Dubious open reading frame; unlikely to encode a functional protein, based on available experimental and comparative sequence data"
67,YDL051W,545.306147,-1.831726557,0.140417231,-13.03733989,7.50E-39,1.34E-37,S000002209,LHP1,828,Verified,chrIV,363952,364779,1,RNA binding protein required for maturation of tRNA and U6 snRNA; acts as a molecular chaperone for RNAs transcribed by polymerase III; homologous to human La (SS-B) autoantigen
68,YDL055C,10560.48224,-1.397158984,0.174510026,-8.004760878,1.20E-15,7.34E-15,S000002213,PSA1,1086,Verified,chrIV,355674,356759,-1,GDP-mannose pyrophosphorylase (mannose-1-phosphate guanyltransferase); synthesizes GDP-mannose from GTP and mannose-1-phosphate in cell wall biosynthesis; required for normal cell wall structure
69,YDL060W,566.6045688,-2.31128359,0.122002759,-18.91962466,7.86E-80,4.87E-78,S000002218,TSR1,2367,Verified,chrIV,341619,343985,1,Protein required for processing of 20S pre-rRNA in the cytoplasm; associates with pre-40S ribosomal particles; inhibits the premature association of 60S subunits with assembling 40S subunits in the cytoplasm; similar to Bms1p; relocalizes from nucleus to cytoplasm upon DNA replication stress
70,YDL062W,45.56506149,-2.749659507,0.262479113,-9.892732124,4.48E-23,4.06E-22,S000002220,YDL062W,426,Dubious,chrIV,339857,340282,1,"Dubious open reading frame; unlikely to encode a functional protein, based on available experimental and comparative sequence data; partially overlaps uncharacterized ORF YDL063C; YDL062W is not essential"
71,YDL063C,382.7062151,-3.285818093,0.138464375,-23.53240918,1.90E-122,4.57E-120,S000002221,SYO1,1863,Verified,chrIV,338272,340134,-1,Transport adaptor or symportin; facilitates synchronized nuclear coimport of the two 5S-rRNA binding proteins Rpl5p and Rpl11p; binds to nascent Rpl5p during translation; required for biogenesis of the large ribosomal subunit; green fluorescent protein (GFP)-fusion protein localizes to the cytoplasm and nucleus
72,YDL102W,444.1088917,-1.185699585,0.081633697,-14.51904477,9.18E-48,2.18E-46,S000002260,POL3,3294,Verified,chrIV,276872,280165,1,"Catalytic subunit of DNA polymerase delta; required for chromosomal DNA replication during mitosis and meiosis, intragenic recombination, repair of double strand DNA breaks, and DNA replication during nucleotide excision repair (NER)"
73,YDL105W,70.10205137,-1.036479139,0.16675993,-6.20173023,5.58E-10,2.21E-09,S000002263,NSE4,1209,Verified,chrIV,272389,273597,1,Component of the SMC5-SMC6 complex; this complex plays a key role in the removal of X-shaped DNA structures that arise between sister chromatids during DNA replication and repair
74,YDL111C,477.7156817,-1.009264159,0.090697152,-11.12549869,9.43E-29,1.13E-27,S000002269,RRP42,798,Verified,chrIV,263313,264110,-1,Exosome non-catalytic core component; involved in 3'-5' RNA processing and degradation in both the nucleus and the cytoplasm; has similarity to E. coli RNase PH and to human hRrp42p (EXOSC7)
75,YDL112W,992.2132904,-1.250870299,0.098674768,-12.67529613,8.11E-37,1.33E-35,S000002270,TRM3,4311,Verified,chrIV,258915,263225,1,2'-O-ribose methyltransferase; catalyzes the ribose methylation of the guanosine nucleotide at position 18 of tRNAs
76,YDL122W,898.3510111,-1.161952618,0.086118428,-13.49115202,1.76E-41,3.43E-40,S000002280,UBP1,2430,Verified,chrIV,242552,244981,1,Ubiquitin-specific protease; removes ubiquitin from ubiquitinated proteins; cleaves at the C terminus of ubiquitin fusions irrespective of their size; capable of cleaving polyubiquitin chains
77,YDL129W,106.241759,-1.334945263,0.174923159,-7.616228249,2.61E-14,1.46E-13,S000002287,YDL129W,876,Verified,chrIV,231024,231899,1,Protein of unknown function; green fluorescent protein (GFP)-fusion protein localizes to the cytoplasm and the nucleus; YDL129W is not an essential gene; relative distribution to the nucleus increases upon DNA replication stress
78,YDL148C,490.6988943,-2.739036641,0.160305546,-17.0427797,3.95E-65,1.56E-63,S000002307,NOP14,2433,Verified,chrIV,188154,190586,-1,"Nucleolar protein; forms a complex with Noc4p that mediates maturation and nuclear export of 40S ribosomal subunits; also present in the small subunit processome complex, which is required for processing of pre-18S rRNA"
79,YDL150W,253.45194,-1.898358507,0.150035984,-12.62858775,1.47E-36,2.37E-35,S000002309,RPC53,1269,Verified,chrIV,183343,184611,1,RNA polymerase III subunit C53
80,YDL151C,17.41567406,-1.731862777,0.371487681,-4.501917227,6.73E-06,1.76E-05,S000002310,BUD30,582,Dubious,chrIV,183318,183899,-1,"Dubious open reading frame; unlikely to encode a functional protein, based on available experimental and comparative sequence data; not conserved in closely related Saccharomyces species; 96% of ORF overlaps the verified gene RPC53; diploid mutant displays a weak budding pattern phenotype in a systematic assay"
81,YDL152W,18.15010498,-1.895296113,0.356122802,-5.067944405,4.02E-07,1.20E-06,S000002311,YDL152W,366,Dubious,chrIV,182822,183187,1,"Dubious open reading frame; unlikely to encode a functional protein, based on available experimental and comparative sequence data; partially overlaps the verified ORF SAS10/YDL153C, a component of the small ribosomal subunit processosome"
82,YDL153C,374.719502,-2.62056911,0.184754559,-14.14666192,1.96E-45,4.33E-44,S000002312,SAS10,1833,Verified,chrIV,181186,183018,-1,Subunit of U3-containing Small Subunit (SSU) processome complex; involved in production of 18S rRNA and assembly of small ribosomal subunit; disrupts silencing when overproduced; mutant has increased aneuploidy tolerance; essential gene
83,YDL164C,411.8550689,-1.123852968,0.087743164,-12.80372003,1.56E-37,2.62E-36,S000002323,CDC9,2268,Verified,chrIV,164987,167254,-1,"DNA ligase I found in nucleus and mitochondria; essential enzyme that joins Okazaki fragments during DNA replication; also acts in ribonucleotide excision repair, base excision repair, and recombination; DNA ligase I mutants trigger ubiquitination of PCNA at K107, facilitating Rad59p-mediated bypass of unligated Okazaki fragments; human homolog LIG1 can complement yeast cdc9 temperature-sensitive mutant at restrictive temperature"
84,YDL167C,595.1210955,-1.661365788,0.091673261,-18.11254599,2.54E-73,1.27E-71,S000002326,NRP1,2160,Verified,chrIV,160995,163154,-1,Putative RNA binding protein of unknown function; localizes to stress granules induced by glucose deprivation; predicted to be involved in ribosome biogenesis
85,YDL201W,303.3118284,-1.377007264,0.118686149,-11.59417452,4.41E-31,5.83E-30,S000002360,TRM8,861,Verified,chrIV,99561,100421,1,Catalytic subunit of a tRNA methyltransferase complex; Trm8p and Trm82p comprise an enzyme that catalyzes a methyl-transfer from S-adenosyl-l-methionine to the N(7) atom of guanine at position 46 in tRNA; Trm8 lacks catalytic activity if not bound to Trm82p
86,YDL208W,526.2952813,-1.195017739,0.137270875,-8.703495374,3.22E-18,2.26E-17,S000002367,NHP2,471,Verified,chrIV,87512,87982,1,"Protein related to mammalian high mobility group (HMG) proteins; nuclear protein; essential for function of H/ACA-type snoRNPs, which are involved in 18S rRNA processing"
87,YDL209C,110.1929049,-1.128381414,0.152046573,-7.410783403,1.26E-13,6.66E-13,S000002368,CWC2,1020,Verified,chrIV,86207,87226,-1,"Member of the NineTeen Complex (NTC); this complex contains Prp19p and stabilizes U6 snRNA in catalytic forms of the spliceosome containing U2, U5, and U6 snRNAs; binds directly to U6 snRNA; similar to S. pombe Cwf2"
88,YDL213C,232.6681082,-1.671167065,0.195895296,-8.524078399,1.54E-17,1.04E-16,S000002372,NOP6,678,Verified,chrIV,77289,77966,-1,rRNA-binding protein required for 40S ribosomal subunit biogenesis; contains an RNA recognition motif (RRM); hydrophilin essential to overcome the stress of the desiccation-rehydration process; NOP6 may be a fungal-specific gene as no homologs have been yet identified in higher eukaryotes
89,YDL227C,221.670581,-2.27222484,0.120858632,-18.7325358,2.69E-78,1.53E-76,S000002386,HO,1761,Verified,chrIV,46271,48031,-1,"Site-specific endonuclease; required for gene conversion at the MAT locus (homothallic switching) through the generation of a ds DNA break; expression restricted to mother cells in late G1 as controlled by Swi4p-Swi6p, Swi5p, and Ash1p"
90,YDL228C,560.9004957,-1.280028391,0.176454469,-7.25312073,4.07E-13,2.06E-12,S000002387,YDL228C,642,Dubious,chrIV,45277,45918,-1,"Dubious open reading frame; unlikely to encode a functional protein, based on available experimental and comparative sequence data; almost completely overlaps the verified gene SSB1"
91,YDL229W,23056.10817,-1.401587931,0.152613279,-9.184370986,4.14E-20,3.23E-19,S000002388,SSB1,1842,Verified,chrIV,44065,45906,1,"Cytoplasmic ATPase that is a ribosome-associated molecular chaperone; functions with J-protein partner Zuo1p; may be involved in folding of newly-made polypeptide chains; member of the HSP70 family; interacts with phosphatase subunit Reg1p; SSB1 has a paralog, SSB2, that arose from the whole genome duplication"
92,YDR021W,95.06581722,-2.200087886,0.206637724,-10.5167066,7.24E-26,7.58E-25,S000002428,FAL1,1200,Verified,chrIV,486804,488003,1,Nucleolar protein required for maturation of 18S rRNA; member of the eIF4A subfamily of DEAD-box ATP-dependent RNA helicases; 18S rRNA biogenesis defect of the null mutant is functionally complemented by human EIF4A3
93,YDR044W,634.7605494,-1.393542441,0.175294678,-7.947951461,1.90E-15,1.15E-14,S000002451,HEM13,987,Verified,chrIV,546642,547628,1,Coproporphyrinogen III oxidase; oxygen-requiring enzyme that catalyzes sixth step in heme biosynthetic pathway; transcription is repressed by oxygen and heme (via Rox1p and Hap1p); human homolog CPOX can complement yeast mutant and allow growth of haploid null after sporulation of a heterozygous diploid
94,YDR060W,968.2999195,-2.504577159,0.138490869,-18.07205254,5.29E-73,2.63E-71,S000002467,MAK21,3078,Verified,chrIV,570649,573726,1,Constituent of 66S pre-ribosomal particles; required for large (60S) ribosomal subunit biogenesis; acts as part of a Mak21p-Noc2p-Rrp5p module that associates with nascent pre-rRNA during transcription and has a role in bigenesis of the large ribosomal subunit; involved in nuclear export of pre-ribosomes; required for maintenance of dsRNA virus; homolog of human CAATT-binding protein
95,YDR083W,257.9944237,-2.275771735,0.164849387,-13.76604128,4.08E-43,8.53E-42,S000002490,RRP8,1179,Verified,chrIV,612073,613251,1,Nucleolar S-adenosylmethionine-dependent rRNA methyltransferase; methylates adenine (m1A) of the large subunit (LSU) rRNA at position 645; involved in pre-rRNA cleavage at site A2; mutation is synthetically lethal with a gar1 mutation; deletion disrupts telomere maintenance by influencing the expression of neighboring gene STN1
96,YDR087C,223.0183197,-1.637489328,0.142975418,-11.43532341,2.78E-30,3.54E-29,S000002494,RRP1,837,Verified,chrIV,617470,618306,-1,Essential evolutionarily conserved nucleolar protein; necessary for biogenesis of 60S ribosomal subunits and for processing of pre-rRNAs to mature rRNA; associated with several distinct 66S pre-ribosomal particles
97,YDR091C,1782.792583,-1.445594132,0.125430243,-11.52425865,9.96E-31,1.29E-29,S000002498,RLI1,1827,Verified,chrIV,626708,628534,-1,"Essential Fe-S protein; required for ribosome biogenesis, translation initiation/termination; facilitates binding of multifactor complex (MFC) of initiation factors to small ribosomal subunit; Dom34-Hbs1 complex and Rli1p work in dissociating inactive ribosomes, thereby facilitating translation restart; forms complex with Lto1p and Yae1p; dependency on ROS-labile FeS clusters, activity in nuclear ribosomal-subunit export impaired by mild oxidative stress"
98,YDR097C,394.9753104,-1.946046014,0.118249816,-16.43572139,1.06E-60,3.81E-59,S000002504,MSH6,3729,Verified,chrIV,640109,643837,-1,Protein required for mismatch repair in mitosis and meiosis; forms a complex with Msh2p to repair both single-base & insertion-deletion mispairs; also involved in interstrand cross-link repair; potentially phosphorylated by Cdc28p
99,YDR101C,1016.441623,-2.596882251,0.137753042,-18.8381092,3.68E-79,2.17E-77,S000002508,ARX1,1782,Verified,chrIV,655686,657467,-1,Nuclear export factor for the ribosomal pre-60S subunit; shuttling factor which directly binds FG rich nucleoporins and facilities translocation through the nuclear pore complex; interacts directly with Alb1p; responsible for Tif6p recycling defects in the absence of Rei1; associated with the ribosomal export complex
100,YDR120C,678.4995806,-1.534890464,0.087351151,-17.5649273,4.57E-69,2.06E-67,S000002527,TRM1,1713,Verified,chrIV,691549,693261,-1,"tRNA methyltransferase; two forms of protein are made by alternative translation starts; localizes to both nucleus and mitochondrion to produce modified base N2,N2-dimethylguanosine in tRNAs in both compartments; nuclear Trm1p is evenly distributed around inner nuclear membrane in WT, but mislocalizes as puncta near ER-nucleus junctions in spindle pole body (SPB) mutants; both Trm1p inner nuclear membrane targeting and maintenance depend upon SPB"
101,YDR144C,890.6915189,-1.570614697,0.138371033,-11.34870934,7.53E-30,9.43E-29,S000002551,MKC7,1791,Verified,chrIV,744311,746101,-1,"GPI-anchored aspartyl protease; member of the yapsin family of proteases involved in cell wall growth and maintenance; shares functions with Yap3p and Kex2p; MKC7 has a paralog, YPS1, that arose from the whole genome duplication"
102,YDR157W,25.72216321,-1.099760748,0.27842585,-3.930627854,8.47E-05,0.000196039,S000002564,YDR157W,402,Uncharacterized,chrIV,769931,770332,1,Putative protein of unknown function; conserved across S. cerevisiae strains
103,YDR161W,314.8295812,-1.724791551,0.115584381,-14.90262698,3.17E-50,8.12E-49,S000002568,ACL4,1164,Verified,chrIV,779043,780206,1,Specific assembly chaperone for ribosomal protein Rpl4p; binds to an evolutionarily conserved surface extension of nascent Rpl4p and chaperones Rpl4p until its assembly into the pre-ribosome; transcriptionally co-regulated with rRNA and ribosome biosynthesis genes
104,YDR165W,524.8991267,-1.689535594,0.117741742,-14.34136256,1.21E-46,2.73E-45,S000002572,TRM82,1335,Verified,chrIV,784871,786205,1,Noncatalytic subunit of a tRNA methyltransferase complex; Trm8p and Trm82p comprise an enzyme that catalyzes a methyl-transfer from S-adenosyl-l-methionine to the N(7) atom of guanine at position 46 in tRNA; Trm8 lacks catalytic activity if not bound to Trm82p; relocalizes to the cytosol in response to hypoxia; mutation in human ortholog WDR4 causes microcephalic primordial dwarfism
105,YDR172W,1689.290125,-1.114858177,0.082547555,-13.50497071,1.46E-41,2.87E-40,S000002579,SUP35,2058,Verified,chrIV,808324,810381,1,"Translation termination factor eRF3; has a role in mRNA deadenylation and decay; altered protein conformation creates the [PSI(+)] prion that modifies cellular fitness, alters translational fidelity by affecting reading frame selection, and results in a nonsense suppressor phenotype; many stress-response genes are repressed in the presence of [PSI(+)]"
106,YDR184C,178.7831089,-2.002618225,0.151701057,-13.1498709,1.70E-39,3.12E-38,S000002592,ATC1,885,Verified,chrIV,830629,831513,-1,Nuclear protein; possibly involved in regulation of cation stress responses and/or in the establishment of bipolar budding pattern; relative distribution to the nucleus decreases upon DNA replication stress
107,YDR190C,826.6611291,-1.171506287,0.106308059,-11.01881042,3.10E-28,3.62E-27,S000002598,RVB1,1392,Verified,chrIV,840604,841995,-1,"ATP-dependent DNA helicase, also known as pontin; member of the AAA+ and RuvB-like protein families; similar to Rvb2p; conserved component of multiple complexes including the INO80 complex, the Swr1 complex, and the R2TP complex (Rvb1-Rvb2-Tah1-Pih1); involved in multiple processes such as chromatin remodeling, box C/D snoRNP assembly, and RNA polymerase II assembly"
108,YDR215C,12.4925896,-1.181143208,0.364479175,-3.202131655,0.001364146,0.002654417,S000002623,YDR215C,414,Uncharacterized,chrIV,894089,894502,-1,Putative protein of unknown function; conserved across S. cerevisiae strains; null mutant displays elevated sensitivity to expression of a mutant huntingtin fragment or of alpha-synuclein
109,YDR216W,788.8517029,-1.261958906,0.118494952,-10.64820645,1.78E-26,1.93E-25,S000002624,ADR1,3972,Verified,chrIV,895035,899006,1,"Carbon source-responsive zinc-finger transcription factor; required for transcription of the glucose-repressed gene ADH2, of peroxisomal protein genes, and of genes required for ethanol, glycerol, and fatty acid utilization"
110,YDR281C,148.1541915,-2.407695212,0.183009496,-13.06209227,5.42E-39,9.74E-38,S000002689,PHM6,315,Verified,chrIV,1022007,1022321,-1,Protein of unknown function; expression is regulated by phosphate levels
111,YDR299W,308.7226151,-2.813102464,0.176157604,-15.88350312,8.24E-57,2.58E-55,S000002707,BFR2,1605,Verified,chrIV,1059627,1061231,1,Component of the SSU and 90S preribosomes; involved in pre-18S rRNA processing; binds to U3 snoRNA and Mpp10p; multicopy suppressor of sensitivity to Brefeldin A; expression is induced during lag phase and also by cold shock
112,YDR312W,207.6623164,-1.206012388,0.166224634,-7.252580555,4.09E-13,2.07E-12,S000002720,SSF2,1362,Verified,chrIV,1087581,1088942,1,"Protein required for ribosomal large subunit maturation; functionally redundant with Ssf1p; member of the Brix family; SSF2 has a paralog, SSF1, that arose from the whole genome duplication"
113,YDR321W,1632.886185,-1.26489603,0.120950686,-10.45759234,1.35E-25,1.39E-24,S000002729,ASP1,1146,Verified,chrIV,1108702,1109847,1,"Cytosolic L-asparaginase, involved in asparagine catabolism; catalyzes hydrolysis of L-asparagine to aspartic acid and ammonia; important enzyme for the treatment of acute lymphoblastic leukemia; has low glutaminase activity and dependence; synthesized constitutively"
114,YDR324C,633.0218142,-2.09811834,0.102666914,-20.41587224,1.21E-92,1.11E-90,S000002732,UTP4,2331,Verified,chrIV,1114433,1116763,-1,Subunit of U3-containing 90S preribosome and SSU processome complexes; involved in production of 18S rRNA and assembly of small ribosomal subunit; member of t-Utp subcomplex involved with transcription of 35S rRNA transcript; Small Subunit processome is also known as SSU processome
115,YDR342C,1964.715074,-3.654597316,0.190639391,-19.15329041,9.09E-82,5.98E-80,S000002750,HXT7,1713,Verified,chrIV,1154216,1155928,-1,"High-affinity glucose transporter; member of the major facilitator superfamily, nearly identical to Hxt6p, expressed at high basal levels relative to other HXTs, expression repressed by high glucose levels; HXT7 has a paralog, HXT4, that arose from the whole genome duplication"
116,YDR361C,280.5657788,-1.985049667,0.165032698,-12.00879029,3.19E-33,4.61E-32,S000002769,BCP1,852,Verified,chrIV,1195412,1196263,-1,"Essential protein involved in nuclear export of Mss4p; Mss4p is a lipid kinase that generates phosphatidylinositol 4,5-biphosphate and plays a role in actin cytoskeleton organization and vesicular transport"
117,YDR365C,577.9527976,-1.779147308,0.180169623,-9.871363085,5.54E-23,5.00E-22,S000002773,ESF1,1887,Verified,chrIV,1204497,1206383,-1,Nucleolar protein involved in pre-rRNA processing; depletion causes severely decreased 18S rRNA levels
118,YDR395W,1570.749791,-1.278892303,0.079267705,-16.13252162,1.51E-58,5.09E-57,S000002803,SXM1,2835,Verified,chrIV,1263324,1266158,1,"Nuclear transport factor (karyopherin); involved in protein transport between the cytoplasm and nucleoplasm; similar to Nmd5p, Cse1p, Lph2p, and the human cellular apoptosis susceptibility protein, CAS1"
119,YDR396W,58.37250954,-1.070943358,0.216840451,-4.927651528,8.32E-07,2.42E-06,S000002804,YDR396W,501,Dubious,chrIV,1266295,1266795,1,Dubious open reading frame unlikely to encode a functional protein; extensively overlaps essential NCB2 gene encoding the beta subunit of the NC2 dimeric histone-fold complex
120,YDR398W,690.9618667,-2.776972728,0.136459486,-20.31205818,1.01E-91,8.98E-90,S000002806,UTP5,1932,Verified,chrIV,1267471,1269402,1,Subunit of U3-containing Small Subunit (SSU) processome complex; involved in production of 18S rRNA and assembly of small ribosomal subunit
121,YDR399W,842.8684182,-2.526767441,0.163871483,-15.40761001,1.45E-53,4.23E-52,S000002807,HPT1,666,Verified,chrIV,1270068,1270733,1,Dimeric hypoxanthine-guanine phosphoribosyltransferase; catalyzes the transfer of the phosphoribosyl portion of 5-phosphoribosyl-alpha-1-pyrophosphate to a purine base (either guanine or hypoxanthine) to form pyrophosphate and a purine nucleotide (either guanosine monophosphate or inosine monophosphate); mutations in the human homolog HPRT1 can cause Lesch-Nyhan syndrome and Kelley-Seegmiller syndrome
122,YDR412W,199.2445462,-1.766980182,0.166332899,-10.60320321,2.88E-26,3.07E-25,S000002820,RRP17,708,Verified,chrIV,1294693,1295400,1,Component of the pre-60S pre-ribosomal particle; required for cell viability under standard (aerobic) conditions but not under anaerobic conditions; exonuclease required for 5' end processing of pre-60S ribosomal RNA
123,YDR413C,12.4767657,-1.570702876,0.371456875,-4.080832685,4.49E-05,0.000106919,S000002821,YDR413C,576,Dubious,chrIV,1294836,1295411,-1,"Dubious open reading frame; unlikely to encode a functional protein, based on available experimental and comparative sequence data; overlaps the essential uncharacterized ORF YDR412W that is implicated in rRNA processing"
124,YDR429C,996.7838957,-1.221735758,0.115263167,-10.59829724,3.03E-26,3.22E-25,S000002837,TIF35,825,Verified,chrIV,1324477,1325301,-1,eIF3g subunit of the eukaryotic translation initiation factor 3 (eIF3); subunit of the core complex of eIF3; is essential for translation; stimulates resumption of ribosomal scanning during translation reinitiation; eIF3 is also involved in programmed stop codon readthrough
125,YDR441C,319.0456403,-1.253310032,0.119923141,-10.4468861,1.51E-25,1.55E-24,S000002849,APT2,546,Verified,chrIV,1344517,1345062,-1,"Potential adenine phosphoribosyltransferase; encodes a protein with similarity to adenine phosphoribosyltransferase, but artificially expressed protein exhibits no enzymatic activity; APT2 has a paralog, APT1, that arose from the whole genome duplication"
126,YDR449C,273.2792721,-2.410417021,0.130240002,-18.42900688,7.69E-76,4.18E-74,S000002857,UTP6,1323,Verified,chrIV,1357580,1358902,-1,Nucleolar protein; component of the small subunit (SSU) processome containing the U3 snoRNA that is involved in processing of pre-18S rRNA
127,YDR465C,420.3650122,-2.608952574,0.14437383,-18.0201312,1.35E-72,6.61E-71,S000002873,RMT2,1239,Verified,chrIV,1393336,1394574,-1,Arginine N5 methyltransferase; methylates ribosomal protein Rpl12 (L12) on Arg67; relative distribution to the nucleus increases upon DNA replication stress
128,YDR491C,95.72607438,-2.493563289,0.207815583,-11.74406589,7.58E-32,1.03E-30,S000002899,YDR491C,492,Dubious,chrIV,1434500,1434991,-1,"Dubious open reading frame; unlikely to encode a functional protein, based on available experimental and comparative sequence data"
129,YDR492W,690.269875,-2.634060613,0.104201277,-25.21117462,3.02E-140,1.35E-137,S000002900,IZH1,951,Verified,chrIV,1434924,1435874,1,"Membrane protein involved in zinc ion homeostasis; member of the four-protein IZH family; transcription is regulated directly by Zap1p, expression induced by zinc deficiency and fatty acids; deletion increases sensitivity to elevated zinc; IZH1 has a paralog, IZH4, that arose from the whole genome duplication"
130,YDR496C,598.3947014,-2.578828695,0.147190623,-17.49435925,1.58E-68,6.87E-67,S000002904,PUF6,1971,Verified,chrIV,1441433,1443403,-1,"Pumilio-homology domain protein; binds the 3' UTR of ASH1 mRNA and represses its translation, resulting in proper asymmetric localization of ASH1 mRNA; required at post-transcriptional step for efficient retrotransposition; absence results in decreased Ty1 Gag:GFP protein levels; co-sediments with the 60S ribosomal subunit and is required for its biogenesis"
131,YDR502C,3410.670146,-2.831213289,0.247163273,-11.47346658,1.79E-30,2.30E-29,S000002910,SAM2,1155,Verified,chrIV,1453310,1454464,-1,S-adenosylmethionine synthetase; catalyzes transfer of the adenosyl group of ATP to the sulfur atom of methionine; comparative analysis suggests that a mitochondrially targeted form may result from translation starting at a non-canonical codon upstream of the annotated start codon
132,YDR507C,684.1658818,-1.099230683,0.080334943,-13.6810414,1.32E-42,2.69E-41,S000002915,GIN4,3429,Verified,chrIV,1462358,1465786,-1,"Protein kinase involved in bud growth and assembly of the septin ring; proposed to have kinase-dependent and kinase-independent activities; undergoes autophosphorylation; similar to Hsl1p; GIN4 has a paralog, KCC4, that arose from the whole genome duplication"
133,YDR514C,141.8826649,-1.453015235,0.155435763,-9.328808741,1.07E-20,8.56E-20,S000002922,YDR514C,1452,Verified,chrIV,1471548,1472999,-1,"Protein of unknown function that localizes to mitochondria; overexpression affects endocytic protein trafficking; YDR514C has a paralog, GFD2, that arose from the whole genome duplication"
134,YEL026W,2038.055444,-1.9546101,0.160387518,-12.18639032,3.67E-34,5.55E-33,S000000752,SNU13,381,Verified,chrV,101943,102323,1,"RNA binding protein; part of U3 snoRNP involved in rRNA processing, part of U4/U6-U5 tri-snRNP involved in mRNA splicing, similar to human 15.5K protein"
135,YEL033W,310.9771775,-1.907233083,0.176913925,-10.76920519,4.81E-27,5.35E-26,S000000759,MTC7,420,Uncharacterized,chrV,86179,86598,1,"Protein of unknown function; predicted metabolic role based on network analysis derived from ChIP experiments, a large-scale deletion study and localization of transcription factor binding sites; null mutant is sensitive to temperature oscillation in a cdc13-1 mutant"
136,YEL034C-A,3612.773986,-1.705945781,0.135666082,-12.57310542,2.97E-36,4.75E-35,S000028743,YEL034C-A,603,Dubious,chrV,85613,86215,-1,"Dubious open reading frame; unlikely to encode a functional protein, based on available experimental and comparative sequence data; completely overlaps HYP2/YEL034W, a verified gene that encodes eiF-5A"
137,YEL034W,2810.397049,-1.782410995,0.182085388,-9.78676193,1.28E-22,1.14E-21,S000000760,HYP2,474,Verified,chrV,85676,86149,1,"Translation elongation factor eIF-5A; required for translation of proteins containing polyproline stretches, including Bni1p, and this leads to a requirement for mating projection formation; structural homolog of bacterial EF-P; undergoes an essential hypusination modification; HYP2 has a paralog, ANB1, that arose from the whole genome duplication; human EIF5A complements the inviability of the yeast hyp2 anb1 double null mutant"
138,YEL040W,3553.20889,-1.277193762,0.094929449,-13.45382092,2.92E-41,5.68E-40,S000000766,UTR2,1404,Verified,chrV,78053,79456,1,Chitin transglycosylase; functions in the transfer of chitin to beta(1-6) and beta(1-3) glucans in the cell wall; similar to and functionally redundant with Crh1; glycosylphosphatidylinositol (GPI)-anchored protein localized to bud neck
139,YEL042W,2006.082434,-1.415999756,0.135674464,-10.4362187,1.69E-25,1.72E-24,S000000768,GDA1,1557,Verified,chrV,73771,75327,1,"Guanosine diphosphatase located in the Golgi; involved in the transport of GDP-mannose into the Golgi lumen, converting GDP to GMP after mannose is transferred to substrates; null mutants are defective in sporulation and pre-meiotic S phase entry; orthologous to human ENTPD6, a meiosis-associated non-obstructive azoospermia (NOA) related gene identified in GWAS studies"
140,YEL054C,3373.873392,-1.110998541,0.110831808,-10.02380676,1.20E-23,1.10E-22,S000000780,RPL12A,498,Verified,chrV,52721,53218,-1,"Ribosomal 60S subunit protein L12A; rpl12a rpl12b double mutant exhibits slow growth and slow translation; homologous to mammalian ribosomal protein L12 and bacterial L11; RPL12A has a paralog, RPL12B, that arose from the whole genome duplication"
141,YEL055C,1030.215224,-1.105977287,0.063530213,-17.40655158,7.36E-68,3.09E-66,S000000781,POL5,3069,Verified,chrV,48471,51539,-1,"DNA Polymerase phi; has sequence similarity to the human MybBP1A and weak sequence similarity to B-type DNA polymerases, not required for chromosomal DNA replication; required for the synthesis of rRNA"
142,YER001W,862.0844499,-1.727343567,0.0987186,-17.49191776,1.65E-68,7.12E-67,S000000803,MNN1,2289,Verified,chrV,153520,155808,1,"Alpha-1,3-mannosyltransferase; integral membrane glycoprotein of the Golgi complex, required for addition of alpha1,3-mannose linkages to N-linked and O-linked oligosaccharides, one of five S. cerevisiae proteins of the MNN1 family"
143,YER002W,225.6704392,-1.742688318,0.225922535,-7.708111065,1.28E-14,7.28E-14,S000000804,NOP16,696,Verified,chrV,156803,157498,1,Constituent of 66S pre-ribosomal particles; involved in 60S ribosomal subunit biogenesis
144,YER006W,769.0323243,-2.752025883,0.142202649,-19.3267811,3.20E-83,2.15E-81,S000000808,NUG1,1563,Verified,chrV,162723,164285,1,GTPase that associates with nuclear 60S pre-ribosomes; required for export of 60S ribosomal subunits from the nucleus
145,YER011W,235.5461102,-1.76435342,0.18856714,-9.336524651,9.95E-21,7.97E-20,S000000813,TIR1,765,Verified,chrV,175248,176012,1,Cell wall mannoprotein; expression is downregulated at acidic pH and induced by cold shock and anaerobiosis; abundance is increased in cells cultured without shaking; member of the Srp1p/Tip1p family of serine-alanine-rich proteins
146,YER025W,2421.547379,-1.315209153,0.139454874,-9.430508366,4.08E-21,3.32E-20,S000000827,GCD11,1584,Verified,chrV,205251,206834,1,Gamma subunit of the translation initiation factor eIF2; involved in the identification of the start codon; binds GTP when forming the ternary complex with GTP and tRNAi-Met; mutations in human ortholog cause X-linked intellectual disability (XLID)
147,YER036C,3078.891702,-1.796327674,0.13691372,-13.11918048,2.56E-39,4.65E-38,S000000838,ARB1,1833,Verified,chrV,223367,225199,-1,"ATPase of the ATP-binding cassette (ABC) family; involved in 40S and 60S ribosome biogenesis, has similarity to Gcn20p; shuttles from nucleus to cytoplasm, physically interacts with Tif6p, Lsg1p; human homolog ABCF2 can complement yeast ARB1 mutant"
148,YER042W,207.5784982,-1.939439306,0.224507247,-8.621786271,6.59E-18,4.57E-17,S000000844,MXR1,555,Verified,chrV,234937,235491,1,Methionine-S-sulfoxide reductase; involved in the response to oxidative stress; protects iron-sulfur clusters from oxidative inactivation along with MXR2; involved in the regulation of lifespan; reduced activity of human homolog implicated in Alzheimer disease
149,YER043C,9112.248748,-1.453443693,0.166914023,-8.709779145,3.04E-18,2.15E-17,S000000845,SAH1,1350,Verified,chrV,235770,237119,-1,S-adenosyl-L-homocysteine hydrolase; catabolizes S-adenosyl-L-homocysteine which is formed after donation of the activated methyl group of S-adenosyl-L-methionine (AdoMet) to an acceptor; regulates cellular lipid homoeostasis by regulating phosphatidylcholine(PC)synthesis and triacylglycerol (TG) levels
150,YER070W,2348.679301,-2.656025373,0.230132016,-11.53775681,8.51E-31,1.11E-29,S000000872,RNR1,2667,Verified,chrV,298950,301616,1,"Major isoform of large subunit of ribonucleotide-diphosphate reductase; the RNR complex catalyzes rate-limiting step in dNTP synthesis, regulated by DNA replication and DNA damage checkpoint pathways via localization of small subunits; relative distribution to the nucleus increases upon DNA replication stress; RNR1 has a paralog, RNR3, that arose from the whole genome duplication"
151,YER072W,3593.031653,-1.015304366,0.117325445,-8.652993164,5.02E-18,3.48E-17,S000000874,VTC1,390,Verified,chrV,302806,303195,1,"Regulatory subunit of the vacuolar transporter chaperone (VTC) complex; VTC complex is involved in membrane trafficking, vacuolar polyphosphate accumulation, microautophagy and non-autophagic vacuolar fusion; also has mRNA binding activity; protein abundance increases in response to DNA replication stress"
152,YER075C,349.7122067,-1.186675968,0.110414852,-10.74317471,6.38E-27,7.07E-26,S000000877,PTP3,2787,Verified,chrV,308413,311199,-1,Phosphotyrosine-specific protein phosphatase; major role in the pheromone adaptive response through dephosphorylation of the Fus3p MAPK with a minor role by Ptp2p and Msg5p; minor role in the inactivation of Hog1p MAPK during osmolarity sensing with major role by Ptp2p; dephosphorylates and regulates the localization of Hog1p; minor role in the cell wall integrity pathway through tyrosine dephosphorylation of the MAPK Slt2p while Ptp2p plays a major role; localizes to the cytoplasm
153,YER082C,427.0520034,-2.125133916,0.099608088,-21.28923023,1.43E-100,1.79E-98,S000000884,UTP7,1665,Verified,chrV,324272,325936,-1,Nucleolar protein; component of the small subunit (SSU) processome containing the U3 snoRNA that is involved in processing of pre-18S rRNA
154,YER110C,3325.785301,-2.312858492,0.155944343,-14.83099209,9.24E-50,2.31E-48,S000000912,KAP123,3342,Verified,chrV,378762,382103,-1,"Karyopherin beta; mediates nuclear import of ribosomal proteins prior to assembly into ribosomes and import of histones H3 and H4; localizes to the nuclear pore, nucleus, and cytoplasm; exhibits genetic interactions with RAI1"
155,YER118C,502.788795,-1.059098409,0.098096768,-10.79399699,3.67E-27,4.10E-26,S000000920,SHO1,1104,Verified,chrV,397952,399055,-1,"Transmembrane osmosensor for filamentous growth and HOG pathways; involved in activation of the Cdc42p- and MAP kinase-dependent filamentous growth pathway and the high-osmolarity glycerol (HOG) response pathway; phosphorylated by Hog1p; interacts with Pbs2p, Msb2p, Hkr1p, and Ste11p"
156,YER126C,414.7036535,-2.103292205,0.153783948,-13.66063259,1.74E-42,3.53E-41,S000000928,NSA2,786,Verified,chrV,413394,414179,-1,"Protein constituent of 66S pre-ribosomal particles; contributes to processing of the 27S pre-rRNA; recruited by ribosomal proteins L17, L35, and L37 to assembling ribosomes after 27SB pre-rRNA is generated, immediately preceding removal of ITS2"
157,YER127W,251.5806823,-2.122858798,0.162816385,-13.00255596,1.18E-38,2.09E-37,S000000929,LCP5,1074,Verified,chrV,414481,415554,1,Essential protein involved in maturation of 18S rRNA; depletion leads to inhibited pre-rRNA processing and reduced polysome levels; localizes primarily to the nucleolus
158,YER145C,3104.345376,-1.566508523,0.159382629,-9.830460899,8.32E-23,7.47E-22,S000000947,FTR1,1215,Verified,chrV,460526,461740,-1,High affinity iron permease; involved in the transport of iron across the plasma membrane; forms complex with Fet3p; expression is regulated by iron; protein abundance increases in response to DNA replication stress
159,YER156C,521.4995986,-1.318005336,0.148864204,-8.850128369,8.74E-19,6.42E-18,S000000958,YER156C,1017,Uncharacterized,chrV,483325,484341,-1,"Putative protein of unknown function; interacts with Hsp82p and copurifies with Ipl1p; expression is copper responsive and downregulated in strains deleted for MAC1, a copper-responsive transcription factor; similarity to mammalian MYG1"
160,YFL002C,407.0595355,-1.027403788,0.112579836,-9.124556156,7.20E-20,5.55E-19,S000001894,SPB4,1821,Verified,chrVI,145114,146934,-1,Putative ATP-dependent RNA helicase; nucleolar protein required for synthesis of 60S ribosomal subunits at a late step in the pathway; sediments with 66S pre-ribosomes in sucrose gradients
161,YFL008W,380.4781889,-1.106729496,0.126751233,-8.729700187,2.55E-18,1.82E-17,S000001886,SMC1,3678,Verified,chrVI,119429,123106,1,"Subunit of the multiprotein cohesin complex; essential protein involved in chromosome segregation and in double-strand DNA break repair; SMC chromosomal ATPase family member, binds DNA with a preference for DNA with secondary structure"
162,YFL022C,2431.293706,-1.165029123,0.154775285,-7.526818841,5.20E-14,2.84E-13,S000001872,FRS2,1512,Verified,chrVI,93499,95010,-1,"Alpha subunit of cytoplasmic phenylalanyl-tRNA synthetase; forms a tetramer with Frs1p to form active enzyme; evolutionarily distant from mitochondrial phenylalanyl-tRNA synthetase based on protein sequence, but substrate binding is similar"
163,YFL023W,254.0000899,-2.094849418,0.155729972,-13.41363915,5.03E-41,9.71E-40,S000001871,BUD27,2391,Verified,chrVI,90986,93376,1,"Unconventional prefoldin protein involved in translation initiation; required for correct assembly of RNAP I, II, and III in an Rpb5p-dependent manner; shuttles between nucleus and cytoplasm; mutants have inappropriate expression of nutrient sensitive genes due to translational derepression of Gcn4p transcription factor; diploid mutants show random budding; ortholog of human URI/RMP"
164,YFL045C,3784.681214,-1.629857952,0.158605745,-10.27598938,9.04E-25,8.80E-24,S000001849,SEC53,765,Verified,chrVI,43628,44392,-1,Phosphomannomutase; involved in synthesis of GDP-mannose and dolichol-phosphate-mannose; required for folding and glycosylation of secretory proteins in the ER lumen
165,YFR001W,159.5451238,-1.216704293,0.244511367,-4.978521218,6.41E-07,1.88E-06,S000001897,LOC1,615,Verified,chrVI,149110,149724,1,Nucleolar protein involved in the asymmetric localization of ASH1 mRNA; binds cooperatively with She2p to the E3 zip-code element in the 3’-UTR of the mRNA; constituent of 66S pre-ribosomal particles involved in pre-rRNA processing and nuclear export of the 60S subunit; may facilitate Rpl43p loading; required post-transcriptionally for efficient retrotransposition; absence results in decreased Ty1 Gag:GFP protein levels; relocalizes from nucleus to cytoplasm upon DNA replication stress
166,YFR032C,12.57792443,-1.286318474,0.381081834,-3.318953387,0.000903555,0.00181291,S000001928,RRT5,870,Uncharacterized,chrVI,222090,222959,-1,Putative protein of unknown function; non-essential gene identified in a screen for mutants with increased levels of rDNA transcription; expressed at high levels during sporulation
167,YGL016W,764.0528361,-1.168915355,0.100511683,-11.62816997,2.96E-31,3.93E-30,S000002984,KAP122,3246,Verified,chrVII,461666,464911,1,Karyopherin beta; responsible for import of the Toa1p-Toa2p complex into the nucleus; binds to nucleoporins Nup1p and Nup2p; may play a role in regulation of pleiotropic drug resistance
168,YGL029W,83.86354648,-1.76614319,0.281930421,-6.24499198,4.24E-10,1.69E-09,S000002997,CGR1,363,Verified,chrVII,440063,440425,1,Protein involved in nucleolar integrity and processing of pre-rRNA; has a role in processing rRNA for the 60S ribosome subunit; transcript is induced in response to cytotoxic stress but not genotoxic stress; relocalizes from nucleus to nucleolus upon DNA replication stress
169,YGL035C,478.6105912,-1.022850814,0.086735474,-11.79037791,4.38E-32,6.05E-31,S000003003,MIG1,1515,Verified,chrVII,431548,433062,-1,"Transcription factor involved in glucose repression; sequence specific DNA binding protein containing two Cys2His2 zinc finger motifs; regulated by the SNF1 kinase and the GLC7 phosphatase; regulates filamentous growth along with Mig2p in response to glucose depletion; activated in stochastic pulses of nuclear localization, shuttling between cytosol and nucleus depending on external glucose levels and its phosphorylation state"
170,YGL055W,3471.004123,-2.70608915,0.109383963,-24.73326121,4.69E-135,1.83E-132,S000003023,OLE1,1533,Verified,chrVII,398628,400160,1,Delta(9) fatty acid desaturase; required for monounsaturated fatty acid synthesis and for normal distribution of mitochondria
171,YGL078C,830.6569791,-2.266113784,0.130013951,-17.41849949,5.97E-68,2.52E-66,S000003046,DBP3,1572,Verified,chrVII,360288,361859,-1,"RNA-Dependent ATPase, member of DExD/H-box family; involved in cleavage of site A3 within the ITS1 spacer during rRNA processing; not essential for growth, but deletion causes severe slow-growth phenotype"
172,YGL097W,750.217955,-1.040465046,0.106570068,-9.762514031,1.63E-22,1.44E-21,S000003065,SRM1,1449,Verified,chrVII,321782,323230,1,"Nucleotide exchange factor for Gsp1p; localizes to the nucleus, required for nucleocytoplasmic trafficking of macromolecules; suppressor of the pheromone response pathway; potentially phosphorylated by Cdc28p; human homolog of the RAN GEF, RCC1, can complement a temperature sensitive point mutant"
173,YGL099W,547.5705121,-1.733103993,0.09794606,-17.68235027,5.74E-70,2.66E-68,S000003067,LSG1,1923,Verified,chrVII,314631,316553,1,Putative GTPase involved in 60S ribosomal subunit biogenesis; required for the release of Nmd3p from 60S subunits in the cytoplasm
174,YGL111W,444.0609706,-1.332437581,0.106277667,-12.53229554,4.97E-36,7.91E-35,S000003079,NSA1,1392,Verified,chrVII,299978,301369,1,Constituent of 66S pre-ribosomal particles; involved in 60S ribosomal subunit biogenesis
175,YGL120C,1185.410503,-2.369261229,0.126607493,-18.70465058,4.54E-78,2.53E-76,S000003088,PRP43,2304,Verified,chrVII,281634,283937,-1,"RNA helicase in the DEAH-box family; functions in both RNA polymerase I and polymerase II transcript metabolism; catalyzes removal of U2, U5, and U6 snRNPs from the postsplicing lariat-intron ribonucleoprotein complex; required for efficient biogenesis of both small- and large-subunit rRNAs; acts with Sqs1p to promote 20S to 18S rRNA processing catalyzed by endonuclease Nob1p"
176,YGL123W,18380.94481,-1.000985684,0.149268476,-6.705728905,2.00E-11,9.01E-11,S000003091,RPS2,765,Verified,chrVII,277617,278381,1,Protein component of the small (40S) subunit; essential for control of translational accuracy; phosphorylation by C-terminal domain kinase I (CTDK-I) enhances translational accuracy; methylated on one or more arginine residues by Hmt1p; homologous to mammalian ribosomal protein S2 and bacterial S5
177,YGL147C,4637.05113,-1.117660477,0.147067449,-7.598942636,2.99E-14,1.66E-13,S000003115,RPL9A,576,Verified,chrVII,227754,228329,-1,"Ribosomal 60S subunit protein L9A; homologous to mammalian ribosomal protein L9 and bacterial L6; RPL9A has a paralog, RPL9B, that arose from a single-locus duplication"
178,YGL169W,364.1764853,-1.370115998,0.099359216,-13.78072338,3.33E-43,6.98E-42,S000003137,SUA5,1281,Verified,chrVII,186059,187339,1,Protein involved in threonylcarbamoyl adenosine biosynthesis; Sua5p and Qri7p are necessary and sufficient for RNA t6A modification in vitro; null mutant lacks N6-threonylcarbamoyl adenosine (t6A) modification in the anticodon loop of ANN-decoding tRNA; member of conserved YrdC/Sua5 family; binds single-stranded telomeric DNA and null mutant has abnormal telomere length
179,YGL171W,281.5801764,-2.770269139,0.138145481,-19.91364548,3.10E-88,2.48E-86,S000003139,ROK1,1695,Verified,chrVII,182390,184084,1,"RNA-dependent ATPase; involved in pre-rRNA processing at sites A0, A1, and A2, and in control of cell cycle progression; contains two upstream open reading frames (uORFs) in 5' untranslated region which regulate translation"
180,YGL225W,2197.179334,-1.265648247,0.105845213,-11.95679595,5.98E-33,8.56E-32,S000003193,VRG4,1014,Verified,chrVII,76894,77907,1,"Golgi GDP-mannose transporter; regulates Golgi function and glycosylation in Golgi; VRG4 has a paralog, HVG1, that arose from the whole genome duplication"
181,YGL253W,11300.87435,-1.147788767,0.230602299,-4.976345153,6.48E-07,1.90E-06,S000003222,HXK2,1461,Verified,chrVII,23935,25395,1,"Hexokinase isoenzyme 2; phosphorylates glucose in cytosol; predominant hexokinase during growth on glucose; represses expression of HXK1, GLK1, induces expression of its own gene; antiapoptotic; phosphorylation/dephosphorylation at Ser14 by kinase Snf1p, phosphatase Glc7p-Reg1p regulates nucleocytoplasmic shuttling of Hxk2p; functions downstream of Sit4p in control of cell cycle, mitochondrial function, oxidative stress resistance, chronological lifespan; has paralog HXK1"
182,YGL255W,2433.02405,-1.696472804,0.275472084,-6.210425339,5.28E-10,2.09E-09,S000003224,ZRT1,1131,Verified,chrVII,20978,22108,1,High-affinity zinc transporter of the plasma membrane; responsible for the majority of zinc uptake; transcription is induced under low-zinc conditions by the Zap1p transcription factor
183,YGR014W,2789.228915,-1.385154179,0.095111686,-14.5630806,4.82E-48,1.15E-46,S000003246,MSB2,3921,Verified,chrVII,516943,520863,1,Mucin family member involved in various signaling pathways; functions as osmosensor in the Sho1p-mediated HOG pathway; functions in Cdc42p- and MAP kinase-dependent filamentous growth signaling pathway; processed into secreted and cell-associated forms by aspartyl protease Yps1p; potential Cdc28p substrate
184,YGR054W,1732.28553,-1.171462895,0.117472553,-9.971802644,2.03E-23,1.86E-22,S000003286,YGR054W,1929,Verified,chrVII,596693,598621,1,"Eukaryotic initiation factor eIF2A; associates specifically with both 40S subunits and 80 S ribosomes, and interacts genetically with both eIF5b and eIF4E; homologous to mammalian eIF2A"
185,YGR079W,402.1030792,-3.210075034,0.193158548,-16.54782959,1.66E-61,6.03E-60,S000003311,YGR079W,1113,Uncharacterized,chrVII,640720,641832,1,Putative protein of unknown function; YGR079W is not an essential gene
186,YGR083C,676.8840786,-1.13045277,0.118057527,-9.574128327,1.03E-21,8.66E-21,S000003315,GCD2,1956,Verified,chrVII,644860,646815,-1,Delta subunit of the translation initiation factor eIF2B; the guanine-nucleotide exchange factor for eIF2; activity subsequently regulated by phosphorylated eIF2; first identified as a negative regulator of GCN4 expression
187,YGR090W,1421.988271,-1.292979527,0.082516232,-15.6678407,2.51E-55,7.62E-54,S000003322,UTP22,3714,Verified,chrVII,662358,666071,1,Component of the small-subunit processome; required for nuclear export of tRNAs; may facilitate binding of Utp8p to aminoacylated tRNAs and their delivery to Los1p for export; conserved from yeast to mammals
188,YGR103W,1095.084626,-2.939134467,0.135888877,-21.60445573,1.63E-103,2.27E-101,S000003335,NOP7,1818,Verified,chrVII,695417,697234,1,Component of several different pre-ribosomal particles; forms a complex with Ytm1p and Erb1p that is required for maturation of the large ribosomal subunit; required for exit from G<sub>0</sub> and the initiation of cell proliferation
189,YGR109C,52.85309054,-1.432795404,0.178763116,-7.965306238,1.65E-15,1.00E-14,S000003341,CLB6,1143,Verified,chrVII,705359,706501,-1,"B-type cyclin involved in DNA replication during S phase; activates Cdc28p to promote initiation of DNA synthesis; functions in formation of mitotic spindles along with Clb3p and Clb4p; most abundant during late G1; CLB6 has a paralog, CLB5, that arose from the whole genome duplication"
190,YGR123C,566.8698853,-2.039218855,0.159542816,-12.7732333,2.31E-37,3.86E-36,S000003355,PPT1,1542,Verified,chrVII,736662,738203,-1,Protein serine/threonine phosphatase; regulates Hsp90 chaperone by affecting its ATPase and cochaperone binding activities; has similarity to human phosphatase PP5; present in both the nucleus and cytoplasm; expressed during logarithmic growth
191,YGR128C,610.8583741,-1.974025168,0.122951598,-16.04462489,6.23E-58,2.02E-56,S000003360,UTP8,2142,Verified,chrVII,747950,750091,-1,Nucleolar protein required for export of tRNAs from the nucleus; also copurifies with the small subunit (SSU) processome containing the U3 snoRNA that is involved in processing of pre-18S rRNA
192,YGR138C,834.5718554,-2.879223412,0.128263009,-22.33315602,1.76E-110,3.24E-108,S000003370,TPO2,1845,Verified,chrVII,763762,765606,-1,"Polyamine transporter of the major facilitator superfamily; member of the 12-spanner drug:H(+) antiporter DHA1 family; specific for spermine; localizes to the plasma membrane; transcription of TPO2 is regulated by Haa1p; TPO2 has a paralog, TPO3, that arose from the whole genome duplication"
193,YGR140W,217.022046,-1.443345372,0.109523837,-13.16004466,1.49E-39,2.76E-38,S000003372,CBF2,2871,Verified,chrVII,767429,770299,1,"Essential kinetochore protein; component of the CBF3 multisubunit complex that binds to the CDEIII region of the centromere; Cbf2p also binds to the CDEII region possibly forming a different multimeric complex, ubiquitinated in vivo; sumoylated in an Mms21p-dependent manner; relative distribution to the spindle pole body decreases upon DNA replication stress"
194,YGR145W,418.5155751,-3.380423797,0.150656815,-22.24064774,1.39E-109,2.41E-107,S000003377,ENP2,2124,Verified,chrVII,781767,783890,1,"Component of the SSU; required for pre-18S rRNA processing, biogenesis of the small ribosomal subunit; interacts with U3 snoRNA, Mpp10p and Bfr2p; contains WD repeats, and has homology to Spb1p"
195,YGR151C,23.34065571,-1.110946739,0.34287487,-3.223933266,0.001264429,0.002481233,S000003383,YGR151C,336,Dubious,chrVII,794655,794990,-1,"Dubious open reading frame; unlikely to encode a functional protein, based on available experimental and comparative sequence data; overlaps almost completely with the verified ORF RSR1/BUD1/YGR152C; relative distribution to the nucleus increases upon DNA replication stress"
196,YGR155W,4701.216035,-1.233769,0.132038861,-9.343670106,9.31E-21,7.46E-20,S000003387,CYS4,1524,Verified,chrVII,798543,800066,1,"Cystathionine beta-synthase; catalyzes synthesis of cystathionine from serine and homocysteine, the first committed step in cysteine biosynthesis; responsible for hydrogen sulfide generation; advances passage through START by promoting cell growth which requires catalytic activity, and reducing critical cell size independent of catalytic activity; mutations in human ortholog CBS cause homocystinuria; human CBS can complement yeast null mutant"
197,YGR157W,4476.962228,-1.110663211,0.148181766,-7.495801839,6.59E-14,3.58E-13,S000003389,CHO2,2610,Verified,chrVII,802440,805049,1,Phosphatidylethanolamine methyltransferase (PEMT); catalyzes the first step in the conversion of phosphatidylethanolamine to phosphatidylcholine during the methylation pathway of phosphatidylcholine biosynthesis
198,YGR159C,2149.683281,-3.671223966,0.193129766,-18.99819478,1.77E-80,1.13E-78,S000003391,NSR1,1245,Verified,chrVII,806412,807656,-1,Nucleolar protein that binds nuclear localization sequences; required for pre-rRNA processing and ribosome biogenesis; binds to single stranded telomeric DNA and mRNA; methylated by Hmt1p; interaction with Top1p and nucleolar localization are negatively regulated by polyphosphorylation
199,YGR160W,259.7261753,-3.891245635,0.182791632,-20.77401084,7.44E-96,7.75E-94,S000003392,YGR160W,612,Dubious,chrVII,807073,807684,1,"Dubious open reading frame; unlikely to encode a functional protein, based on available experimental and comparative sequence data"
200,YGR162W,2308.755078,-1.877587687,0.122528681,-15.32228379,5.43E-53,1.50E-51,S000003394,TIF4631,2859,Verified,chrVII,824059,826917,1,"Translation initiation factor eIF4G; subunit of the mRNA cap-binding protein complex (eIF4F) that also contains eIF4E (Cdc33p); interacts with Pab1p and with eIF4A (Tif1p); also has a role in biogenesis of the large ribosomal subunit; TIF4631 has a paralog, TIF4632, that arose from the whole genome duplication"
201,YGR173W,337.0937336,-1.485986769,0.115218413,-12.88734635,5.30E-38,9.06E-37,S000003405,RBG2,1107,Verified,chrVII,843854,844960,1,Protein with a role in translation; forms a complex with Gir2p; has similarity to mammalian developmentally regulated GTP-binding protein
202,YGR177C,217.968398,-1.082857438,0.122019261,-8.868964718,7.38E-19,5.44E-18,S000003409,ATF2,1608,Verified,chrVII,848829,850436,-1,"Alcohol acetyltransferase; may play a role in steroid detoxification; forms volatile esters during fermentation, which is important for brewing and winemaking"
203,YGR187C,421.102329,-1.143956667,0.10501099,-10.89119101,1.27E-27,1.46E-26,S000003419,HGH1,1185,Verified,chrVII,870232,871416,-1,Nonessential protein of unknown function; predicted to be involved in ribosome biogenesis; green fluorescent protein (GFP)-fusion protein localizes to the cytoplasm; similar to mammalian BRP16 (Brain protein 16); relative distribution to the nucleus increases upon DNA replication stress
204,YGR200C,919.6982229,-1.595290631,0.074171093,-21.50160902,1.50E-102,2.00E-100,S000003432,ELP2,2367,Verified,chrVII,899904,902270,-1,Subunit of Elongator complex; binds to microtubules via conserved alkaline residues; has two seven-bladed WD40 &#946; propellers; Elongator complex is required for modification of wobble nucleosides in tRNA; target of Kluyveromyces lactis zymocin
205,YGR211W,816.6890872,-2.089088831,0.154233921,-13.53868418,9.24E-42,1.83E-40,S000003443,ZPR1,1461,Verified,chrVII,915241,916701,1,"Essential protein with two zinc fingers; present in nucleus of growing cells, relocates to cytoplasm in starved cells via a process mediated by Cpr1p; binds translation elongation factor eEF-1 (Tef1p); relative distribution to nucleus increases upon DNA replication stress; human ZPR1 gene can complement yeast by allowing growth during down-regulation of yeast zpr1"
206,YGR228W,31.07799028,-1.033915217,0.292806485,-3.514196625,0.000441086,0.000927441,S000003460,YGR228W,345,Dubious,chrVII,949365,949709,1,"Dubious open reading frame; unlikely to encode a functional protein, based on available experimental and comparative sequence data; partially overlaps the verified ORF SMI1/YGR229C"
207,YGR229C,801.021219,-1.265456548,0.123341983,-10.25831927,1.09E-24,1.05E-23,S000003461,SMI1,1518,Verified,chrVII,949382,950899,-1,Protein involved in the regulation of cell wall synthesis; proposed to be involved in coordinating cell cycle progression with cell wall integrity
208,YGR233C,958.2399073,-1.139520706,0.109158832,-10.43750352,1.67E-25,1.70E-24,S000003465,PHO81,3537,Verified,chrVII,954674,958210,-1,Cyclin-dependent kinase (CDK) inhibitor; regulates Pho80p-Pho85p and Pcl7p-Pho85p cyclin-CDK complexes in response to phosphate levels; inhibitory activity for Pho80p-Pho85p requires myo-D-inositol heptakisphosphate (IP7) generated by Vip1p; relative distribution to the nucleus increases upon DNA replication stress
209,YGR234W,2330.201185,-2.666792246,0.238366479,-11.17483143,5.42E-29,6.56E-28,S000003466,YHB1,1200,Verified,chrVII,959904,961103,1,"Nitric oxide oxidoreductase; flavohemoglobin that plays role in oxidative and nitrosative stress responses; protects against nitration of cellular targets and against cell growth inhibition under aerobic or anaerobic conditions; yeast flavohemoglobin Yhb1p and human homolog neuroglobin NGB protect cells against alpha-synuclein cytotoxicity and aggregate formation; protein increases in abundance, relocalizes from nucleus to cytoplasmic foci upon DNA replication stress"
210,YGR245C,673.0512245,-3.419271334,0.145431404,-23.41864354,2.76E-121,6.16E-119,S000003477,SDA1,2304,Verified,chrVII,979765,982068,-1,Protein required for actin organization and passage through Start; highly conserved nuclear protein; required for actin cytoskeleton organization; plays a critical role in G1 events; binds Nap1p; involved in 60S ribosome biogenesis
211,YGR271C-A,104.0078875,-1.624109419,0.236030134,-6.864896697,6.65E-12,3.11E-11,S000007608,EFG1,702,Verified,chrVII,1037800,1038501,-1,Essential protein required for maturation of 18S rRNA; null mutant is sensitive to hydroxyurea and is delayed in recovering from alpha-factor arrest; green fluorescent protein (GFP)-fusion protein localizes to the nucleolus
212,YGR280C,260.6421374,-1.196620715,0.202967252,-5.895450164,3.74E-09,1.36E-08,S000003512,PXR1,816,Verified,chrVII,1050910,1051725,-1,"Essential protein involved in rRNA and snoRNA maturation; competes with TLC1 RNA for binding to Est2p, suggesting a role in negative regulation of telomerase; human homolog inhibits telomerase; contains a G-patch RNA interacting domain"
213,YGR285C,3351.255494,-1.674736797,0.172340668,-9.71763967,2.54E-22,2.21E-21,S000003517,ZUO1,1302,Verified,chrVII,1061852,1063153,-1,Ribosome-associated chaperone; zuotin functions in ribosome biogenesis and as a chaperone for nascent polypeptide chains in partnership with Ssz1p and SSb1/2; contains a DnaJ domain and functions as a J-protein partner for Ssb1p and Ssb2p; human gene DNAJC2 can partially complement yeast zuo1 null mutant
214,YGR286C,820.2957593,-1.087688962,0.18481759,-5.898226834,3.67E-09,1.34E-08,S000003518,BIO2,1128,Verified,chrVII,1063813,1064940,-1,"Biotin synthase; catalyzes the conversion of dethiobiotin to biotin, which is the last step of the biotin biosynthesis pathway; complements E. coli bioB mutant"
215,YHL011C,1305.378344,-1.489760603,0.097042236,-15.34975848,3.56E-53,1.01E-51,S000001003,PRS3,963,Verified,chrVIII,80654,81616,-1,"5-phospho-ribosyl-1(alpha)-pyrophosphate synthetase; synthesizes PRPP, which is required for nucleotide, histidine, and tryptophan biosynthesis; one of five related enzymes, which are active as heteromultimeric complexes"
216,YHL013C,116.9929379,-1.716732816,0.179760857,-9.513238394,1.85E-21,1.53E-20,S000001005,OTU2,924,Verified,chrVIII,77430,78353,-1,"Protein of unknown function; may interact with ribosomes, based on co-purification experiments; member of the ovarian tumor-like (OTU) superfamily of predicted cysteine proteases; shows cytoplasmic localization; protein abundance increases in response to DNA replication stress"
217,YHL026C,186.6753889,-1.677118061,0.143142673,-11.68802376,1.47E-31,1.99E-30,S000001018,YHL026C,948,Uncharacterized,chrVIII,53219,54166,-1,"Putative protein of unknown function; transcriptionally regulated by Upc2p via an upstream sterol response element; SWAT-GFP fusion protein localizes to the cell periphery, while mCherry fusion localizes to both the cell periphery and vacuole; YHL026C is not an essential gene; in 2005 the start site was moved 141 nt upstream (see Locus History)"
218,YHL028W,336.4811029,-1.083542608,0.152610942,-7.095919464,1.28E-12,6.31E-12,S000001020,WSC4,1818,Verified,chrVIII,48763,50580,1,Endoplasmic reticulum (ER) membrane protein; involved in the translocation of soluble secretory proteins and insertion of membrane proteins into the ER membrane; may also have a role in the stress response but has only partial functional overlap with WSC1-3
219,YHL039W,496.8251667,-1.540660015,0.093427119,-16.4811553,5.01E-61,1.81E-59,S000001031,EFM1,1758,Verified,chrVIII,21783,23540,1,Lysine methyltransferase; involved in the monomethylation of eEF1A (Tef1p/Tef2p); SET-domain family member; predicted involvement in ribosome biogenesis; green fluorescent protein (GFP)-fusion protein localizes to the cytoplasm
220,YHR040W,131.1213008,-1.430610462,0.158784319,-8.990564336,2.46E-19,1.85E-18,S000001082,BCD1,1101,Verified,chrVIII,187924,189024,1,Essential protein required for the accumulation of box C/D snoRNA
221,YHR049C-A,28.35176483,-1.022623297,0.276668669,-3.674478815,0.000238335,0.000521005,S000003532,YHR049C-A,297,Dubious,chrVIII,207234,207530,-1,"Dubious open reading frame; unlikely to encode a functional protein, based on available experimental and comparative sequence data"
222,YHR049W,538.0218041,-1.193428819,0.070548014,-16.91008151,3.79E-64,1.46E-62,S000001091,FSH1,732,Verified,chrVIII,206462,207193,1,Putative serine hydrolase; localizes to both the nucleus and cytoplasm; sequence is similar to S. cerevisiae Fsh2p and Fsh3p and the human candidate tumor suppressor OVCA2
223,YHR052W,442.4224117,-2.278725722,0.149506245,-15.22004727,2.60E-52,7.02E-51,S000001094,CIC1,1131,Verified,chrVIII,210848,211978,1,Essential protein that interacts with proteasome components; has a potential role in proteasome substrate specificity; also copurifies with 66S pre-ribosomal particles
224,YHR062C,184.7352346,-1.227459515,0.116329491,-10.53923062,5.70E-26,5.99E-25,S000001104,RPP1,882,Verified,chrVIII,222877,223758,-1,"Subunit of both RNase MRP and nuclear RNase P; RNase MRP cleaves pre-rRNA, while nuclear RNase P cleaves tRNA precursors to generate mature 5' ends and facilitates turnover of nuclear RNAs; relocalizes to the cytosol in response to hypoxia"
225,YHR063W-A,300.8056402,-1.255647728,0.167000445,-7.516147515,5.64E-14,3.07E-13,S000028778,YHR063W-A,336,Dubious,chrVIII,225442,225777,1,"Dubious open reading frame; unlikely to encode a functional protein, based on available experimental and comparative sequence data; almost completely overlaps ORF SSZ1/YHR064C"
226,YHR064C,4863.7344,-1.171907879,0.142309744,-8.235023185,1.80E-16,1.15E-15,S000001106,SSZ1,1617,Verified,chrVIII,225525,227141,-1,Hsp70 protein that interacts with Zuo1p (a DnaJ homolog); interacts with Zuo1p to form a ribosome-associated complex that binds the ribosome via the Zuo1p subunit; also involved in pleiotropic drug resistance via sequential activation of PDR1 and PDR5; binds ATP
227,YHR065C,409.5420936,-1.423798493,0.119499769,-11.90930754,1.06E-32,1.50E-31,S000001107,RRP3,1506,Verified,chrVIII,227532,229037,-1,"Protein involved in rRNA processing; required for maturation of the 35S primary transcript of pre-rRNA and for cleavage leading to mature 18S rRNA; homologous to eIF-4a, which is a DEAD box RNA-dependent ATPase with helicase activity"
228,YHR066W,297.2886725,-3.063116776,0.185840652,-16.35791807,3.82E-60,1.35E-58,S000001108,SSF1,1362,Verified,chrVIII,229335,230696,1,"Constituent of 66S pre-ribosomal particles; required for ribosomal large subunit maturation; functionally redundant with Ssf2p; member of the Brix family; SSF1 has a paralog, SSF2, that arose from the whole genome duplication"
229,YHR070C-A,71.35753865,-1.377249186,0.19516393,-7.033509402,2.01E-12,9.76E-12,S000028780,YHR070C-A,411,Dubious,chrVIII,236102,236512,-1,"Dubious open reading frame; unlikely to encode a functional protein, based on available experimental and comparative sequence data; overlaps the verified gene TRM5/YHR070W"
230,YHR070W,366.942132,-1.240004866,0.094204036,-13.15653986,1.56E-39,2.87E-38,S000001112,TRM5,1500,Verified,chrVIII,234881,236380,1,"tRNA(m(1)G37)methyltransferase; methylates a tRNA base adjacent to the anticodon that has a role in prevention of frameshifting; localized to both cytoplasm and mitochondria, and modifies both cytoplasmic and mitochondrial tRNAs; mutations in human ortholog TRMT5 are associated with skeletal muscle respiratory chain deficiencies, and trm5 mutations analogous to disease mutations decrease respiration"
231,YHR085W,133.1741512,-1.789590911,0.159141508,-11.19987833,4.08E-29,4.98E-28,S000001127,IPI1,1005,Verified,chrVIII,276764,277768,1,Component of the Rix1 complex and possibly pre-replicative complexes; required for processing of ITS2 sequences from 35S pre-rRNA; component of the pre-60S ribosomal particle with the dynein-related AAA-type ATPase Mdn1p; required for pre-replicative complex (pre-RC) formation and maintenance during DNA replication licensing; relocalizes to the cytosol in response to hypoxia; essential gene
232,YHR088W,212.5762305,-2.131104884,0.16448561,-12.91134992,3.88E-38,6.67E-37,S000001130,RPF1,888,Verified,chrVIII,281495,282382,1,"Protein involved in assembly and export of the large ribosomal subunit; nucleolar protein; constituent of 66S pre-ribosomal particles; contains a sigma(70)-like motif, which is thought to bind RNA"
233,YHR089C,1056.99809,-1.695211592,0.1348201,-12.57118328,3.04E-36,4.85E-35,S000001131,GAR1,618,Verified,chrVIII,282681,283298,-1,Protein component of the H/ACA snoRNP pseudouridylase complex; involved in the modification and cleavage of the 18S pre-rRNA
234,YHR092C,1713.805935,-1.709359354,0.261817956,-6.542208088,6.06E-11,2.60E-10,S000001134,HXT4,1731,Verified,chrVIII,287081,288811,-1,"High-affinity glucose transporter; member of the major facilitator superfamily, expression is induced by low levels of glucose and repressed by high levels of glucose; HXT4 has a paralog, HXT7, that arose from the whole genome duplication"
235,YHR094C,1920.802303,-1.149996943,0.132005467,-8.711963921,2.99E-18,2.11E-17,S000001136,HXT1,1713,Verified,chrVIII,290913,292625,-1,"Low-affinity glucose transporter of the major facilitator superfamily; expression is induced by Hxk2p in the presence of glucose and repressed by Rgt1p when glucose is limiting; HXT1 has a paralog, HXT6, what arose from the whole genome duplication"
236,YHR127W,116.3352385,-1.005959183,0.17444118,-5.761480693,8.34E-09,2.95E-08,S000001169,YHR127W,732,Verified,chrVIII,360913,361644,1,Protein of unknown function; localizes to the nucleus; required for asymmetric localization of Kar9p during mitosis
237,YHR128W,1200.41271,-1.216160189,0.128610965,-9.455066134,3.23E-21,2.64E-20,S000001170,FUR1,651,Verified,chrVIII,362115,362765,1,Uracil phosphoribosyltransferase; synthesizes UMP from uracil; involved in the pyrimidine salvage pathway
238,YHR136C,218.0813515,-1.298528611,0.124512888,-10.41369786,2.15E-25,2.16E-24,S000001178,SPL2,447,Verified,chrVIII,374654,375100,-1,Protein with similarity to cyclin-dependent kinase inhibitors; downregulates low-affinity phosphate transport during phosphate limitation by targeting Pho87p to the vacuole; upstream region harbors putative hypoxia response element (HRE) cluster; overproduction suppresses a plc1 null mutation; promoter shows an increase in Snf2p occupancy after heat shock; GFP-fusion protein localizes to the cytoplasm
239,YHR146W,664.8674105,-1.104818358,0.171291713,-6.450611828,1.11E-10,4.68E-10,S000001189,CRP1,1398,Verified,chrVIII,390300,391697,1,"Protein that binds to cruciform DNA structures; CRP1 has a paralog, MDG1, that arose from the whole genome duplication"
240,YHR148W,142.0237939,-1.866705506,0.190715736,-9.754549404,1.76E-22,1.55E-21,S000001191,IMP3,552,Verified,chrVIII,393534,394085,1,"Component of the SSU processome; SSU processome is required for pre-18S rRNA processing, essential protein that interacts with Mpp10p and mediates interactions of Imp4p and Mpp10p with U3 snoRNA"
241,YHR149C,422.2591083,-1.595703582,0.098817685,-16.13498518,1.45E-58,4.92E-57,S000001192,SKG6,2205,Verified,chrVIII,394455,396659,-1,"Integral membrane protein; localizes primarily to growing sites such as the bud tip or the cell periphery; potential Cdc28p substrate; Skg6p interacts with Zds1p and Zds2p; SKG6 has a paralog, TOS2, that arose from the whole genome duplication"
242,YHR153C,25.98072205,-1.278021383,0.261047802,-4.845296382,1.26E-06,3.60E-06,S000001196,SPO16,597,Verified,chrVIII,402086,402682,-1,Meiosis-specific protein involved in synaptonemal complex assembly; implicated in regulation of crossover formation; required for sporulation
243,YHR154W,399.7928171,-1.549414444,0.119338245,-12.97505567,1.69E-38,2.94E-37,S000001197,RTT107,3213,Verified,chrVIII,402966,406178,1,Protein implicated in Mms22-dependent DNA repair during S phase; involved in recruiting the SMC5/6 complex to double-strand breaks; DNA damage induces phosphorylation by Mec1p at one or more SQ/TQ motifs; interacts with Mms22p and Slx4p; has four BRCT domains; has a role in regulation of Ty1 transposition; relative distribution to nuclear foci increases upon DNA replication stress
244,YHR169W,229.3884939,-2.319217971,0.122220694,-18.86994597,2.02E-79,1.22E-77,S000001212,DBP8,1296,Verified,chrVIII,442181,443476,1,"ATPase, putative RNA helicase of the DEAD-box family; component of 90S preribosome complex involved in production of 18S rRNA and assembly of 40S small ribosomal subunit; ATPase activity stimulated by association with Esf2p"
245,YHR170W,962.8959829,-2.334615962,0.115856839,-20.13772782,3.45E-90,2.99E-88,S000001213,NMD3,1557,Verified,chrVIII,443828,445384,1,Protein involved in nuclear export of the large ribosomal subunit; acts as a Crm1p-dependent adapter protein for export of nascent ribosomal subunits through the nuclear pore complex
246,YHR172W,170.9350747,-1.021525344,0.112757192,-9.052038438,1.40E-19,1.07E-18,S000001215,SPC97,2472,Verified,chrVIII,448335,450806,1,Component of the microtubule-nucleating Tub4p (gamma-tubulin) complex; interacts with Spc110p at the spindle pole body (SPB) inner plaque and with Spc72p at the SPB outer plaque
247,YHR196W,451.6518471,-1.963291662,0.128565671,-15.25510925,1.52E-52,4.16E-51,S000001239,UTP9,1728,Verified,chrVIII,491931,493658,1,Nucleolar protein; component of the small subunit (SSU) processome containing the U3 snoRNA that is involved in processing of pre-18S rRNA
248,YHR197W,468.3573402,-2.676933865,0.12260367,-21.76421849,5.07E-105,7.73E-103,S000001240,RIX1,2292,Verified,chrVIII,493896,496187,1,Component of the Rix1 complex and possibly pre-replicative complexes; required for processing of ITS2 sequences from 35S pre-rRNA; component of the pre-60S ribosomal particle with the dynein-related AAA-type ATPase Mdn1p; required for pre-replicative complex (pre-RC) formation and maintenance during DNA replication licensing; relocalizes to the cytosol in response to hypoxia; essential gene
249,YHR205W,1243.464027,-1.004143836,0.104804323,-9.580927202,9.62E-22,8.13E-21,S000001248,SCH9,2475,Verified,chrVIII,509363,511837,1,"AGC family protein kinase; functional ortholog of mammalian S6 kinase; phosphorylated by Tor1p and required for TORC1-mediated regulation of ribosome biogenesis, translation initiation, and entry into G0 phase; involved in transactivation of osmostress-responsive genes; regulates G1 progression, cAPK activity and nitrogen activation of the FGM pathway; integrates nutrient signals and stress signals from sphingolipids to regulate lifespan"
250,YHR215W,2238.147869,-2.217029391,0.189329436,-11.69754864,1.31E-31,1.78E-30,S000001258,PHO12,1404,Verified,chrVIII,552099,553502,1,"One of three repressible acid phosphatases; glycoprotein that is transported to the cell surface by the secretory pathway; pregulated by phosphate starvation; PHO12 has a paralog, PHO11, that arose from a segmental duplication"
251,YHR216W,885.0519901,-1.088646019,0.205727178,-5.295113611,1.19E-07,3.74E-07,S000001259,IMD2,1572,Verified,chrVIII,554396,555967,1,"Inosine monophosphate dehydrogenase; catalyzes the rate-limiting step in GTP biosynthesis, expression is induced by mycophenolic acid resulting in resistance to the drug, expression is repressed by nutrient limitation; IMD2 has a paralog, YAR073W/YAR075W, that arose from a segmental duplication"
252,YIL008W,151.3519234,-1.089368067,0.18246872,-5.966066038,2.43E-09,9.04E-09,S000001270,URM1,300,Verified,chrIX,342536,342835,1,Ubiquitin-like protein involved in thiolation of cytoplasmic tRNAs; receives sulfur from the E1-like enzyme Uba4p and transfers it to tRNA; also functions as a protein tag with roles in nutrient sensing and oxidative stress response
253,YIL009W,657.9968135,-1.046044804,0.09797413,-10.67482146,1.34E-26,1.46E-25,S000001271,FAA3,2085,Verified,chrIX,339344,341428,1,Long chain fatty acyl-CoA synthetase; activates imported fatty acids with a preference for C16:0-C18:0 chain lengths; green fluorescent protein (GFP)-fusion protein localizes to the cell periphery
254,YIL011W,155.0494216,-1.894233747,0.177255982,-10.65426926,1.67E-26,1.81E-25,S000001273,TIR3,810,Verified,chrIX,333727,334536,1,"Cell wall mannoprotein; member of Srp1p/Tip1p family of serine-alanine-rich proteins; expressed under anaerobic conditions and required for anaerobic growth; TIR3 has a paralog, TIR2, that arose from the whole genome duplication"
255,YIL019W,113.736469,-2.00748536,0.205819755,-9.699708538,3.02E-22,2.62E-21,S000001281,FAF1,1041,Verified,chrIX,315093,316133,1,Protein required for pre-rRNA processing; also required for 40S ribosomal subunit assembly
256,YIL064W,187.0464266,-1.602725337,0.122285431,-13.07632041,4.50E-39,8.10E-38,S000001326,EFM4,774,Verified,chrIX,241943,242716,1,Lysine methyltransferase; involved in the dimethylation of eEF1A (Tef1p/Tef2p) at lysine 316; sequence similarity to S-adenosylmethionine-dependent methyltransferases of the seven beta-strand family; role in vesicular transport
257,YIL091C,404.1753553,-2.303251183,0.13141832,-17.48874553,1.75E-68,7.47E-67,S000001353,UTP25,2166,Verified,chrIX,191030,193195,-1,Nucleolar protein; required for 35S pre-RNA processing and 40S ribosomal subunit biogenesis
258,YIL096C,114.5727972,-2.060288472,0.213134467,-9.606884896,7.48E-22,6.36E-21,S000001358,BMT5,1011,Verified,chrIX,182117,183127,-1,Methyltransferase required for m3U2634 methylation of the 25S rRNA; S-adenosylmethionine-dependent; associates with precursors of the 60S ribosomal subunit; predicted to be involved in ribosome biogenesis
259,YIL104C,144.9620768,-1.571725627,0.157335691,-9.965937424,2.15E-23,1.97E-22,S000001366,SHQ1,1524,Verified,chrIX,169982,171505,-1,Chaperone protein; required for the assembly of box H/ACA snoRNPs and thus for pre-rRNA processing; functions as an RNA mimic; forms a complex with Naf1p and interacts with H/ACA snoRNP components Nhp2p and Cbf5p; homology with known Hsp90p cochaperones; relocalizes to the cytosol in response to hypoxia
260,YIL121W,669.3248504,-1.22585299,0.126099995,-9.719524583,2.49E-22,2.17E-21,S000001383,QDR2,1629,Verified,chrIX,132244,133872,1,"Plasma membrane transporter of the major facilitator superfamily; member of the 12-spanner drug:H(+) antiporter DHA1 family; exports copper; has broad substrate specificity and can transport many mono- and divalent cations; transports a variety of drugs and is required for resistance to quinidine, barban, cisplatin, and bleomycin; contributes to potassium homeostasis; expression is regulated by copper"
261,YIL127C,136.6933673,-1.696362026,0.211241322,-8.012597666,1.12E-15,6.90E-15,S000001389,RRT14,621,Uncharacterized,chrIX,117024,117644,-1,Putative protein of unknown function; identified in a screen for mutants with decreased levels of rDNA transcription; green fluorescent protein (GFP)-fusion protein localizes to the nucleolus; predicted to be involved in ribosome biogenesis
262,YIL131C,258.8826963,-1.156311969,0.174291612,-6.63099301,3.33E-11,1.47E-10,S000001393,FKH1,1455,Verified,chrIX,100781,102235,-1,"Forkhead family transcription factor; rate-limiting replication origin activator; evolutionarily conserved lifespan regulator; binds multiple chromosomal elements with distinct specificities, cell cycle dynamics; regulates transcription elongation, chromatin silencing at mating loci, expression of G2/M phase genes; facilitates clustering, activation of early-firing replication origins; binds HML recombination enhancer, regulates donor preference during mating-type switching"
263,YIR012W,887.2966788,-1.294572001,0.089940392,-14.39155918,5.85E-47,1.35E-45,S000001451,SQT1,1296,Verified,chrIX,378486,379781,1,Specific chaperone for ribosomal protein Rpl10p; binds nascent Rpl10p during translation; contains multiple WD repeats; interacts with Qsr1p in a two-hybrid assay; protein abundance increases in response to DNA replication stress
264,YIR026C,331.217335,-1.122531994,0.090168796,-12.44314546,1.52E-35,2.36E-34,S000001465,YVH1,1095,Verified,chrIX,404873,405967,-1,"Dual specificity protein phosphatase; regulates growth, sporulation, and glycogen accumulation in a cAMP-dependent protein kinase cascade dependent manner; mutants are defective in 60S ribosome assembly; positively regulates pre-autophagosomal structure (PAS) formation upon nitrogen starvation or rapamycin treatment"
265,YJL010C,422.6893285,-1.735091013,0.107964306,-16.05673299,5.13E-58,1.67E-56,S000003547,NOP9,2001,Verified,chrX,417562,419562,-1,Essential subunit of U3-containing 90S preribosome; involved in production of 18S rRNA and assembly of small ribosomal subunit; also part of pre-40S ribosome and required for its export into cytoplasm; binds RNA and contains pumilio domain
266,YJL012C,3530.388879,-1.113091867,0.117056952,-9.508047548,1.94E-21,1.61E-20,S000003549,VTC4,2166,Verified,chrX,411234,413399,-1,Vacuolar membrane polyphosphate polymerase; subunit of the vacuolar transporter chaperone (VTC) complex involved in synthesis and transfer of polyP to the vacuole; regulates membrane trafficking; role in non-autophagic vacuolar fusion; protein abundance increases in response to DNA replication stress
267,YJL033W,516.3725538,-3.201848617,0.127189444,-25.03627531,2.46E-138,1.03E-135,S000003570,HCA4,2313,Verified,chrX,383837,386149,1,DEAD box RNA helicase; component of the SSU; interacts with Bfr2p and Enp2p; high-copy number suppression of a U14 snoRNA processing mutant suggests an involvement in 18S rRNA synthesis
268,YJL034W,6547.842852,-1.137655586,0.158410057,-7.181599987,6.89E-13,3.45E-12,S000003571,KAR2,2049,Verified,chrX,381327,383375,1,ATPase involved in protein import into the ER; also acts as a chaperone to mediate protein folding in the ER and may play a role in ER export of soluble proteins; regulates the unfolded protein response via interaction with Ire1p
269,YJL050W,891.3850298,-2.610024642,0.120487309,-21.63991461,7.56E-104,1.10E-101,S000003586,MTR4,3222,Verified,chrX,342522,345743,1,"ATP-dependent 3'-5' RNA helicase of the DExD/H family; involved in nuclear RNA processing and degradation both as a component of TRAMP complex and in TRAMP-independent processes; TRAMP unwinds RNA duplexes, with Mtr4p unwinding activity stimulated by Pap2p/Air2p but not dependent on ongoing polyadenylation; contains an arch domain, with two coiled-coil arms/stalks and a globular fist/KOW domain, which has RNA binding activity and is required for 5.8S rRNA processing"
270,YJL069C,466.2740831,-1.891528158,0.095869174,-19.70761745,1.85E-86,1.40E-84,S000003605,UTP18,1785,Verified,chrX,310922,312706,-1,Small-subunit processome protein involved in pre-18S rRNA maturation; part of a subunit of the 90S preribosomal particle capable of interacting directly with the 5' ETS of the 35S pre-rRNA; contains WD40 repeats
271,YJL074C,234.2302372,-2.007501516,0.147650327,-13.55973426,6.94E-42,1.39E-40,S000003610,SMC3,3693,Verified,chrX,299157,302849,-1,"Subunit of the multiprotein cohesin complex; required for sister chromatid cohesion in mitotic cells; also required, with Rec8p, for cohesion and recombination during meiosis; phylogenetically conserved SMC chromosomal ATPase family member"
272,YJL080C,4185.360173,-1.233828812,0.104404228,-11.81767759,3.16E-32,4.41E-31,S000003616,SCP160,3669,Verified,chrX,285558,289226,-1,"Essential RNA-binding G protein effector of mating response pathway; ligand-activated RNA-binding protein that delivers RNAs involved in polarization and perpetualizing mating signal to shmoo tip during pheromone signaling; Scp160p-mediated RNA trafficking essential for chemotropism and successful mating; mainly associated with nuclear envelope and ER, interacts in mRNA-dependent manner with translating ribosomes via multiple KH domains, similar to vertebrate vigilins"
273,YJL098W,438.0350275,-2.117259864,0.107094043,-19.73505562,1.08E-86,8.32E-85,S000003634,SAP185,3177,Verified,chrX,242082,245258,1,"Protein that forms a complex with the Sit4p protein phosphatase; required for Sit4p function; member of a family of similar proteins including Sap4p, Sap155p, and Sap190p; SAP185 has a paralog, SAP190, that arose from the whole genome duplication"
274,YJL109C,1810.968902,-2.109546188,0.112224142,-18.79405726,8.45E-79,4.94E-77,S000003645,UTP10,5310,Verified,chrX,212000,217309,-1,Nucleolar protein; component of the small subunit (SSU) processome containing the U3 snoRNA that is involved in processing of pre-18S rRNA; mutant has increased aneuploidy tolerance
275,YJL115W,209.0009879,-1.49782082,0.182100883,-8.21799451,2.07E-16,1.32E-15,S000003651,ASF1,840,Verified,chrX,196287,197126,1,"Nucleosome assembly factor; involved in chromatin assembly, disassembly; required for recovery after DSB repair; role in H3K56 acetylation required for expression homeostasis, buffering mRNA synthesis rate against gene dosage changes in S phase; anti-silencing protein, derepresses silent loci when overexpressed; role in regulating Ty1 transposition; relocalizes to cytosol under hypoxia; growth defect of asf1 null is functionally complemented by either human ASF1A or ASF1B"
276,YJL122W,246.7973438,-2.405313458,0.172720263,-13.87385442,9.12E-44,1.93E-42,S000003658,ALB1,528,Verified,chrX,189716,190243,1,Shuttling pre-60S factor; involved in the biogenesis of ribosomal large subunit; interacts directly with Arx1p; responsible for Tif6p recycling defects in absence of Rei1p
277,YJL125C,270.6940536,-1.552827646,0.132808614,-11.68021622,1.61E-31,2.17E-30,S000003661,GCD14,1152,Verified,chrX,185528,186679,-1,"Subunit of tRNA (1-methyladenosine) methyltransferase; required, along with Gcd10p, for the modification of the adenine at position 58 in tRNAs, especially tRNAi-Met; first identified as a negative regulator of GCN4 expression"
278,YJL130C,5237.352009,-2.197636899,0.168884152,-13.01246883,1.04E-38,1.84E-37,S000003666,URA2,6645,Verified,chrX,165723,172367,-1,Bifunctional carbamoylphosphate synthetase/aspartate transcarbamylase; catalyzes the first two enzymatic steps in the de novo biosynthesis of pyrimidines; both activities are subject to feedback inhibition by UTP
279,YJL138C,7352.391254,-1.167426859,0.128317052,-9.098064986,9.20E-20,7.04E-19,S000003674,TIF2,1188,Verified,chrX,153504,154691,-1,"Translation initiation factor eIF4A; DEA(D/H)-box RNA helicase that couples ATPase activity to RNA binding and unwinding; forms a dumbbell structure of two compact domains connected by a linker; interacts with eIF4G; protein abundance increases in response to DNA replication stress; TIF2 has a paralog, TIF1, that arose from the whole genome duplication"
280,YJL148W,315.8374158,-1.856439166,0.166496493,-11.13733599,8.26E-29,9.94E-28,S000003684,RPA34,702,Verified,chrX,140437,141138,1,RNA polymerase I subunit A34.5; essential for nucleolar assembly and for high polymerase loading rate; nucleolar localization depends on Rpa49p
281,YJL158C,6850.008702,-1.030257715,0.136600803,-7.542316128,4.62E-14,2.53E-13,S000003694,CIS3,684,Verified,chrX,122265,122948,-1,Mannose-containing glycoprotein constituent of the cell wall; member of the PIR (proteins with internal repeats) family
282,YJL190C,6246.710873,-1.145755963,0.134417647,-8.523493779,1.55E-17,1.05E-16,S000003726,RPS22A,393,Verified,chrX,74910,75302,-1,"Protein component of the small (40S) ribosomal subunit; homologous to mammalian ribosomal protein S15A and bacterial S8; RPS22A has a paralog, RPS22B, that arose from the whole genome duplication"
283,YJL208C,306.4762076,-1.362859514,0.100338081,-13.57120122,5.93E-42,1.19E-40,S000003744,NUC1,990,Verified,chrX,40194,41183,-1,"Major mitochondrial nuclease; has RNAse and DNA endo- and exonucleolytic activities; roles in mitochondrial recombination, apoptosis and maintenance of polyploidy; involved in fragmentation of genomic DNA during PND (programmed nuclear destruction); encodes ortholog of mammalian endoG"
284,YJL212C,801.023763,-2.072525126,0.147871413,-14.00799324,1.39E-44,3.01E-43,S000003748,OPT1,2400,Verified,chrX,33850,36249,-1,Proton-coupled oligopeptide transporter of the plasma membrane; also transports glutathione and phytochelatin; member of the OPT family
285,YJR002W,542.9758832,-1.752410937,0.090875156,-19.26847991,9.88E-83,6.57E-81,S000003762,MPP10,1782,Verified,chrX,438865,440646,1,"Component of the SSU processome and 90S preribosome; required for pre-18S rRNA processing, interacts with and controls the stability of Imp3p and Imp4p, essential for viability; similar to human Mpp10p"
286,YJR007W,1538.990519,-1.136830492,0.107057818,-10.61817449,2.45E-26,2.63E-25,S000003767,SUI2,915,Verified,chrX,451020,451934,1,Alpha subunit of the translation initiation factor eIF2; eIF2 is involved in identification of the start codon; phosphorylation of Ser51 is required for regulation of translation by inhibiting the exchange of GDP for GTP; protein abundance increases in response to DNA replication stress
287,YJR030C,267.4417127,-1.045966714,0.096032214,-10.88631193,1.34E-27,1.54E-26,S000003791,RBH2,2238,Uncharacterized,chrX,483959,486196,-1,"Putative protein of unknown function; expression repressed in carbon limited vs carbon replete chemostat cultures; non-essential gene; contains a PH-like domain; RBH2 has a paralog, RBH1, that arose from the whole genome duplication"
288,YJR041C,675.4212601,-1.641721736,0.112470854,-14.59181821,3.17E-48,7.64E-47,S000003802,URB2,3525,Verified,chrX,510239,513763,-1,Protein required for normal metabolism of the rRNA primary transcript; nucleolar protein; proposed to be involved in ribosome biogenesis
289,YJR048W,216.1079731,-1.3166242,0.184488501,-7.129410464,1.01E-12,4.98E-12,S000003809,CYC1,330,Verified,chrX,526335,526664,1,"Cytochrome c, isoform 1; also known as iso-1-cytochrome c; electron carrier of mitochondrial intermembrane space that transfers electrons from ubiquinone-cytochrome c oxidoreductase to cytochrome c oxidase during cellular respiration; CYC1 has a paralog, CYC7, that arose from the whole genome duplication; human homolog CYC1 can complement yeast null mutant; mutations in human CYC1 cause insulin-responsive hyperglycemia"
290,YJR063W,341.1742917,-1.488059099,0.102844505,-14.45545003,2.32E-47,5.46E-46,S000003824,RPA12,378,Verified,chrX,555195,555572,1,"RNA polymerase I subunit A12.2; contains two zinc binding domains, and the N terminal domain is responsible for anchoring to the RNA pol I complex; physically interacts with transcriptional activator Msn4p, to regulate transcription of AYR1, a gene involved in lipid metabolism"
291,YJR070C,798.4022009,-2.448142232,0.14574496,-16.78386364,3.20E-63,1.21E-61,S000003831,LIA1,978,Verified,chrX,569621,570598,-1,Deoxyhypusine hydroxylase; HEAT-repeat containing metalloenzyme that catalyzes hypusine formation; binds to and is required for the modification of Hyp2p (eIF5A); complements S. pombe mmd1 mutants defective in mitochondrial positioning; protein abundance increases in response to DNA replication stress
292,YJR071W,124.7820265,-2.088002884,0.153255815,-13.53038704,1.03E-41,2.05E-40,S000003832,YJR071W,369,Dubious,chrX,570405,570773,1,"Dubious open reading frame; unlikely to encode a functional protein, based on available experimental and comparative sequence data"
293,YJR072C,393.3137561,-1.356083446,0.117449767,-11.54092785,8.20E-31,1.07E-29,S000003833,NPA3,1158,Verified,chrX,570967,572124,-1,Member of the conserved GPN-loop GTPase family; has a role in transport of RNA polymerase II to the nucleus; exhibits GTP-dependent binding to PolII; has ATPase activity; involved in sister chromatid cohesion; phosphorylated by the Pcl1p-Pho85p kinase complex; human homolog XAB1 interacts with human RNA polymerase II; protein abundance increases in response to DNA replication stress
294,YJR077C,2237.202833,-1.16511735,0.144689011,-8.053488058,8.05E-16,4.97E-15,S000003838,MIR1,936,Verified,chrX,577255,578190,-1,Mitochondrial phosphate carrier; imports inorganic phosphate into mitochondria; functionally redundant with Pic2p but more abundant than Pic2p under normal conditions; phosphorylated
295,YJR097W,78.95977145,-1.730795676,0.199695079,-8.601454767,7.87E-18,5.40E-17,S000003858,JJJ3,519,Verified,chrX,612413,612931,1,Protein of unknown function; contains a CSL Zn finger and a DnaJ-domain; involved in diphthamide biosynthesis; ortholog human Dph4
296,YKL001C,224.3677509,-1.108301433,0.18251372,-6.069497835,1.28E-09,4.94E-09,S000001484,MET14,609,Verified,chrXI,438777,439385,-1,Adenylylsulfate kinase; required for sulfate assimilation and involved in methionine metabolism; human homolog PAPSS2 complements yeast null mutant
297,YKL004W,1245.902041,-1.29050994,0.109654136,-11.76787437,5.71E-32,7.85E-31,S000001487,AUR1,1206,Verified,chrXI,435580,436785,1,Phosphatidylinositol:ceramide phosphoinositol transferase; required for sphingolipid synthesis; can mutate to confer aureobasidin A resistance; also known as IPC synthase
298,YKL009W,548.3674193,-1.980966989,0.149139847,-13.27321186,3.31E-40,6.23E-39,S000001492,MRT4,711,Verified,chrXI,426242,426952,1,Protein involved in mRNA turnover and ribosome assembly; required at post-transcriptional step for efficient retrotransposition; localizes to the nucleolus
299,YKL014C,1088.629931,-1.475353005,0.086099283,-17.13272292,8.46E-66,3.43E-64,S000001497,URB1,5295,Verified,chrXI,411619,416913,-1,Protein required for the normal accumulation of 25S and 5.8S rRNAs; nucleolar protein; associated with the 27SA2 pre-ribosomal particle; proposed to be involved in the biogenesis of the 60S ribosomal subunit
300,YKL021C,366.8044791,-1.234460779,0.096357327,-12.80516006,1.53E-37,2.58E-36,S000001504,MAK11,1407,Verified,chrXI,397344,398750,-1,Protein involved in an early step of 60S ribosomal subunit biogenesis; essential for cell growth and replication of killer M1 dsRNA virus; contains four beta-transducin repeats
301,YKL054C,1597.553013,-1.096735233,0.204434503,-5.365339262,8.08E-08,2.58E-07,S000001537,DEF1,2217,Verified,chrXI,336537,338753,-1,"RNAPII degradation factor; forms a complex with Rad26p in chromatin, enables ubiquitination and proteolysis of RNAPII present in an elongation complex; mutant is deficient in Zip1p loading onto chromosomes during meiosis"
302,YKL068W-A,262.5265337,-1.113378676,0.169458815,-6.567232476,5.13E-11,2.22E-10,S000028524,YKL068W-A,237,Uncharacterized,chrXI,309206,309442,1,Putative protein of unknown function; identified by homology to <i>Ashbya gossypii</i>
303,YKL078W,187.2857082,-3.902968385,0.179445306,-20.82601568,2.52E-96,2.71E-94,S000001561,DHR2,2208,Verified,chrXI,288845,291052,1,Predominantly nucleolar DEAH-box ATP-dependent RNA helicase; required for 18S rRNA synthesis
304,YKL082C,334.3407828,-1.52272651,0.233823773,-6.515515444,7.24E-11,3.09E-10,S000001565,RRP14,1305,Verified,chrXI,281025,282329,-1,"Essential protein, constituent of 66S pre-ribosomal particles; interacts with proteins involved in ribosomal biogenesis and cell polarity; member of the SURF-6 family"
305,YKL096W,958.5325334,-3.578134845,0.182328407,-19.56671003,2.97E-85,2.14E-83,S000001579,CWP1,720,Verified,chrXI,261132,261851,1,"Cell wall mannoprotein that localizes to birth scars of daughter cells; linked to a beta-1,3- and beta-1,6-glucan heteropolymer through a phosphodiester bond; required for propionic acid resistance"
306,YKL096W-A,19092.27329,-1.165658355,0.099052886,-11.7681484,5.70E-32,7.84E-31,S000001956,CWP2,279,Verified,chrXI,259253,259531,1,Covalently linked cell wall mannoprotein; major constituent of the cell wall; plays a role in stabilizing the cell wall; involved in low pH resistance; precursor is GPI-anchored
307,YKL099C,144.8087519,-2.110196915,0.200852682,-10.45641697,1.37E-25,1.40E-24,S000001582,UTP11,753,Verified,chrXI,255720,256472,-1,Subunit of U3-containing Small Subunit (SSU) processome complex; involved in production of 18S rRNA and assembly of small ribosomal subunit
308,YKL101W,1065.226771,-1.073439196,0.086377406,-12.4262869,1.88E-35,2.89E-34,S000001584,HSL1,4557,Verified,chrXI,248920,253476,1,"Nim1p-related protein kinase; septin-binding kinase that localizes to the bud neck septin ring and regulates the morphogenesis checkpoint; phosphorylates Hsl7p and cooperates with Elm1p to recruit Hsl7p to the mother-bud neck, as a prerequisite for the subsequent recruitment, phosphorylation, and degradation of Swe1p; autophosphorylation enhances interactions with Hsl7p"
309,YKL109W,498.0251885,-1.123692046,0.159040001,-7.065082873,1.61E-12,7.83E-12,S000001592,HAP4,1665,Verified,chrXI,232227,233891,1,"Transcription factor; subunit of the heme-activated, glucose-repressed Hap2p/3p/4p/5p CCAAT-binding complex, a transcriptional activator and global regulator of respiratory gene expression; provides the principal activation function of the complex; involved in diauxic shift"
310,YKL113C,245.4164678,-1.148446696,0.128220631,-8.951490643,3.51E-19,2.63E-18,S000001596,RAD27,1149,Verified,chrXI,224727,225875,-1,"5' to 3' exonuclease, 5' flap endonuclease; required for Okazaki fragment processing and maturation, for long-patch base-excision repair and large loop repair (LLR), ribonucleotide excision repair; member of the S. pombe RAD2/FEN1 family; relocalizes to the cytosol in response to hypoxia"
311,YKL125W,334.0807943,-1.229418208,0.106778688,-11.50860835,1.19E-30,1.55E-29,S000001608,RRN3,1884,Verified,chrXI,208247,210130,1,Protein required for transcription of rDNA by RNA polymerase I; transcription factor independent of DNA template; involved in recruitment of RNA polymerase I to rDNA; structure reveals unique HEAT repeat fold and a surface serine patch; phosphorylation of serine patch impairs cell growth and reduces RNA polymerase I binding in vitro and RNA polymerase I recruitment to the rDNA gene in vivo
312,YKL143W,260.1789538,-2.968993728,0.183516379,-16.03661014,7.09E-58,2.26E-56,S000001626,LTV1,1392,Verified,chrXI,176781,178172,1,"Subunit of the EGO/GSE complex; the vacuolar/endosomal membrane associated EGO/GSE complex regulates exit from rapamycin-induced growth arrest, stimulating microautophagy and sorting of Gap1p from the endosome to the plasma membrane; required for ribosomal small subunit export from nucleus; required for growth at low temperature"
313,YKL165C,1025.967592,-1.041168709,0.100382056,-10.37143838,3.34E-25,3.33E-24,S000001648,MCD4,2760,Verified,chrXI,137932,140691,-1,Protein involved in GPI anchor synthesis; multimembrane-spanning protein that localizes to the endoplasmic reticulum; highly conserved among eukaryotes; GPI stands for glycosylphosphatidylinositol
314,YKL166C,197.6997561,-1.063686498,0.160960441,-6.60589446,3.95E-11,1.72E-10,S000001649,TPK3,1197,Verified,chrXI,134509,135705,-1,"cAMP-dependent protein kinase catalytic subunit; promotes vegetative growth in response to nutrients via the Ras-cAMP signaling pathway; partially redundant with Tpk1p and Tpk2p; localizes to P-bodies during stationary phase; TPK3 has a paralog, TPK1, that arose from the whole genome duplication"
315,YKL172W,485.6666345,-1.964041791,0.193979289,-10.12241418,4.39E-24,4.15E-23,S000001655,EBP2,1284,Verified,chrXI,125759,127042,1,"Required for 25S rRNA maturation and 60S ribosomal subunit assembly; localizes to the nucleolus and in foci along nuclear periphery; constituent of 66S pre-ribosomal particles; cooperates with Rrs1p and Mps3p to mediate telomere clustering by binding Sir4p, but is not involved in telomere tethering"
316,YKL181W,2036.319614,-1.013891066,0.074355027,-13.63534073,2.47E-42,4.96E-41,S000001664,PRS1,1284,Verified,chrXI,107316,108599,1,"5-phospho-ribosyl-1(alpha)-pyrophosphate synthetase; synthesizes PRPP, which is required for nucleotide, histidine, and tryptophan biosynthesis; plays a key role in cell wall integrity (CWI) pathway; one of five related enzymes, which are active as heteromultimeric complexes; missense mutations in human homolog PRPS1 are associated with neuropathic Arts syndrome and Charcot-Marie Tooth (CMTX5) disease"
317,YKL182W,11101.27728,-1.480750875,0.109716473,-13.49638009,1.64E-41,3.21E-40,S000001665,FAS1,6156,Verified,chrXI,100671,106826,1,"Beta subunit of fatty acid synthetase; complex catalyzes the synthesis of long-chain saturated fatty acids; contains acetyltransacylase, dehydratase, enoyl reductase, malonyl transacylase, and palmitoyl transacylase activities"
318,YKL191W,823.5216406,-1.460475442,0.104200074,-14.01323482,1.29E-44,2.81E-43,S000001674,DPH2,1605,Verified,chrXI,81035,82639,1,"Protein required for synthesis of diphthamide; required along with Dph1p, Kti11p, Jjj3p, and Dph5p; diphthamide is a modified histidine residue of translation elongation factor 2 (Eft1p or Eft2p); may act in a complex with Dph1p and Kti11p"
319,YKL216W,2017.83391,-2.746453643,0.141292292,-19.42697606,4.56E-84,3.21E-82,S000001699,URA1,945,Verified,chrXI,25215,26159,1,"Dihydroorotate dehydrogenase; catalyzes the fourth enzymatic step in the de novo biosynthesis of pyrimidines, converting dihydroorotic acid into orotic acid"
320,YKR012C,93.25394008,-1.033414206,0.17170701,-6.009530277,1.86E-09,7.01E-09,S000001720,YKR012C,378,Dubious,chrXI,463739,464116,-1,"Dubious open reading frame; unlikely to encode a functional protein, based on available experimental and comparative sequence data; partially overlaps the verified gene PRY2"
321,YKR013W,1396.223761,-1.155100439,0.114764957,-10.06436184,7.94E-24,7.41E-23,S000001721,PRY2,990,Verified,chrXI,463959,464948,1,"Sterol binding protein involved in the export of acetylated sterols; secreted glycoprotein and member of the CAP protein superfamily (cysteine-rich secretory proteins (CRISP), antigen 5, and pathogenesis related 1 proteins); sterol export function is redundant with that of PRY1; may be involved in detoxification of hydrophobic compounds; PRY2 has a paralog, PRY1, that arose from the whole genome duplication"
322,YKR024C,323.797432,-2.518960848,0.116659776,-21.48364587,2.21E-102,2.88E-100,S000001732,DBP7,2229,Verified,chrXI,485144,487372,-1,Putative ATP-dependent RNA helicase of the DEAD-box family; involved in ribosomal biogenesis; required at post-transcriptional step for efficient retrotransposition; essential for growth under anaerobic conditions
323,YKR025W,223.3318676,-1.387094524,0.142429544,-9.730159635,2.24E-22,1.96E-21,S000001733,RPC37,849,Verified,chrXI,487770,488618,1,RNA polymerase III subunit C37
324,YKR056W,459.5144335,-2.095268961,0.115385588,-18.13385175,1.72E-73,8.69E-72,S000001764,TRM2,1920,Verified,chrXI,549448,551367,1,tRNA methyltransferase; 5-methylates the uridine residue at position 54 of tRNAs and may also have a role in tRNA stabilization or maturation; endo-exonuclease with a role in DNA repair
325,YKR060W,142.9551592,-1.622228496,0.170311928,-9.500347919,2.09E-21,1.73E-20,S000001768,UTP30,825,Verified,chrXI,556518,557342,1,Putative subunit of U3-containing 90S preribosome complex; complex is involved in production of 18S rRNA and assembly of small ribosomal subunit
326,YKR075C,247.0843516,-2.148167326,0.176420421,-12.13439557,6.94E-34,1.03E-32,S000001783,YKR075C,924,Uncharacterized,chrXI,579827,580750,-1,"Protein of unknown function; similar to Reg1p; expression regulated by glucose and Rgt1p; GFP-fusion protein is induced in response to the DNA-damaging agent MMS; YKR075C has a paralog, YOR062C, that arose from the whole genome duplication"
327,YKR079C,365.1049278,-1.542108889,0.09557419,-16.12112161,1.81E-58,6.09E-57,S000001787,TRZ1,2517,Verified,chrXI,586789,589305,-1,tRNA 3'-end processing endonuclease tRNase Z; also localized to mitochondria and interacts genetically with Rex2 exonuclease; homolog of the human candidate prostate cancer susceptibility gene ELAC2
328,YKR081C,397.6485798,-2.319018631,0.150352248,-15.39511297,1.77E-53,5.11E-52,S000001789,RPF2,1035,Verified,chrXI,591506,592540,-1,Essential protein involved in rRNA maturation and ribosomal assembly; involved in the processing of pre-rRNA and the assembly of the 60S ribosomal subunit; interacts with ribosomal protein L11; localizes predominantly to the nucleolus; constituent of 66S pre-ribosomal particles
329,YKR092C,820.6347823,-2.452606542,0.143463974,-17.08134273,2.04E-65,8.19E-64,S000001800,SRP40,1221,Verified,chrXI,612665,613885,-1,Nucleolar serine-rich protein; role in preribosome assembly or transport; may function as a chaperone of small nucleolar ribonucleoprotein particles (snoRNPs); immunologically and structurally to rat Nopp140
330,YLL008W,653.9640847,-2.980057024,0.137533246,-21.60613713,1.57E-103,2.23E-101,S000003931,DRS1,2259,Verified,chrXII,131729,133987,1,Nucleolar DEAD-box protein required for ribosome assembly and function; including synthesis of 60S ribosomal subunits; constituent of 66S pre-ribosomal particles
331,YLL011W,344.9122916,-2.068453687,0.11438258,-18.04495623,8.64E-73,4.25E-71,S000003934,SOF1,1470,Verified,chrXII,127523,128992,1,Protein required for biogenesis of 40S (small) ribosomal subunit; has similarity to the beta subunit of trimeric G-proteins and the splicing factor Prp4p; essential gene
332,YLL012W,287.8363969,-1.836352569,0.140799959,-13.02265268,9.10E-39,1.62E-37,S000003935,YEH1,1722,Verified,chrXII,125534,127255,1,"Steryl ester hydrolase; one of three gene products (Yeh1p, Yeh2p, Tgl1p) responsible for steryl ester hydrolase activity and involved in sterol homeostasis; localized to lipid particle membranes; YEH1 has a paralog, YEH2, that arose from the whole genome duplication"
333,YLL024C,24372.67171,-1.920213729,0.295032085,-6.500609444,8.00E-11,3.40E-10,S000003947,SSA2,1920,Verified,chrXII,95566,97485,-1,"HSP70 family ATP-binding protein; involved in protein folding, vacuolar import of proteins; required for ubiquitin-dependent degradation of short-lived proteins; associated with chaperonin-containing T-complex; 98% identical to paralog Ssa1p with distinct functional specificity in propagation of yeast [URE3] prions and vacuolar-mediated degradation of gluconeogenesis enzymes; binds tRNA, has role in tRNA nuclear import during starvation"
334,YLL034C,465.070422,-2.34818738,0.10956673,-21.38489998,1.85E-101,2.36E-99,S000003957,RIX7,2514,Verified,chrXII,70633,73146,-1,"Putative ATPase of the AAA family; required for export of pre-ribosomal large subunits from the nucleus; distributed between the nucleolus, nucleoplasm, and nuclear periphery depending on growth conditions"
335,YLL045C,7609.847185,-1.0293631,0.114987801,-8.951728989,3.50E-19,2.62E-18,S000003968,RPL8B,771,Verified,chrXII,47859,48629,-1,"Ribosomal 60S subunit protein L8B; required for processing of 27SA3 pre-rRNA to 27SB pre-rRNA during assembly of large ribosomal subunit; depletion leads to a turnover of pre-rRNA; L8 binds to Domain I of 25S and 5.8 S rRNAs; mutation results in decreased amounts of free 60S subunits; homologous to mammalian ribosomal protein L7A, no bacterial homolog; RPL8B has a paralog, RPL8A, that arose from the whole genome duplication"
336,YLL061W,308.3723793,-2.448667864,0.166186297,-14.68946691,7.53E-49,1.85E-47,S000003984,MMP1,1752,Verified,chrXII,17956,19707,1,High-affinity S-methylmethionine permease; required for utilization of S-methylmethionine as a sulfur source; has similarity to S-adenosylmethionine permease Sam3p
337,YLL062C,87.4275106,-2.033440765,0.209977747,-9.602625543,7.79E-22,6.61E-21,S000003985,MHT1,975,Verified,chrXII,16639,17613,-1,S-methylmethionine-homocysteine methyltransferase; functions along with Sam4p in the conversion of S-adenosylmethionine (AdoMet) to methionine to control the methionine/AdoMet ratio
338,YLR002C,398.8282741,-1.899844042,0.121743293,-15.58733817,8.88E-55,2.66E-53,S000003992,NOC3,1992,Verified,chrXII,154343,156334,-1,"Subunit of a nuclear complex with Noc2p and pre-replicative complexes; the Noc2p-Noc3p complex binds to 66S ribosomal precursors to mediate their maturation and intranuclear transport; binds to chromatin at active replication origins, and is required for pre-RC formation and maintenance during DNA replication licensing"
339,YLR003C,195.9909575,-1.407699055,0.162275072,-8.665033495,4.51E-18,3.15E-17,S000003993,CMS1,876,Verified,chrXII,156855,157730,-1,Putative subunit of the 90S preribosome processome complex; overexpression rescues supressor mutant of mcm10; null mutant is viable; relocalizes from nucleus to cytoplasm upon DNA replication stress
340,YLR009W,425.729967,-1.788066552,0.148537977,-12.02933959,2.49E-33,3.62E-32,S000003999,RLP24,600,Verified,chrXII,166537,167136,1,"Essential protein required for ribosomal large subunit biogenesis; associated with pre-60S ribosomal subunits; stimulates the ATPase activity of Afg2p, which is required for release of Rlp24p from the pre-60S particle; has similarity to Rpl24Ap and Rpl24Bp"
341,YLR017W,618.3537327,-1.726122801,0.146213353,-11.80088309,3.86E-32,5.35E-31,S000004007,MEU1,1014,Verified,chrXII,177608,178621,1,Methylthioadenosine phosphorylase (MTAP); catalyzes the initial step in the methionine salvage pathway; affects polyamine biosynthesis through regulation of ornithine decarboxylase (Spe1p) activity; regulates ADH2 gene expression
342,YLR044C,73358.83376,-1.195786893,0.230735746,-5.180843433,2.21E-07,6.76E-07,S000004034,PDC1,1692,Verified,chrXII,232390,234081,-1,"Major of three pyruvate decarboxylase isozymes; key enzyme in alcoholic fermentation; decarboxylates pyruvate to acetaldehyde; involved in amino acid catabolism; subject to glucose-, ethanol-, and autoregulation; activated by phosphorylation in response to glucose levels; N-terminally propionylated in vivo"
343,YLR051C,156.0086728,-1.31939864,0.194495214,-6.780611569,1.20E-11,5.46E-11,S000004041,FCF2,654,Verified,chrXII,246324,246977,-1,Nucleolar protein involved in the early steps of 35S rRNA processing; interacts with Faf1p; member of a transcriptionally co-regulated set of genes called the RRB regulon; essential gene
344,YLR062C,605.3242573,-1.018499228,0.167391281,-6.082253891,1.19E-09,4.58E-09,S000004052,BUD28,378,Dubious,chrXII,263577,263954,-1,"Dubious open reading frame; unlikely to encode a functional protein, based on available experimental and comparative sequence data; not conserved in closely related Saccharomyces species; 98% of ORF overlaps the verified gene RPL22A; diploid mutant displays a weak budding pattern phenotype in a systematic assay"
345,YLR063W,180.1555313,-1.81268539,0.13585867,-13.29979537,2.32E-40,4.40E-39,S000004053,BMT6,1098,Verified,chrXII,264157,265254,1,Methyltransferase required for m3U2843 methylation of the 25S rRNA; S-adenosylmethionine-dependent; green fluorescent protein (GFP)-fusion protein localizes to the cytoplasm; YLR063W is not an essential gene
346,YLR068W,63.45740062,-1.257003735,0.280648163,-4.475214732,7.63E-06,1.98E-05,S000004058,FYV7,456,Verified,chrXII,271008,271463,1,Essential protein required for maturation of 18S rRNA; required for survival upon exposure to K1 killer toxin
347,YLR073C,270.2587738,-1.739614157,0.13173621,-13.18636567,1.05E-39,1.96E-38,S000004063,RFU1,603,Verified,chrXII,281019,281621,-1,Protein that inhibits Doa4p deubiquitinating activity; contributes to ubiquitin homeostasis by regulating the conversion of free ubiquitin chains to ubiquitin monomers by Doa4p; GFP-fusion protein localizes to endosomes
348,YLR074C,291.5072519,-1.965449193,0.148834469,-13.18015209,1.14E-39,2.12E-38,S000004064,BUD20,501,Verified,chrXII,281956,282456,-1,"C2H2-type zinc finger protein required for ribosome assembly; shuttling factor which associates with pre-60S particles in the nucleus, accompanying them to the cytoplasm; cytoplasmic dissociation of Bud20p requires Drg1p; N-terminus harbors a nuclear localization signal (NLS) and a nuclear export signal (NES); cytoplasmic Bud20p is reimported by Kap123-dependent pathway; involved in bud-site selection; diploid mutants display a random budding pattern; similar to human ZNF593"
349,YLR083C,2324.537049,-1.002949355,0.103105766,-9.727122284,2.31E-22,2.02E-21,S000004073,EMP70,2004,Verified,chrXII,294091,296094,-1,"Protein with a role in cellular adhesion and filamentous growth; also endosome-to-vacuole sorting; similar to Tmn3p; member of Transmembrane Nine family of proteins with 9 transmembrane segments; EMP70 has a paralog, TMN2, that arose from the whole genome duplication"
350,YLR103C,125.7043398,-1.327754373,0.149873049,-8.841499892,9.44E-19,6.92E-18,S000004093,CDC45,1953,Verified,chrXII,343989,345941,-1,"DNA replication initiation factor; recruited to MCM pre-RC complexes at replication origins; promotes release of MCM from Mcm10p, recruits elongation machinery; binds tightly to ssDNA, which disrupts interaction with the MCM helicase and stalls it during replication stress; mutants in human homolog may cause velocardiofacial and DiGeorge syndromes"
351,YLR106C,2108.953539,-2.082098186,0.107172174,-19.42482386,4.76E-84,3.31E-82,S000004096,REA1,14733,Verified,chrXII,349006,363738,-1,"Huge dynein-related AAA-type ATPase (midasin); forms extended pre-60S particle with the Rix1 complex; involved with interaction partners Rsa4p and Ytm1p, in the ATP-dependent remodeling of the pre-60S particle at successive maturation steps during ribosomal biogenesis; involved in the removal of biogenesis factors including GTPase Nog2p prior to nuclear export; contains a hexameric AAA-motor head domain and a long flexible tail with a MIDAS (metal ion-dependent adhesion site) domain"
352,YLR129W,782.8575754,-1.978627504,0.100468221,-19.6825633,3.04E-86,2.24E-84,S000004119,DIP2,2832,Verified,chrXII,399657,402488,1,"Nucleolar protein; specifically associated with the U3 snoRNA, part of the large ribonucleoprotein complex known as the small subunit (SSU) processome, required for 18S rRNA biogenesis, part of the active pre-rRNA processing complex"
353,YLR146C,237.1500985,-1.093558686,0.137898356,-7.926624904,2.25E-15,1.36E-14,S000004136,SPE4,903,Verified,chrXII,432823,433725,-1,Spermine synthase; required for the biosynthesis of spermine and also involved in biosynthesis of pantothenic acid
354,YLR154W-E,383.6564728,-1.464535983,0.303083757,-4.832102558,1.35E-06,3.82E-06,S000028676,YLR154W-E,204,Dubious,chrXII,455433,455636,1,"Dubious open reading frame; unlikely to encode a functional protein, based on available experimental and comparative sequence data; encoded within the 35S rRNA gene on the opposite strand"
355,YLR175W,2438.070317,-1.468414421,0.132366076,-11.09348135,1.35E-28,1.61E-27,S000004165,CBF5,1452,Verified,chrXII,506134,507585,1,"Pseudouridine synthase catalytic subunit of box H/ACA snoRNPs; acts on large and small rRNAs, on snRNA U2, and on some mRNAs; mutations in human ortholog dyskerin cause the disorder dyskeratosis congenita; small nucleolar ribonucleoprotein particles are also known as snoRNPs"
356,YLR179C,1597.572222,-1.062296037,0.11856127,-8.959645965,3.26E-19,2.44E-18,S000004169,YLR179C,606,Verified,chrXII,514108,514713,-1,Protein of unknown function with similarity to Tfs1p; transcription is activated by paralogous proteins Yrm1p and Yrr1p along with proteins involved in multidrug resistance; GFP-tagged protein localizes to the cytoplasm and nucleus
357,YLR180W,2818.395744,-3.816465862,0.384385878,-10.02583676,1.17E-23,1.08E-22,S000004170,SAM1,1149,Verified,chrXII,515262,516410,1,"S-adenosylmethionine synthetase; catalyzes transfer of the adenosyl group of ATP to the sulfur atom of methionine; SAM1 has a paralog, SAM2, that arose from the whole genome duplication"
358,YLR183C,217.6915384,-2.337509895,0.14781307,-15.74233666,7.75E-56,2.38E-54,S000004173,TOS4,1470,Verified,chrXII,520543,522012,-1,"Putative transcription factor, contains Forkhead Associated domain; binds chromatin; involved in expression homeostasis, buffering of mRNA synthesis rate against gene dosage changes during S phase; target of SBF transcription factor; expression is periodic and peaks in G1; involved in DNA replication checkpoint response; interacts with Rpd3 and Set3 histone deacetylase complexes; APCC(Cdh1) substrate; relative distribution to nucleus increases upon DNA replication stress"
359,YLR186W,492.8498229,-1.245814574,0.093414828,-13.33178096,1.51E-40,2.88E-39,S000004176,EMG1,759,Verified,chrXII,523632,524390,1,"Methyltransferase for rRNA; methylates pseudouridine 18S rRNA residue 1191; member of the SPOUT methyltransferase family; required for maturation of 18S rRNA and for 40S ribosomal subunit production independent of methyltransferase activity; forms homodimers; human ortholog is mutated in Bowen-Conradi syndrome, and equivalent yeast mutation affects Emg1p dimerization and localization but not methyltransferase activity; human EMG1 complements lethality of null and ts mutant"
360,YLR196W,788.551537,-2.322329584,0.126313361,-18.37076161,2.25E-75,1.19E-73,S000004186,PWP1,1731,Verified,chrXII,543968,545698,1,Protein with WD-40 repeats involved in rRNA processing; associates with trans-acting ribosome biogenesis factors; similar to beta-transducin superfamily
361,YLR197W,2165.628343,-2.009999384,0.174058352,-11.5469346,7.65E-31,1.00E-29,S000004187,NOP56,1515,Verified,chrXII,546097,547611,1,Essential evolutionarily-conserved nucleolar protein; component of the box C/D snoRNP complexes that direct 2'-O-methylation of pre-rRNA during its maturation; overexpression causes spindle orientation defects
362,YLR198C,139.7762905,-1.92802322,0.228932826,-8.396283293,4.61E-17,3.04E-16,S000004188,YLR198C,360,Dubious,chrXII,547286,547645,-1,"Dubious open reading frame; unlikely to encode a functional protein, based on available experimental and comparative sequence data; overlaps the verified gene SIK1/YLR197W"
363,YLR214W,1508.977776,-1.173007724,0.176794896,-6.633582646,3.28E-11,1.44E-10,S000004204,FRE1,2061,Verified,chrXII,568567,570627,1,Ferric reductase and cupric reductase; reduces siderophore-bound iron and oxidized copper prior to uptake by transporters; expression induced by low copper and iron levels
364,YLR221C,211.1197753,-1.266470182,0.167081086,-7.575889338,3.57E-14,1.97E-13,S000004211,RSA3,663,Verified,chrXII,578362,579024,-1,Protein with a likely role in ribosomal maturation; required for accumulation of wild-type levels of large (60S) ribosomal subunits; binds to the helicase Dbp6p in pre-60S ribosomal particles in the nucleolus
365,YLR222C,619.4120824,-2.172065121,0.103921617,-20.87685406,8.69E-97,9.71E-95,S000004212,UTP13,2454,Verified,chrXII,579318,581771,-1,Nucleolar protein; component of the small subunit (SSU) processome containing the U3 snoRNA that is involved in processing of pre-18S rRNA
366,YLR223C,722.1669655,-1.737457517,0.123666171,-14.04563155,8.19E-45,1.79E-43,S000004213,IFH1,3258,Verified,chrXII,582233,585490,-1,"Coactivator, regulates transcription of ribosomal protein (RP) genes; recruited to RP gene promoters during optimal growth conditions via Fhl1p; subunit of CURI, a complex that coordinates RP production and pre-rRNA processing; regulated by acetylation and phosphorylation at different growth states via TORC1 signaling; IFH1 has a paralog, CRF1, that arose from the whole genome duplication"
367,YLR249W,36163.40791,-2.024764819,0.179653378,-11.2711231,1.82E-29,2.25E-28,S000004239,YEF3,3135,Verified,chrXII,636780,639914,1,"Translation elongation factor 3; contains two ABC cassettes; binds and hydrolyzes ATP; YEF3 has a paralog, HEF3, that arose from the whole genome duplication"
368,YLR276C,516.2774771,-1.873567301,0.11643974,-16.0777736,3.65E-58,1.20E-56,S000004266,DBP9,1785,Verified,chrXII,695046,696830,-1,"DEAD-box protein required for 27S rRNA processing; exhibits DNA, RNA and DNA/RNA helicase activities; ATPase activity shows preference for DNA over RNA; DNA helicase activity abolished by mutation in RNA-binding domain"
369,YLR296W,1.512883859,-1.731393832,0.529372615,-3.251298985,0.00114879,0.002266404,S000004287,YLR296W,327,Uncharacterized,chrXII,722978,723304,1,Putative protein of unknown function; conserved across S. cerevisiae strains
370,YLR300W,6971.811934,-1.433310248,0.088697079,-16.15943362,9.75E-59,3.33E-57,S000004291,EXG1,1347,Verified,chrXII,728955,730301,1,"Major exo-1,3-beta-glucanase of the cell wall; involved in cell wall beta-glucan assembly; exists as three differentially glycosylated isoenzymes; EXG1 has a paralog, SPR1, that arose from the whole genome duplication"
371,YLR336C,374.9821453,-1.87929839,0.102768971,-18.25615501,1.85E-74,9.47E-73,S000004328,SGD1,2700,Verified,chrXII,799697,802396,-1,Essential nuclear protein; required for biogenesis of the small ribosomal subunit; has a possible role in the osmoregulatory glycerol response; putative homolog of human NOM1 which is implicated in acute myeloid leukemia
372,YLR342W,12655.23519,-1.112235375,0.089188538,-12.47058259,1.08E-35,1.70E-34,S000004334,FKS1,5631,Verified,chrXII,809997,815627,1,"Catalytic subunit of 1,3-beta-D-glucan synthase; functionally redundant with alternate catalytic subunit Gsc2p; binds to regulatory subunit Rho1p; involved in cell wall synthesis and maintenance; localizes to sites of cell wall remodeling; FKS1 has a paralog, GSC2, that arose from the whole genome duplication"
373,YLR342W-A,43.83940523,-1.131033141,0.236392183,-4.76405941,1.90E-06,5.29E-06,S000028571,YLR342W-A,174,Uncharacterized,chrXII,815810,815983,1,Putative protein of unknown function
374,YLR363W-A,105.9869478,-1.376516187,0.162562052,-8.442867289,3.10E-17,2.07E-16,S000007620,YLR363W-A,258,Verified,chrXII,853461,853718,1,Protein of unknown function; green fluorescent protein (GFP)-fusion protein localizes to the nucleus; relocalizes from nucleus to nucleolus upon DNA replication stress
375,YLR372W,2853.093843,-1.108244269,0.105364259,-10.51794242,7.14E-26,7.49E-25,S000004364,ELO3,1038,Verified,chrXII,867354,868391,1,Elongase; involved in fatty acid and sphingolipid biosynthesis; synthesizes very long chain 20-26-carbon fatty acids from C18-CoA primers; involved in regulation of sphingolipid biosynthesis; lethality of the elo2 elo3 double null mutation is functionally complemented by human ELOVL1 and weakly complemented by human ELOVL3 or ELOV7
376,YLR384C,1308.554445,-1.057141698,0.06580291,-16.06404822,4.56E-58,1.49E-56,S000004376,IKI3,4050,Verified,chrXII,888851,892900,-1,"Subunit of Elongator complex; Elongator is required for modification of wobble nucleosides in tRNA; maintains structural integrity of Elongator; homolog of human IKAP, mutations in which cause familial dysautonomia (FD)"
377,YLR397C,477.727628,-1.184746955,0.086424295,-13.70399231,9.61E-43,1.98E-41,S000004389,AFG2,2343,Verified,chrXII,912550,914892,-1,"ATPase of the CDC48/PAS1/SEC18 (AAA) family, forms a hexameric complex; is essential for pre-60S maturation and release of several preribosome maturation factors; releases Rlp24p from purified pre-60S particles in vitro; target of the ribosomal biosynthesis inhibitor diazaborine; may be involved in degradation of aberrant mRNAs"
378,YLR400W,23.99751386,-2.174323748,0.317861228,-6.541927902,6.07E-11,2.61E-10,S000004392,YLR400W,474,Dubious,chrXII,922063,922536,1,"Dubious open reading frame; unlikely to encode a functional protein, based on available experimental and comparative sequence data"
379,YLR401C,449.205904,-1.995853282,0.104905551,-18.99453361,1.89E-80,1.20E-78,S000004393,DUS3,2007,Verified,chrXII,922442,924448,-1,"Dihydrouridine synthase; member of a widespread family of conserved proteins including Smm1p, Dus1p, and Dus4p; contains a consensus oleate response element (ORE) in its promoter region; forms nuclear foci upon DNA replication stress"
380,YLR409C,884.9851512,-2.318076096,0.107697337,-21.50819945,1.30E-102,1.77E-100,S000004401,UTP21,2820,Verified,chrXII,934414,937233,-1,Subunit of U3-containing 90S preribosome and SSU processome complexes; involved in production of 18S rRNA and assembly of small ribosomal subunit; synthetic defect with STI1 Hsp90 cochaperone; human homolog linked to glaucoma; Small Subunit processome is also known as SSU processome
381,YLR413W,2228.706022,-3.167966378,0.254336326,-12.45776846,1.27E-35,1.98E-34,S000004405,INA1,2028,Verified,chrXII,951156,953183,1,"Protein of unknown function; not an essential gene; YLR413W has a paralog, FAT3, that arose from the whole genome duplication"
382,YLR419W,438.2045673,-1.130370236,0.096186326,-11.74877331,7.17E-32,9.78E-31,S000004411,YLR419W,4308,Uncharacterized,chrXII,958428,962735,1,"Putative helicase with limited sequence similarity to human Rb protein; the authentic, non-tagged protein is detected in highly purified mitochondria in high-throughput studies; YLR419W is not an essential gene"
383,YLR420W,800.2940136,-1.634192415,0.088845523,-18.38687954,1.67E-75,8.94E-74,S000004412,URA4,1095,Verified,chrXII,963785,964879,1,"Dihydroorotase; catalyzes the third enzymatic step in the de novo biosynthesis of pyrimidines, converting carbamoyl-L-aspartate into dihydroorotate"
384,YLR430W,1309.399042,-1.054046119,0.070968782,-14.85150243,6.80E-50,1.71E-48,S000004422,SEN1,6696,Verified,chrXII,993434,1000129,1,"ATP-dependent 5' to 3' RNA/DNA and DNA helicase; subunit of the exosome-associated Nrd1p complex that mediates 3' end formation of snRNAs, snoRNAs, CUTs and some mRNAs; helicase-independent role in transcription-coupled repair; coordinates replication with transcription, associating with moving forks and preventing errors that occur when forks encounter transcribed regions; homolog of Senataxin, implicated in Ataxia-Oculomotor Apraxia 2 and a dominant form of juvenile ALS"
385,YLR432W,4129.143631,-1.616290786,0.156549354,-10.32575682,5.39E-25,5.29E-24,S000004424,IMD3,1572,Verified,chrXII,1002557,1004128,1,"Inosine monophosphate dehydrogenase; catalyzes the rate-limiting step in the de novo synthesis of GTP; member of a four-gene family in S. cerevisiae, constitutively expressed; IMD3 has a paralog, IMD4, that arose from the whole genome duplication"
386,YLR435W,171.2876865,-1.302575017,0.15341408,-8.482524203,2.20E-17,1.48E-16,S000004427,TSR2,618,Verified,chrXII,1006378,1006995,1,Protein with a potential role in pre-rRNA processing
387,YLR437C-A,29.51325468,-1.058210128,0.28953501,-3.619155373,0.000295566,0.0006383,S000028684,YLR437C-A,228,Dubious,chrXII,1012459,1012686,-1,"Dubious open reading frame; unlikely to encode a functional protein, based on available experimental and comparative sequence data; partially overlaps the verified ORF CAR2/YLR438W"
388,YLR438W,387.9321508,-1.11064012,0.182914897,-6.065490405,1.32E-09,5.06E-09,S000004430,CAR2,1275,Verified,chrXII,1012501,1013775,1,"L-ornithine transaminase (OTAse); catalyzes the second step of arginine degradation, expression is dually-regulated by allophanate induction and a specific arginine induction process; not nitrogen catabolite repression sensitive; protein abundance increases in response to DNA replication stress; human homolog OAT complements yeast null mutant"
389,YLR449W,777.249446,-2.381751842,0.165863432,-14.35044636,1.06E-46,2.41E-45,S000004441,FPR4,1179,Verified,chrXII,1030834,1032012,1,"Peptidyl-prolyl cis-trans isomerase (PPIase); nuclear proline isomerase; affects expression of multiple genes via its role in nucleosome assembly; catalyzes isomerization of proline residues in histones H3 and H4, which affects lysine methylation of those histones; PPIase domain acts as a transcriptional repressor when tethered to DNA by lexA, and repressor activity is dependent on PPIase activity; contains a nucleoplasmin-like fold and can form pentamers"
390,YML009W-B,108.650464,-1.17938586,0.168293168,-6.998137098,2.59E-12,1.25E-11,S000004471,YML009W-B,477,Dubious,chrXIII,250435,250911,1,"Dubious open reading frame; unlikely to encode a functional protein, based on available experimental and comparative sequence data; deletion mutation confers an increase in Ty1 transposition"
391,YML010W,1261.874249,-1.24636945,0.105519595,-11.81083819,3.43E-32,4.78E-31,S000004470,SPT5,3192,Verified,chrXIII,247677,250868,1,"Spt4p/5p (DSIF) transcription elongation factor complex subunit; the Spt4/5 complex binds to ssRNA in a sequence-specific manner, and in concert with RNAP I and II has multiple roles regulating transcriptional elongation, RNA processing, quality control, and transcription-coupled repair; interacts with DNA upstream of RNAPII and the non-template strand of the transcription bubble; Spt5p is the only transcription elongation factor conserved in all domains of life"
392,YML018C,794.7392807,-1.863436553,0.127419688,-14.61986922,2.10E-48,5.08E-47,S000004480,YML018C,1182,Verified,chrXIII,234771,235952,-1,"Protein of unknown function; green fluorescent protein (GFP)-fusion protein localizes to the membrane of the vacuole; physical interaction with Atg27p suggests a possible role in autophagy; YML018C is not an essential gene; relative distribution to the vacuolar membrane decreases upon DNA replication stress; YML018C has a paralog, THI74, that arose from the whole genome duplication"
393,YML022W,1128.803624,-1.118678085,0.126972266,-8.809454547,1.26E-18,9.15E-18,S000004484,APT1,564,Verified,chrXIII,228937,229500,1,"Adenine phosphoribosyltransferase; catalyzes the formation of AMP from adenine and 5-phosphoribosylpyrophosphate; involved in the salvage pathway of purine nucleotide biosynthesis; APT1 has a paralog, APT2, that arose from the whole genome duplication"
394,YML043C,172.1601653,-2.525442479,0.179692545,-13.93372397,3.95E-44,8.46E-43,S000004507,RRN11,1524,Verified,chrXIII,190244,191767,-1,"Component of the core factor (CF) rDNA transcription factor complex; CF is required for transcription of 35S rRNA genes by RNA polymerase I and is composed of Rrn6p, Rrn7p, and Rrn11p"
395,YML060W,90.7500132,-2.733198582,0.205895578,-12.93955056,2.69E-38,4.64E-37,S000004525,OGG1,1131,Verified,chrXIII,151871,153001,1,"Nuclear and mitochondrial glycosylase/lyase; specifically excises 7,8-dihydro-8-oxoguanine residues located opposite cytosine or thymine residues in DNA, repairs oxidative damage to mitochondrial DNA, contributes to UVA resistance"
396,YML074C,1413.477735,-1.000251128,0.179588891,-5.570009634,2.55E-08,8.56E-08,S000004539,FPR3,1236,Verified,chrXIII,120089,121324,-1,"Nucleolar peptidyl-prolyl cis-trans isomerase (PPIase); FK506 binding protein; affects expression of multiple genes via its role in nucleosome assembly; phosphorylated by casein kinase II (Cka1p-Cka2p-Ckb1p-Ckb2p) and dephosphorylated by Ptp1p; PPIase domain acts as a transcriptional repressor when tethered to DNA by lexA, and repressor activity is dependent on PPIase activity; FPR3 has a paralog, FPR4, that arose from the whole genome duplication"
397,YML080W,190.7285156,-1.737559916,0.13219437,-13.10939742,2.91E-39,5.27E-38,S000004545,DUS1,1272,Verified,chrXIII,108806,110077,1,"Dihydrouridine synthase; member of a widespread family of conserved proteins including Smm1p, Dus3p, and Dus4p; modifies pre-tRNA(Phe) at U17"
398,YML082W,364.7288917,-1.257493623,0.094762146,-13.26337674,3.78E-40,7.07E-39,S000004547,YML082W,1950,Uncharacterized,chrXIII,101862,103811,1,"Putative protein predicted to have carbon-sulfur lyase activity; transcriptionally regulated by Upc2p via an upstream sterol response element; green fluorescent protein (GFP)-fusion protein localizes to the nucleus and the cytoplasm; not an essential gene; YML082W has a paralog, STR2, that arose from the whole genome duplication"
399,YML093W,537.3545158,-2.566500398,0.164320342,-15.59392813,8.01E-55,2.41E-53,S000004558,UTP14,2700,Verified,chrXIII,83090,85789,1,Subunit of U3-containing Small Subunit (SSU) processome complex; involved in production of 18S rRNA and assembly of small ribosomal subunit
400,YML109W,220.0553845,-1.134372974,0.112362847,-10.0885125,6.21E-24,5.83E-23,S000004577,ZDS2,2829,Verified,chrXIII,51640,54468,1,"Protein with a role in regulating Swe1p-dependent polarized growth; involved in maintenance of Cdc55p in the cytoplasm where it promotes mitotic entry; interacts with silencing proteins at the telomere; implicated in the mitotic exit network through regulation of Cdc14p localization; ZDS2 has a paralog, ZDS1, that arose from the whole genome duplication"
401,YML113W,176.930548,-1.220890448,0.121522248,-10.03481481,1.07E-23,9.91E-23,S000004581,DAT1,747,Verified,chrXIII,44045,44791,1,DNA binding protein that recognizes oligo(dA).oligo(dT) tracts; Arg side chain in its N-terminal pentad Gly-Arg-Lys-Pro-Gly repeat is required for DNA-binding; relocalizes to the cytosol in response to hypoxia; not essential for viability
402,YML123C,8606.757854,-1.666882057,0.148330389,-11.23416273,2.77E-29,3.40E-28,S000004592,PHO84,1764,Verified,chrXIII,24037,25800,-1,High-affinity inorganic phosphate (Pi) transporter; also low-affinity manganese transporter; regulated by Pho4p and Spt7p; mutation confers resistance to arsenate; exit from the ER during maturation requires Pho86p; cells overexpressing Pho84p accumulate heavy metals but do not develop symptoms of metal toxicity
403,YMR006C,656.8099701,-3.10544002,0.169334634,-18.2996948,8.32E-75,4.30E-73,S000004608,PLB2,2121,Verified,chrXIII,277561,279681,-1,Phospholipase B (lysophospholipase) involved in lipid metabolism; displays transacylase activity in vitro; overproduction confers resistance to lysophosphatidylcholine
404,YMR011W,2050.353349,-5.033482249,0.204215316,-24.55773969,3.58E-133,1.18E-130,S000004613,HXT2,1626,Verified,chrXIII,288079,289704,1,High-affinity glucose transporter of the major facilitator superfamily; expression is induced by low levels of glucose and repressed by high levels of glucose
405,YMR012W,2730.998482,-1.088674562,0.130611383,-8.334549926,7.78E-17,5.09E-16,S000004614,CLU1,3834,Verified,chrXIII,291134,294967,1,Subunit of the eukaryotic translation initiation factor 3 (eIF3); component of unknown function; deletion causes defects in mitochondrial organization but not in growth or translation initiation; can rescue cytokinesis and mitochondrial organization defects of the Dictyostelium cluA- mutant; eIF3 is also involved in programmed stop codon readthrough
406,YMR014W,281.4494976,-1.664764331,0.17480099,-9.517089293,1.78E-21,1.48E-20,S000004616,BUD22,1560,Verified,chrXIII,298868,300427,1,"Protein required for rRNA maturation and ribosomal subunit biogenesis; required for 18S rRNA maturation; also required for small ribosomal subunit biogenesis; cosediments with pre-ribosomal particles; mutation decreases efficiency of +1 Ty1 frameshifting and transposition, and affects budding pattern"
407,YMR049C,874.9856142,-2.82701883,0.141538878,-19.94987956,1.50E-88,1.25E-86,S000004652,ERB1,2424,Verified,chrXIII,368094,370517,-1,Constituent of 66S pre-ribosomal particles; forms a complex with Nop7p and Ytm1p that is required for maturation of the large ribosomal subunit; required for maturation of the 25S and 5.8S ribosomal RNAs; homologous to mammalian Bop1
408,YMR069W,23.26834284,-1.152079745,0.299932698,-3.815228268,0.000136057,0.00030753,S000004673,NAT4,858,Verified,chrXIII,407709,408566,1,N alpha-acetyl-transferase; involved in acetylation of the N-terminal residues of histones H4 and H2A
409,YMR070W,305.9851745,-1.105028468,0.120815325,-9.143740535,6.03E-20,4.67E-19,S000004674,MOT3,1473,Verified,chrXIII,409154,410626,1,"Transcriptional repressor, activator; role in cellular adjustment to osmotic stress including modulation of mating efficiency; involved in repression of subset of hypoxic genes by Rox1p, repression of several DAN/TIR genes during aerobic growth, ergosterol biosynthetic genes in response to hyperosmotic stress; contributes to recruitment of Tup1p-Cyc8p general repressor to promoters; relocalizes to cytosol under hypoxia; forms [MOT3+] prion under anaerobic conditions"
410,YMR076C,438.1878317,-1.685183671,0.13202187,-12.75608297,2.88E-37,4.77E-36,S000004681,PDS5,3834,Verified,chrXIII,416196,420029,-1,Cohesion maintenance factor; involved in sister chromatid condensation and cohesion; colocalizes with cohesin on chromosomes; performs its cohesin maintenance function in pre-anaphase cells by protecting the integrity of the cohesion complex; also required during meiosis; relocalizes to the cytosol in response to hypoxia
411,YMR093W,598.8026991,-2.299612339,0.10981087,-20.91618506,3.81E-97,4.34E-95,S000004699,UTP15,1542,Verified,chrXIII,454015,455556,1,Nucleolar protein; component of the small subunit (SSU) processome containing the U3 snoRNA that is involved in processing of pre-18S rRNA
412,YMR128W,612.7425611,-2.513684962,0.13627932,-18.41706797,9.59E-76,5.17E-74,S000004735,ECM16,3804,Verified,chrXIII,523696,527499,1,Essential DEAH-box ATP-dependent RNA helicase specific to U3 snoRNP; predominantly nucleolar in distribution; required for 18S rRNA synthesis
413,YMR131C,967.4804041,-2.084393442,0.118710784,-17.550962,5.85E-69,2.61E-67,S000004738,RRB1,1536,Verified,chrXIII,533163,534698,-1,Specific chaperone for ribosomal protein Rpl3p; binds to nascent Rpl3p during translation; essential gene
414,YMR145C,1992.637932,-2.087339253,0.139252822,-14.98862351,8.71E-51,2.25E-49,S000004753,NDE1,1683,Verified,chrXIII,554793,556475,-1,"Mitochondrial external NADH dehydrogenase; type II NAD(P)H:quinone oxidoreductase that catalyzes the oxidation of cytosolic NADH; Nde1p and Nde2p provide cytosolic NADH to the mitochondrial respiratory chain; NDE1 has a paralog, NDE2, that arose from the whole genome duplication"
415,YMR179W,166.3506279,-1.23978709,0.126484846,-9.790019439,1.24E-22,1.11E-21,S000004791,SPT21,2277,Verified,chrXIII,619858,622134,1,"Protein with a role in transcriptional silencing; required for normal transcription at several loci including HTA2-HTB2 and HHF2-HHT2, but not required at the other histone loci; functionally related to Spt10p; localizes to nuclear foci that become diffuse upon DNA replication stress"
416,YMR185W,329.8425686,-1.135355231,0.098688065,-11.49985604,1.32E-30,1.71E-29,S000004797,RTP1,2946,Verified,chrXIII,629025,631970,1,"Protein required for the nuclear import and biogenesis of RNA pol II; conflicting evidence on whether null mutant is viable with elongated buds, or inviable; interacts with Rpb2, Rpb3, Nup116p, Nup100p and components of the R2TP complex (Rvb1p, Rvb2p, Pih1p); similar to human TMCO7 gene"
417,YMR186W,12700.73125,-1.4654521,0.277291633,-5.279837557,1.29E-07,4.05E-07,S000004798,HSC82,2118,Verified,chrXIII,632355,634472,1,"Cytoplasmic chaperone of the Hsp90 family; plays a role in determining prion variants; redundant in function and nearly identical with Hsp82p, and together they are essential; expressed constitutively at 10-fold higher basal levels than HSP82 and induced 2-3 fold by heat shock; contains two acid-rich unstructured regions that promote the solubility of chaperone-substrate complexes; HSC82 has a paralog, HSP82, that arose from the whole genome duplication"
418,YMR215W,1358.877637,-1.239931784,0.162972873,-7.60706061,2.80E-14,1.56E-13,S000004828,GAS3,1575,Verified,chrXIII,696796,698370,1,"Putative 1,3-beta-glucanosyltransferase; has similarity go other GAS family members; low abundance, possibly inactive member of the GAS family of GPI-containing proteins; localizes to the cell wall; mRNA induced during sporulation"
419,YMR217W,4389.029095,-2.574804941,0.171791617,-14.98892051,8.68E-51,2.25E-49,S000004830,GUA1,1578,Verified,chrXIII,701790,703367,1,"GMP synthase; highly conserved enzyme that catalyzes the second step in the biosynthesis of GMP from inosine 5'-phosphate (IMP); transcription is not subject to regulation by guanine but is negatively regulated by nutrient starvation; reduction-of-function mutation gua1-G388D causes changes in cellular guanine nucleotide pools, defects in general protein synthesis, and impaired translation of GCN4 mRNA"
420,YMR229C,1605.947922,-2.54321429,0.116953508,-21.73642326,9.29E-105,1.38E-102,S000004842,RRP5,5190,Verified,chrXIII,725934,731123,-1,RNA binding protein involved in synthesis of 18S and 5.8S rRNAs; component of ribosomal small subunit (SSU) processome and 90S preribosome; required for pre-rRNA packaging and compaction of processome into dense terminal balls; part of Mak21p-Noc2p-Rrp5p module that associates with nascent pre-rRNA during transcription with role in biogenesis of large ribosomal subunit; binds single stranded tracts of U's; relocalizes from nucleolus to nucleus upon DNA replication stress
421,YMR230W-A,4.408067957,-1.772680456,0.486611077,-3.246348002,0.001168959,0.002303287,S000028576,YMR230W-A,189,Uncharacterized,chrXIII,733268,733456,1,Putative protein of unknown function
422,YMR239C,164.9240269,-2.101776346,0.167910288,-12.44572735,1.48E-35,2.29E-34,S000004852,RNT1,1416,Verified,chrXIII,748262,749677,-1,"Nuclear dsRNA-specific ribonuclease (RNase III); involved in rDNA transcription, rRNA processing and U2 snRNA 3' end formation by cleavage of a stem-loop structure at the 3' end of U2 snRNA; involved in polyadenylation-independent transcription termination; involved in the cell wall stress response, regulating the degradation of cell wall integrity and morphogenesis checkpoint genes"
423,YMR246W,2493.739472,-3.281361421,0.169462333,-19.35725628,1.77E-83,1.22E-81,S000004860,FAA4,2085,Verified,chrXIII,759807,761891,1,"Long chain fatty acyl-CoA synthetase; activates fatty acids with a preference for C12:0-C16:0 chain lengths; role in the competitive import of long-chain fatty acids and sphingoid long-chain bases; role in stationary phase survival; localizes to lipid particles and the plasma membrane; role in sphingolipid-to-glycerolipid metabolism; forms cytoplasmic foci upon replication stress; faa1 faa4 double null complemented by any of human ACSBG1, ACSL1, 3, 4, 5, 6, SLC27A2, or 4"
424,YMR259C,772.0076435,-1.206946619,0.081726429,-14.76579799,2.43E-49,6.04E-48,S000004872,TRM732,4263,Verified,chrXIII,784621,788883,-1,"Protein involved in 2'-O-methylation of C32 of substrate tRNAs; interacts with 2'-O-ribose methyltransferase Trm7p; green fluorescent protein (GFP)-fusion protein localizes to the cytoplasm; non-essential gene; yeast null mutant can be functionally complemented by human THADA, mutations in which have been implicated in epithelial thyroid adenomas, type 2 diabetes, and polycystic ovary syndrome (PCOS)"
425,YMR266W,1291.33542,-1.441337771,0.097005441,-14.85641504,6.32E-50,1.60E-48,S000004879,RSN1,2862,Verified,chrXIII,798518,801379,1,Membrane protein of unknown function; overexpression suppresses NaCl sensitivity of sro7 mutant cells by restoring sodium pump (Ena1p) localization to the plasma membrane
426,YMR269W,57.94669026,-1.118324965,0.275456647,-4.058340202,4.94E-05,0.000117353,S000004882,TMA23,636,Verified,chrXIII,804456,805091,1,Nucleolar protein implicated in ribosome biogenesis; deletion extends chronological lifespan
427,YMR290C,933.0524356,-2.878654156,0.187996532,-15.2993751,7.72E-53,2.13E-51,S000004903,HAS1,1518,Verified,chrXIII,850074,851591,-1,ATP-dependent RNA helicase; involved in the biogenesis of 40S and 60S ribosome subunits; localizes to both the nuclear periphery and nucleolus; highly enriched in nuclear pore complex fractions; constituent of 66S pre-ribosomal particles
428,YMR290W-A,60.12517543,-1.275520568,0.213732963,-5.944366796,2.78E-09,1.03E-08,S000004904,YMR290W-A,348,Dubious,chrXIII,851422,851769,1,"Dubious open reading frame; unlikely to encode a functional protein, based on available experimental and comparative sequence data; overlaps 5' end of essential HAS1/YMR290C gene which encodes an ATP-dependent RNA helicase"
429,YMR301C,519.9493633,-1.012579685,0.090241713,-11.21918675,3.28E-29,4.02E-28,S000004916,ATM1,2073,Verified,chrXIII,867555,869627,-1,Mitochondrial inner membrane ATP-binding cassette (ABC) transporter; exports mitochondrially synthesized precursors of iron-sulfur (Fe/S) clusters to the cytosol; human homolog ABCB7 can complement yeast null mutant
430,YMR304C-A,171.9471516,-1.12207939,0.152832422,-7.337602595,2.17E-13,1.13E-12,S000004919,YMR304C-A,351,Dubious,chrXIII,878780,879130,-1,"Dubious open reading frame; unlikely to encode a functional protein, based on available experimental and comparative sequence data; partially overlaps 3' end of verified ORF SCW10/YMR305C"
431,YMR305C,3571.732962,-1.451995216,0.120499759,-12.05005355,1.94E-33,2.85E-32,S000004921,SCW10,1170,Verified,chrXIII,879063,880232,-1,"Cell wall protein with similarity to glucanases; may play a role in conjugation during mating based on mutant phenotype and its regulation by Ste12p; SWC10 has a paralog, SCW4, that arose from the whole genome duplication"
432,YMR307W,12990.19311,-1.683542301,0.134909596,-12.47876071,9.75E-36,1.54E-34,S000004924,GAS1,1680,Verified,chrXIII,887003,888682,1,"Beta-1,3-glucanosyltransferase; required for cell wall assembly and also has a role in transcriptional silencing; localizes to cell surface via a glycosylphosphatidylinositol (GPI) anchor; also found at nuclear periphery; genetic interactions with histone H3 lysine acetyltransferases GCN5 and SAS3 indicate previously unsuspected functions for Gas1 in DNA damage response and cell cycle regulation"
433,YMR309C,2209.924209,-1.277289816,0.093313307,-13.68739575,1.21E-42,2.48E-41,S000004926,NIP1,2439,Verified,chrXIII,892988,895426,-1,eIF3c subunit of the eukaryotic translation initiation factor 3 (eIF3); involved in the assembly of preinitiation complex and start codon selection; eIF3 is also involved in programmed stop codon readthrough
434,YMR310C,384.1955848,-1.584194734,0.100865213,-15.69235946,1.71E-55,5.20E-54,S000004927,YMR310C,954,Uncharacterized,chrXIII,895716,896669,-1,"Putative methyltransferase; predicted to be involved in ribosome biogenesis; green fluorescent protein (GFP)-fusion protein localizes to the nucleus; not an essential gene; YMR310C has a paralog, YGR283C, that arose from the whole genome duplication"
435,YNL002C,532.129247,-1.988006924,0.146733245,-13.53899142,9.20E-42,1.83E-40,S000004947,RLP7,969,Verified,chrXIV,626174,627142,-1,Nucleolar protein similar to large ribosomal subunit L7 proteins; constituent of 66S pre-ribosomal particles; plays an essential role in processing of precursors to the large ribosomal subunit RNAs; binds junction of ITS2 and ITS2-proximal stem between the 3' end of 5.8S rRNA and the 5' end of 25S rRNA
436,YNL061W,900.7065899,-2.365982488,0.105745231,-22.35568889,1.06E-110,2.08E-108,S000005005,NOP2,1857,Verified,chrXIV,510540,512396,1,"rRNA m5C methyltransferase; methylates cytosine at position 2870 of 25S rRNA; has an essential function independent of rRNA methylation; contains seven beta-strand methyltransferase motif; essential for processing and maturation of 27S pre-rRNA and large ribosomal subunit biogenesis; localized to the nucleolus; constituent of 66S pre-ribosomal particles; rRNA methylation defect and lethality are functionally complemented by human NOP2, a gene upregulated in cancer"
437,YNL062C,395.3425174,-1.779814287,0.095880488,-18.53845294,1.01E-76,5.59E-75,S000005006,GCD10,1437,Verified,chrXIV,508776,510212,-1,"Subunit of tRNA (1-methyladenosine) methyltransferase with Gcd14p; required for the modification of the adenine at position 58 in tRNAs, especially tRNAi-Met; first identified as a negative regulator of GCN4 expression"
438,YNL064C,1984.720871,-1.956225209,0.243117634,-8.042797547,8.78E-16,5.42E-15,S000005008,YDJ1,1230,Verified,chrXIV,505868,507097,-1,Type I HSP40 co-chaperone; involved in regulation of HSP90 and HSP70 functions; acts as an adaptor that helps Rsp5p recognize cytosolic misfolded proteins for ubiquitination after heat shock; critical for determining cell size at Start as a function of growth rate; involved in protein translocation across membranes; member of the DnaJ family; chimeric protein in which human p58IPK J domain replaces yeast Ydj1p J domain can complement yeast ydj1 mutant
439,YNL065W,1971.417817,-2.674188883,0.130482604,-20.48660188,2.84E-93,2.65E-91,S000005009,AQR1,1761,Verified,chrXIV,503724,505484,1,"Plasma membrane transporter of the major facilitator superfamily; member of the 12-spanner drug:H(+) antiporter DHA1 family; confers resistance to short-chain monocarboxylic acids and quinidine; involved in the excretion of excess amino acids; AQR1 has a paralog, QDR1, that arose from the whole genome duplication; relocalizes from plasma membrane to cytoplasm upon DNA replication stress"
440,YNL075W,268.2152501,-1.527830971,0.134423205,-11.35470352,7.03E-30,8.82E-29,S000005019,IMP4,873,Verified,chrXIV,485607,486479,1,Component of the SSU processome; SSU processome is required for pre-18S rRNA processing; interacts with Mpp10p; member of a superfamily of proteins that contain a sigma(70)-like motif and associate with RNAs
441,YNL102W,533.6093484,-1.780233543,0.091892755,-19.35657618,1.79E-83,1.22E-81,S000005046,POL1,4407,Verified,chrXIV,430087,434493,1,Catalytic subunit of the DNA polymerase I alpha-primase complex; required for the initiation of DNA replication during mitotic DNA synthesis and premeiotic DNA synthesis
442,YNL110C,266.6032128,-1.943042664,0.234099001,-8.297506681,1.06E-16,6.91E-16,S000005054,NOP15,663,Verified,chrXIV,417826,418488,-1,Constituent of 66S pre-ribosomal particles; involved in 60S ribosomal subunit biogenesis; localizes to both nucleolus and cytoplasm
443,YNL113W,220.5755686,-1.413191396,0.153137842,-9.21950101,2.98E-20,2.34E-19,S000005057,RPC19,429,Verified,chrXIV,412771,413199,1,RNA polymerase subunit AC19; common to RNA polymerases I and III
444,YNL114C,77.87176826,-1.033997448,0.177104278,-5.8278743,5.61E-09,2.01E-08,S000005058,YNL114C,372,Dubious,chrXIV,412684,413055,-1,"Dubious open reading frame; unlikely to encode a functional protein, based on available experimental and comparative sequence data; completely overlaps the verified ORF RPC19/YNL113W, an RNA polymerase subunit"
445,YNL119W,219.2964698,-1.299521711,0.135669385,-9.570653017,1.06E-21,8.93E-21,S000005063,NCS2,1482,Verified,chrXIV,401040,402521,1,Protein required for uridine thiolation of Lys(UUU) and Glu(UUC) tRNAs; required for the thiolation of uridine at the wobble position of Lys(UUU) and Glu(UUC) tRNAs; has a role in urmylation and in invasive and pseudohyphal growth; inhibits replication of Brome mosaic virus in S. cerevisiae
446,YNL123W,1295.555872,-1.12375897,0.095147287,-11.81016749,3.46E-32,4.81E-31,S000005067,NMA111,2994,Verified,chrXIV,394685,397678,1,"Serine protease and general molecular chaperone; cleaves Roq1p, which modifies the substrate specificity of the Ubr1p Ub-ligase, promoting the stress-induced homeostatically-regulated protein degradation (SHRED) of misfolded and native ER-membrane and cytosolic proteins; chaperone activity involved in the heat stress response; promotes apoptosis through proteolysis of Bir1p; role in lipid homeostasis; mammalian Omi/HtrA2 serine protease family member"
447,YNL132W,1033.715888,-2.739554974,0.156123524,-17.53432085,7.84E-69,3.45E-67,S000005076,KRE33,3171,Verified,chrXIV,375321,378491,1,"Protein required for biogenesis of the small ribosomal subunit; heterozygous mutant shows haploinsufficiency in K1 killer toxin resistance; essential gene; NAT10, the human homolog, implicated in several types of cancer and premature aging."
448,YNL141W,695.6447752,-3.837546029,0.173994016,-21.94452692,9.77E-107,1.61E-104,S000005085,AAH1,1044,Verified,chrXIV,359596,360639,1,Adenine deaminase (adenine aminohydrolase); converts adenine to hypoxanthine; involved in purine salvage; transcriptionally regulated by nutrient levels and growth phase; Aah1p degraded upon entry into quiescence via SCF and the proteasome
449,YNL151C,235.8640344,-1.829740349,0.15199249,-12.01551132,2.95E-33,4.26E-32,S000005095,RPC31,756,Verified,chrXIV,347766,348521,-1,RNA polymerase III subunit C31
450,YNL162W-A,35.85365135,-1.004179318,0.253956135,-3.941478757,8.10E-05,0.000187585,S000007624,YNL162W-A,219,Uncharacterized,chrXIV,330329,330547,1,Putative protein of unknown function; identified by homology
451,YNL163C,703.7615308,-1.000106734,0.081427326,-12.28101993,1.15E-34,1.75E-33,S000005107,RIA1,3333,Verified,chrXIV,326741,330073,-1,"Cytoplasmic GTPase/eEF2-like factor involved in ribosomal biogenesis; with Sdo1p, a guanine nucleotide exchange factor (GEF), promotes release of Tif6p from 60S ribosomal subunits in the cytoplasm so that they can assemble with 40S subunits to generate mature ribosomes; required for quality control check of newly made large ribosomal subunits before they are released into the pool of translating ribosomes"
452,YNL164C,133.3962732,-1.266849348,0.176637288,-7.164536956,7.80E-13,3.89E-12,S000005108,IBD2,1056,Verified,chrXIV,325265,326320,-1,Component of the BUB2-dependent spindle checkpoint pathway; interacts with Bfa1p and functions upstream of Bub2p and Bfa1p
453,YNL166C,202.263969,-1.212813721,0.143926133,-8.420744181,3.74E-17,2.48E-16,S000005110,BNI5,1347,Verified,chrXIV,322219,323565,-1,Linker protein responsible for recruitment of myosin to the bud neck; interacts with the C-terminal extensions of septins Cdc11p and Shs1p and binds Myo1p to promote cytokinesis
454,YNL174W,42.75640418,-2.606793226,0.278084503,-8.960027471,3.25E-19,2.44E-18,S000005118,YNL174W,573,Dubious,chrXIV,308074,308646,1,"Dubious open reading frame; unlikely to encode a functional protein, based on available experimental and comparative sequence data; overlaps the verified gene NOP13/YNL175C"
455,YNL175C,406.7356988,-2.541498585,0.152210364,-16.65437018,2.81E-62,1.03E-60,S000005119,NOP13,1212,Verified,chrXIV,307401,308612,-1,Nucleolar protein found in preribosomal complexes; contains an RNA recognition motif (RRM); relative distribution to the nucleolus increases upon DNA replication stress
456,YNL182C,384.4773038,-2.49402457,0.12226759,-20.33847248,5.87E-92,5.32E-90,S000005126,IPI3,1668,Verified,chrXIV,295960,297627,-1,"Component of the Rix1 complex and pre-replicative complexes (pre-RCs); required for processing of ITS2 sequences from 35S pre-rRNA; component of the pre-60S ribosomal particle with the dynein-related AAA-type ATPase Mdn1p; required for pre-RC formation and maintenance during DNA replication licensing; highly conserved protein which contains several WD40 motifs; IPI3 is an essential gene; other members include Rix1p, Ipi1p, and Ipi3p"
457,YNL186W,904.1417455,-1.076323874,0.076161688,-14.13093816,2.45E-45,5.39E-44,S000005130,UBP10,2379,Verified,chrXIV,289498,291876,1,"Ubiquitin-specific protease, deubiquitinates Ub-protein moieties; interacts with proteins that function in rRNA production and ribosome biogenesis via its intrinsically disordered regions; stabilizes Rpa190p by deubiquitination; controls PCNA deubiquitylation; may regulate silencing by acting on Sir4p; involved in posttranscriptionally regulating Gap1p, possibly other transporters; localized to the nucleolus; null mutant phenotypes are functionally complemented by human USP36"
458,YNL207W,392.8780399,-1.614825061,0.094150696,-17.13406792,8.27E-66,3.38E-64,S000005151,RIO2,1278,Verified,chrXIV,255353,256630,1,Essential serine kinase involved in the processing of 20S pre-rRNA; involved in the processing of the 20S pre-rRNA into mature 18S rRNA; has similarity to Rio1p
459,YNL209W,19497.03155,-1.482533742,0.17738661,-8.358599526,6.35E-17,4.17E-16,S000005153,SSB2,1842,Verified,chrXIV,252059,253900,1,"Cytoplasmic ATPase that is a ribosome-associated molecular chaperone; functions with J-protein partner Zuo1p; may be involved in the folding of newly-synthesized polypeptide chains; member of the HSP70 family; SSB2 has a paralog, SSB1, that arose from the whole genome duplication"
460,YNL232W,257.8972613,-1.070180535,0.103479284,-10.33630566,4.83E-25,4.75E-24,S000005176,CSL4,879,Verified,chrXIV,214923,215801,1,"Exosome non-catalytic core component; involved in 3'-5' RNA processing and degradation in both the nucleus and the cytoplasm; predicted to contain an S1 RNA binding domain; human homolog EXOSC1 partially complements yeast csl4 null mutant, and can complement inviability of strain in which expression of CSL4 is repressed"
461,YNL234W,162.6845818,-1.485553609,0.138505666,-10.70095611,1.01E-26,1.11E-25,S000005178,YNL234W,1281,Verified,chrXIV,210233,211513,1,Protein of unknown function with similarity to globins; has a functional heme-binding domain; mutant has aneuploidy tolerance; transcription induced by stress conditions; may be involved in glucose signaling or metabolism; regulated by Rgt1
462,YNL248C,777.6546859,-1.980628018,0.118062886,-16.76766018,4.21E-63,1.58E-61,S000005192,RPA49,1248,Verified,chrXIV,181361,182608,-1,RNA polymerase I subunit A49; essential for nucleolar assembly and for high polymerase loading rate; required for nucleolar localization of Rpa34p
463,YNL262W,951.1304158,-1.227024273,0.068403635,-17.93522902,6.26E-72,2.99E-70,S000005206,POL2,6669,Verified,chrXIV,148212,154880,1,Catalytic subunit of DNA polymerase (II) epsilon; a chromosomal DNA replication polymerase that exhibits processivity and proofreading exonuclease activity; participates in leading-strand synthesis during DNA replication; also involved in DNA synthesis during DNA repair; interacts extensively with Mrc1p
464,YNL278W,371.9841052,-1.008093693,0.093259184,-10.80714772,3.18E-27,3.56E-26,S000005222,CAF120,3183,Verified,chrXIV,113271,116453,1,"Part of the CCR4-NOT transcriptional regulatory complex; involved in controlling mRNA initiation, elongation, and degradation; contains a PH-like domain; CAF120 has a paralog, SKG3, that arose from the whole genome duplication"
465,YNL292W,237.7455527,-1.587914614,0.13875854,-11.42942731,2.98E-30,3.78E-29,S000005236,PUS4,1212,Verified,chrXIV,82806,84017,1,"Pseudouridine synthase; catalyzes only the formation of pseudouridine-55 (Psi55), a highly conserved tRNA modification, in mitochondrial and cytoplasmic tRNAs; also responsible for pseudouracil modification of some mRNAs; PUS4 overexpression leads to translational derepression of GCN4 (Gcd- phenotype)"
466,YNL299W,177.8922884,-2.16042804,0.159206776,-13.50033476,1.56E-41,3.05E-40,S000005243,TRF5,1929,Verified,chrXIV,66517,68445,1,"Non-canonical poly(A) polymerase; involved in nuclear RNA degradation as a component of the TRAMP complex; catalyzes polyadenylation of hypomodified tRNAs, and snoRNA and rRNA precursors; overlapping but non-redundant functions with Pap2p"
467,YNL300W,634.0568086,-1.727265869,0.16249297,-10.62463861,2.29E-26,2.46E-25,S000005244,TOS6,309,Uncharacterized,chrXIV,65744,66052,1,Glycosylphosphatidylinositol-dependent cell wall protein; expression is periodic and decreases in respone to ergosterol perturbation or upon entry into stationary phase; depletion increases resistance to lactic acid
468,YNL308C,551.1954294,-1.747007456,0.187647742,-9.308667505,1.29E-20,1.03E-19,S000005252,KRI1,1776,Verified,chrXIV,54122,55897,-1,Essential nucleolar protein required for 40S ribosome biogenesis; associate with snR30; physically and functionally interacts with Krr1p
469,YNL313C,701.7942786,-1.660947731,0.075545086,-21.97449869,5.05E-107,8.53E-105,S000005257,EMW1,2715,Verified,chrXIV,45308,48022,-1,Essential conserved protein with a role in cell wall integrity; contains six TPR (tetratricopeptide repeat) domains clustered in the C-terminal region; conditional mutant is suppressed by overexpression of GFA1; protein abundance increases in response to DNA replication stress
470,YNR003C,210.7509697,-1.29318162,0.133360451,-9.68856153,3.37E-22,2.92E-21,S000005286,RPC34,954,Verified,chrXIV,634344,635297,-1,RNA polymerase III subunit C34; interacts with TFIIIB70 and is a key determinant in pol III recruitment by the preinitiation complex
471,YNR012W,312.1422955,-1.815931959,0.103303523,-17.54787535,6.17E-69,2.74E-67,S000005295,URK1,1506,Verified,chrXIV,647432,648937,1,"Uridine/cytidine kinase; component of the pyrimidine ribonucleotide salvage pathway that converts uridine into UMP and cytidine into CMP; involved in the pyrimidine deoxyribonucleotide salvage pathway, converting deoxycytidine into dCMP"
472,YNR016C,8123.279957,-1.294349049,0.125843314,-10.28586382,8.16E-25,7.96E-24,S000005299,ACC1,6702,Verified,chrXIV,654673,661374,-1,"Acetyl-CoA carboxylase, biotin containing enzyme; catalyzes carboxylation of cytosolic acetyl-CoA to form malonyl-CoA and regulates histone acetylation by regulating the availablity of acetyl-CoA; required for de novo biosynthesis of long-chain fatty acids; ACC1 has a paralog, HFA1, that arose from the whole genome duplication"
473,YNR038W,504.1759075,-1.350888247,0.088690936,-15.22514554,2.41E-52,6.55E-51,S000005321,DBP6,1890,Verified,chrXIV,695595,697484,1,Essential protein involved in ribosome biogenesis; putative ATP-dependent RNA helicase of the DEAD-box protein family; human homolog DDX51 complements yeast dbp6 mutant
474,YNR043W,1460.759027,-1.037032335,0.133875409,-7.746264189,9.46E-15,5.43E-14,S000005326,MVD1,1191,Verified,chrXIV,701895,703085,1,"Mevalonate pyrophosphate decarboxylase; essential enzyme involved in the biosynthesis of isoprenoids and sterols, including ergosterol; acts as a homodimer"
475,YNR046W,396.8376458,-1.206024942,0.099338483,-12.13630457,6.78E-34,1.01E-32,S000005329,TRM112,408,Verified,chrXIV,707788,708195,1,"Protein involved in methylation of tRNA, rRNA, and translation factors; also involved in ribosome biogenesis; subunit of tRNA methyltransferase (MTase) complexes in combination with Trm9p and Trm11p; N7-methylates G1575 of 18S rRNA as complex with Bud23p; subunit of complex with Mtq2p that methylates Sup45p (eRF1) in the ternary complex eRF1-eRF3-GTP; relative distribution to the nucleus increases upon DNA replication stress; functional homolog of human TRMT112"
476,YNR054C,177.4665539,-1.949184593,0.182220361,-10.66572253,1.47E-26,1.60E-25,S000005337,ESF2,951,Verified,chrXIV,723356,724306,-1,Essential nucleolar protein involved in pre-18S rRNA processing; binds to RNA and stimulates ATPase activity of Dbp8; involved in assembly of the small subunit (SSU) processome
477,YOL002C,578.7574882,-1.135402363,0.087636969,-12.95346409,2.25E-38,3.88E-37,S000005362,IZH2,954,Verified,chrXV,323411,324364,-1,"Plasma membrane receptor for plant antifungal osmotin; involved in zinc ion homeostasis, apoptosis; negatively regulates ZRT1 and other functionally divergent genes through CCCTC promoter motif (IzRE); modulates FET3 activity in iron-independent manner; affects gene expression by influencing balance of competition between Msn2p/Msn4p and Nrg1p/Nrg2p for binding to IzRE; transcription regulated by Zap1p, zinc, fatty acid levels; homolog of mammalian adiponectin receptor"
478,YOL010W,404.1584519,-2.017403714,0.117704941,-17.11356879,1.18E-65,4.74E-64,S000005370,RCL1,1104,Verified,chrXV,307938,309041,1,Endonuclease that cleaves pre-rRNA at site A2 for 18S rRNA biogenesis; subunit of U3-containing 90S preribosome processome complex involved in small ribosomal subunit assembly; stimulates Bms1p GTPase and U3 binding activity; similar to RNA cyclase-like proteins but no cyclase activity detected
479,YOL019W,693.7145377,-1.189629047,0.089642103,-13.26924631,3.49E-40,6.55E-39,S000005379,YOL019W,1656,Uncharacterized,chrXV,288898,290553,1,"Protein of unknown function; green fluorescent protein (GFP)-fusion protein localizes to the cell periphery and vacuole; YOL019W has a paralog, DCV1, that arose from the whole genome duplication"
480,YOL021C,908.4417335,-1.093727821,0.075798811,-14.42770642,3.46E-47,8.11E-46,S000005381,DIS3,3006,Verified,chrXV,282421,285426,-1,"Exosome core complex catalytic subunit; has both endonuclease and 3'-5' exonuclease activity; involved in 3'-5' RNA processing and degradation in both the nucleus and the cytoplasm; role in degradation of tRNAs; similar to E. coli RNase R and to human DIS3, which partially complements dis3-81 heat sensitivity; mutations in Dis3p analogous to human mutations implicated in multiple myeloma impair exosome function; protein abundance increases under to DNA replication stress"
481,YOL022C,359.4920477,-1.216828553,0.117991546,-10.30848077,6.45E-25,6.31E-24,S000005382,TSR4,1227,Verified,chrXV,280272,281498,-1,Cytoplasmic protein required for correct processing of 20S pre-rRNA; protein required for processing of the 20S pre-rRNA at site D to generate mature 18S rRNA; essential gene in S288C background but not in CEN.PK2
482,YOL041C,440.277145,-1.839241959,0.121342,-15.14381343,8.32E-52,2.21E-50,S000005401,NOP12,1380,Verified,chrXV,251267,252646,-1,Nucleolar protein involved in pre-25S rRNA processing; also involved in biogenesis of large 60S ribosomal subunit; contains an RNA recognition motif (RRM); binds to Ebp2; similar to Nop13p and Nsr1p
483,YOL052C,538.2451635,-1.171119694,0.097565284,-12.00131657,3.50E-33,5.01E-32,S000005412,SPE2,1191,Verified,chrXV,232446,233636,-1,S-adenosylmethionine decarboxylase; required for the biosynthesis of spermidine and spermine; cells lacking Spe2p require spermine or spermidine for growth in the presence of oxygen but not when grown anaerobically
484,YOL054W,141.6380946,-1.16593568,0.15019675,-7.755275332,8.82E-15,5.08E-14,S000005415,PSH1,1221,Verified,chrXV,228614,229834,1,"E3 ubiquitin ligase targeting centromere-binding protein Cse4p; mediates polyubiquitination and degradation of histone H3 variant Cse4p, preventing its mislocalization to euchromatin independent of Slx5p; ubiquitination of Cse4p may be antagonized by Scm3p"
485,YOL077C,525.9683841,-2.105938603,0.151126112,-13.92317105,4.58E-44,9.78E-43,S000005437,BRX1,876,Verified,chrXV,185848,186723,-1,Nucleolar protein; constituent of 66S pre-ribosomal particles; depletion leads to defects in rRNA processing and a block in the assembly of large ribosomal subunits; possesses a sigma(70)-like RNA-binding motif
486,YOL079W,17.33141501,-1.822361869,0.341239838,-5.147434053,2.64E-07,8.04E-07,S000005439,YOL079W,399,Dubious,chrXV,181057,181455,1,"Dubious open reading frame; unlikely to encode a functional protein, based on available experimental and comparative sequence data"
487,YOL080C,95.62558226,-2.17909488,0.202056155,-10.67063034,1.40E-26,1.53E-25,S000005440,REX4,870,Verified,chrXV,180558,181427,-1,Putative RNA exonuclease; possibly involved in pre-rRNA processing and ribosome assembly
488,YOL101C,107.7937154,-1.779852951,0.165215487,-10.70879462,9.26E-27,1.02E-25,S000005461,IZH4,939,Verified,chrXV,126982,127920,-1,"Membrane protein involved in zinc ion homeostasis; member of the four-protein IZH family; expression induced by fatty acids and altered zinc levels; deletion reduces sensitivity to excess zinc; possible role in sterol metabolism; protein increases in abundance and relocalizes from nucleus to ER upon DNA replication stress; IZH4 has a paralog, IZH1, that arose from the whole genome duplication"
489,YOL109W,1380.597745,-3.225531365,0.235110226,-13.71134793,8.68E-43,1.79E-41,S000005469,ZEO1,342,Verified,chrXV,110297,110638,1,Peripheral membrane protein of the plasma membrane; interacts with Mid2p; regulates the cell integrity pathway mediated by Pkc1p and Slt2p; the authentic protein is detected in a phosphorylated state in highly purified mitochondria
490,YOL123W,941.2031326,-1.800222622,0.125018026,-14.39637448,5.45E-47,1.27E-45,S000005483,HRP1,1605,Verified,chrXV,87844,89448,1,Subunit of cleavage factor I; cleavage factor I is a five-subunit complex required for the cleavage and polyadenylation of pre-mRNA 3' ends; RRM-containing heteronuclear RNA binding protein and hnRNPA/B family member that binds to poly (A) signal sequences; required for genome stability
491,YOL124C,316.5119588,-2.962748235,0.192109287,-15.34514092,3.82E-53,1.08E-51,S000005484,TRM11,1302,Verified,chrXV,85456,86757,-1,Catalytic subunit of adoMet-dependent tRNA methyltransferase complex; required for the methylation of the guanosine nucleotide at position 10 (m2G10) in tRNAs; contains a THUMP domain and a methyltransferase domain; another complex member is Trm112p
492,YOL125W,255.7425771,-1.211677508,0.109704861,-11.0372668,2.53E-28,2.97E-27,S000005485,TRM13,1431,Verified,chrXV,83834,85264,1,2'-O-methyltransferase; responsible for modification of tRNA at position 4; C-terminal domain has similarity to Rossmann-fold (RFM) superfamily of RNA methyltransferases
493,YOL126C,700.7918516,-1.420295041,0.092630252,-15.32693943,5.05E-53,1.41E-51,S000005486,MDH2,1134,Verified,chrXV,81787,82920,-1,Cytoplasmic malate dehydrogenase; one of three isozymes that catalyze interconversion of malate and oxaloacetate; involved in the glyoxylate cycle and gluconeogenesis during growth on two-carbon compounds; interacts with Pck1p and Fbp1
494,YOL128C,133.9071004,-1.314526578,0.135117005,-9.710658334,2.72E-22,2.36E-21,S000005488,YGK3,1128,Verified,chrXV,78352,79479,-1,"Protein kinase related to mammalian GSK-3 glycogen synthase kinases; GSK-3 homologs (Mck1p, Rim11p, Mrk1p, Ygk3p) are involved in control of Msn2p-dependent transcription of stress responsive genes and in protein degradation; YGK3 has a paralog, MCK1, that arose from the whole genome duplication"
495,YOL136C,848.9622558,-2.060673882,0.143129912,-14.39149161,5.85E-47,1.35E-45,S000005496,PFK27,1194,Verified,chrXV,67561,68754,-1,"6-phosphofructo-2-kinase; catalyzes synthesis of fructose-2,6-bisphosphate; inhibited by phosphoenolpyruvate and sn-glycerol 3-phosphate, expression induced by glucose and sucrose, transcriptional regulation involves protein kinase A"
496,YOL141W,130.2252911,-1.712581859,0.15895851,-10.72881059,7.45E-27,8.25E-26,S000005501,PPM2,2088,Verified,chrXV,56452,58539,1,"AdoMet-dependent tRNA methyltransferase; also involved in methoxycarbonylation; required for the synthesis of wybutosine (yW), a modified guanosine found at the 3'-position adjacent to the anticodon of phe-tRNA; similarity to Ppm1p"
497,YOL144W,178.0968675,-2.159811225,0.155025921,-13.85425205,1.20E-43,2.53E-42,S000005504,NOP8,1455,Verified,chrXV,53098,54552,1,Nucleolar protein required for 60S ribosomal subunit biogenesis
498,YOR001W,548.2322454,-1.43913476,0.08019046,-17.93767253,5.99E-72,2.88E-70,S000005527,RRP6,2202,Verified,chrXV,326832,329033,1,"Nuclear exosome exonuclease component; has 3'-5' exonuclease activity that is regulated by Lrp1p; involved in RNA processing, maturation, surveillance, degradation, tethering, and export; role in sn/snoRNAs precursor degradation; forms a stable heterodimer with Lrp1p; has similarity to E. coli RNase D and to human PM-Sc1 100 (EXOSC10); mutant displays reduced transcription elongation in the G-less-based"
499,YOR004W,196.7355402,-2.457349804,0.162371693,-15.03452495,4.36E-51,1.15E-49,S000005530,UTP23,765,Verified,chrXV,333592,334356,1,"Component of the small subunit processome; involved in 40S ribosomal subunit biogenesis; interacts with snR30 and is required for dissociation of snR30 from large pre-ribosomal particles; has homology to PINc domain protein Fcf1p, although the PINc domain of Utp23p is not required for function; essential protein"
500,YOR008C-A,14.2880026,-1.125203695,0.361023208,-3.085374544,0.00203296,0.003859722,S000006431,YOR008C-A,225,Uncharacterized,chrXV,342857,343081,-1,Putative protein of unknown function; includes a potential transmembrane domain; deletion results in slightly lengthened telomeres; SWAT-GFP and mCherry fusion proteins localize to the endoplasmic reticulum and vacuole respectively
501,YOR021C,357.3715976,-1.239643425,0.134072643,-9.241865337,2.42E-20,1.91E-19,S000005547,SFM1,642,Verified,chrXV,372798,373439,-1,SPOUT methyltransferase; catalyzes omega-monomethylation of Rps3p on Arg-146; not an essential gene; predicted to be involved in rRNA processing and ribosome biogenesis and in biopolymer catabolism
502,YOR027W,1811.5785,-1.213863557,0.236743546,-5.125688856,2.96E-07,8.98E-07,S000005553,STI1,1770,Verified,chrXV,381053,382822,1,"Hsp90 cochaperone; regulates spatial organization of amyloid-like proteins in the cytosol, thereby buffering the proteotoxicity caused by amyloid-like proteins; interacts with the Ssa group of the cytosolic Hsp70 chaperones and activates Ssa1p ATPase activity; interacts with Hsp90 chaperones and inhibits their ATPase activity; homolog of mammalian Hop"
503,YOR056C,322.6733055,-2.079439615,0.141652006,-14.65019434,1.34E-48,3.29E-47,S000005582,NOB1,1380,Verified,chrXV,430247,431626,-1,"Protein involved in proteasomal and 40S ribosomal subunit biogenesis; required for cleavage of the 20S pre-rRNA to generate the mature 18S rRNA; cleavage is activated by Fun12p, a GTPase and translation initiation factor; relocalizes from nucleus to nucleolus upon DNA replication stress"
504,YOR073W-A,20.32356313,-1.089389789,0.324260557,-3.328198448,0.000874096,0.001756621,S000028583,YOR073W-A,234,Dubious,chrXV,467390,467623,1,"Dubious open reading frame; unlikely to encode a functional protein, based on available experimental and comparative sequence data; partially/completely overlaps the verified ORF CDC21/YOR074C; identified by RT-PCR"
505,YOR074C,201.2310454,-1.222817048,0.176209408,-6.935065913,4.06E-12,1.92E-11,S000005600,CDC21,915,Verified,chrXV,466675,467589,-1,Thymidylate synthase; required for de novo biosynthesis of pyrimidine deoxyribonucleotides; expression is induced at G1/S; human homolog TYMSOS can complement yeast cdc21 temperature-sensitive mutant at restrictive temperature
506,YOR091W,314.1663319,-1.879975773,0.148103903,-12.67738505,7.89E-37,1.30E-35,S000005617,TMA46,1038,Verified,chrXV,493433,494470,1,Protein of unknown function that associates with translating ribosomes; interacts with GTPase Rbg1p
507,YOR095C,390.0478033,-2.352299389,0.156559865,-14.99674567,7.71E-51,2.01E-49,S000005621,RKI1,777,Verified,chrXV,503552,504328,-1,Ribose-5-phosphate ketol-isomerase; catalyzes the interconversion of ribose 5-phosphate and ribulose 5-phosphate in the pentose phosphate pathway; participates in pyridoxine biosynthesis
508,YOR101W,434.2005789,-2.167718515,0.190098483,-11.39229188,4.57E-30,5.78E-29,S000005627,RAS1,930,Verified,chrXV,515244,516173,1,"GTPase involved in G-protein signaling in adenylate cyclase activation; plays a role in cell proliferation; localized to the plasma membrane; homolog of mammalian RAS proto-oncogenes; relative distribution to the nucleus increases upon DNA replication stress; RAS1 has a paralog, RAS2, that arose from the whole genome duplication"
509,YOR116C,1510.406233,-1.316966691,0.095166446,-13.83776202,1.51E-43,3.18E-42,S000005642,RPO31,4383,Verified,chrXV,539763,544145,-1,RNA polymerase III largest subunit C160; part of core enzyme; similar to bacterial beta-prime subunit and to RPA190 and RPO21
510,YOR119C,270.1174032,-1.289106777,0.125375378,-10.27560774,9.08E-25,8.83E-24,S000005645,RIO1,1455,Verified,chrXV,548792,550246,-1,Serine kinase involved in cell cycle regulation and rDNA integrity; associated with late pre-40S particles via its conserved C-terminal domain and participates in late 40S biogenesis; association with pre-40S particles regulated by its catalytic ATPase site and likely occurs after the release of Rio2p from these particles; involved in cell cycle progression and processing of the 20S pre-rRNA into mature 18S rRNA; phosphorylates Rpa43p in anaphase to remove Pol I from rDNA
511,YOR140W,382.8442115,-1.063224236,0.125329702,-8.482075308,2.21E-17,1.48E-16,S000005666,SFL1,2301,Verified,chrXV,586981,589281,1,"Transcriptional repressor and activator; involved in repression of flocculation-related genes, and activation of stress responsive genes; has direct role in INO1 transcriptional memory; negatively regulated by cAMP-dependent protein kinase A subunit Tpk2p; premature stop codon (C1430T, Q477-stop) in SK1 background is linked to the aggressively invasive phenotype of SK1 relative to BY4741 (S288C)"
512,YOR144C,156.4918241,-1.169173233,0.133908227,-8.721832807,2.74E-18,1.94E-17,S000005670,ELG1,2376,Verified,chrXV,602717,605092,-1,Subunit of an alternative replication factor C complex; important for DNA replication and genome integrity; suppresses spontaneous DNA damage; involved in homologous recombination-mediated repair and telomere homeostasis; required for PCNA (Pol30p) unloading during DNA replication
513,YOR145C,468.889103,-1.679582074,0.10537479,-15.92733254,4.09E-57,1.29E-55,S000005671,PNO1,825,Verified,chrXV,605347,606171,-1,"Essential nucleolar protein required for pre-18S rRNA processing; interacts with Dim1p, an 18S rRNA dimethyltransferase, and also with Nob1p, which is involved in proteasome biogenesis; contains a KH domain"
514,YOR146W,54.69550934,-1.689423982,0.209429755,-7.990842902,1.34E-15,8.17E-15,S000005672,YOR146W,306,Dubious,chrXV,605873,606178,1,"Dubious open reading frame; unlikely to encode a functional protein, based on available experimental and comparative sequence data; open reading frame overlaps the verified gene PNO1/YOR145C"
515,YOR168W,1834.776898,-1.616618515,0.141231653,-11.44533143,2.48E-30,3.17E-29,S000005694,GLN4,2430,Verified,chrXV,649303,651732,1,Glutamine tRNA synthetase; monomeric class I tRNA synthetase that catalyzes the specific glutaminylation of tRNA(Gln); N-terminal domain proposed to be involved in enzyme-tRNA interactions
516,YOR169C,82.6519755,-1.570663093,0.182294844,-8.575426376,9.87E-18,6.74E-17,S000005695,YOR169C,465,Dubious,chrXV,651376,651840,-1,"Dubious open reading frame; unlikely to encode a functional protein, based on available experimental and comparative sequence data; open reading frame overlaps the verified gene GLN4/YOR168W"
517,YOR204W,3513.014514,-1.538893632,0.128848581,-11.94351698,7.02E-33,1.00E-31,S000005730,DED1,1815,Verified,chrXV,722911,724725,1,"ATP-dependent DEAD (Asp-Glu-Ala-Asp)-box RNA helicase; required for translation initiation of all yeast mRNAs; binds to mRNA cap-associated factors, and binding stimulates Ded1p RNA-dependent ATPase activity; mutation in human homolog DBY is associated with male infertility; human homolog DDX3X complements ded1 null mutation; DED1 has a paralog, DBP1, that arose from the whole genome duplication"
518,YOR206W,856.2135172,-2.061269044,0.10781373,-19.10837705,2.15E-81,1.40E-79,S000005732,NOC2,2133,Verified,chrXV,727512,729644,1,Protein involved in ribosome biogenesis; forms a nucleolar complex with Mak21p that binds to 90S and 66S pre-ribosomes; forms a nuclear complex with Noc3p that binds to 66S pre-ribosomes; both complexes mediate intranuclear transport of ribosomal precursors; acts as part of a Mak21p-Noc2p-Rrp5p module that associates with nascent pre-rRNA during transcription and has a role in bigenesis of the large ribosomal subunit
519,YOR207C,1075.269876,-1.195600687,0.072963108,-16.38452726,2.47E-60,8.76E-59,S000005733,RET1,3450,Verified,chrXV,730008,733457,-1,"Second-largest subunit of RNA polymerase III; RNA polymerase III is responsible for the transcription of tRNA and 5S RNA genes, and other low molecular weight RNAs"
520,YOR252W,113.7459078,-1.600669427,0.199025232,-8.019829392,1.06E-15,6.52E-15,S000005778,TMA16,537,Verified,chrXV,803667,804203,1,Protein of unknown function that associates with ribosomes
521,YOR271C,1168.56938,-1.142357926,0.128218434,-8.909031568,5.15E-19,3.83E-18,S000005797,FSF1,984,Uncharacterized,chrXV,831059,832042,-1,Putative protein; predicted to be an alpha-isopropylmalate carrier; belongs to the sideroblastic-associated protein family; non-tagged protein is detected in purified mitochondria; likely to play a role in iron homeostasis
522,YOR272W,529.0892961,-2.517595213,0.154417739,-16.27995141,1.37E-59,4.78E-58,S000005798,YTM1,1383,Verified,chrXV,832813,834195,1,"Ribosomal assembly factor and 66S pre-ribosomal particle constituent; subunit of the Nop7-subcomplex (PeBoW complex), required for an early nucleolar step in pre-60S ribosomal particle maturation; interaction of its ubiquitin-like (UBL) domain with the MIDAS domain in the Rea1p tail triggers release of the subcomplex and possibly other biogenesis factors via cycles of ATP hydrolysis; involved in the processing of 27S pre-rRNA; contains an N-terminal UBL domain and seven C-terminal WD repeats"
523,YOR287C,69.6444586,-2.290312404,0.305873813,-7.392964587,1.44E-13,7.56E-13,S000005813,RRP36,903,Verified,chrXV,850937,851839,-1,Component of 90S preribosomes; involved in early cleavages of the 35S pre-rRNA and in production of the 40S ribosomal subunit
524,YOR294W,314.1844403,-2.16396056,0.152442598,-14.16711965,1.46E-45,3.26E-44,S000005820,RRS1,612,Verified,chrXV,868340,868951,1,"Essential protein that binds ribosomal protein L11; required for nuclear export of the 60S pre-ribosomal subunit during ribosome biogenesis; localizes to the nucleolus and in foci along nuclear periphery; cooperates with Ebp2p and Mps3p to mediate telomere clustering by binding Sir4p, but is not involved in telomere tethering; mouse homolog shows altered expression in Huntington's disease model mice"
525,YOR309C,230.0752043,-2.323604535,0.210339442,-11.01825746,3.12E-28,3.63E-27,S000005836,YOR309C,381,Dubious,chrXV,896698,897078,-1,"Dubious open reading frame; unlikely to encode a functional protein, based on available experimental and comparative sequence data; partially overlaps the verified gene NOP58"
526,YOR310C,1993.865026,-2.260571959,0.147792791,-15.2931224,8.50E-53,2.33E-51,S000005837,NOP58,1536,Verified,chrXV,896825,898360,-1,"Protein involved in producing mature rRNAs and snoRNAs; involved in pre-rRNA processing, 18S rRNA synthesis, and snoRNA synthesis; component of the small subunit processome complex, which is required for processing of pre-18S rRNA"
527,YOR338W,157.6071135,-1.830744157,0.151331462,-12.0335559,2.37E-33,3.45E-32,S000005865,YOR338W,1092,Uncharacterized,chrXV,956898,957989,1,"Putative protein of unknown function; YOR338W transcription is regulated by Azf1p and its transcript is a specific target of the G protein effector Scp160p; identified as being required for sporulation in a high-throughput mutant screen; YOR338W has a paralog, FUN19, that arose from the whole genome duplication"
528,YOR340C,391.463482,-2.320866192,0.123200336,-18.79240402,8.71E-79,5.04E-77,S000005867,RPA43,981,Verified,chrXV,959202,960182,-1,RNA polymerase I subunit A43
529,YOR341W,2597.306337,-2.516250089,0.133240194,-18.88153546,1.62E-79,9.92E-78,S000005868,RPA190,4995,Verified,chrXV,960987,965981,1,RNA polymerase I largest subunit A190
530,YOR359W,574.4613434,-2.15942207,0.154842293,-13.93629325,3.81E-44,8.19E-43,S000005886,VTS1,1572,Verified,chrXV,1011189,1012760,1,Flap-structured DNA-binding and RNA-binding protein; stimulates deadenylation-dependent mRNA degradation mediated by the CCR4-NOT deadenylase complex; member of the Smaug (Smg) family of post-transcriptional regulators which bind RNA through a conserved sterile alpha motif (SAM) domain that interacts with Smg recognition element (SREs) containing transcripts; stimulates Dna2p endonuclease activity
531,YPL012W,1318.459791,-2.925354618,0.121084228,-24.13736633,1.01E-128,2.53E-126,S000005933,RRP12,3687,Verified,chrXVI,529723,533409,1,Protein required for export of the ribosomal subunits; associates with the RNA components of the pre-ribosomes; has a role in nuclear import in association with Pse1p; also plays a role in the cell cycle and the DNA damage response; contains HEAT-repeats
532,YPL019C,2830.189357,-1.27907226,0.107687995,-11.87606045,1.58E-32,2.23E-31,S000005940,VTC3,2508,Verified,chrXVI,514511,517018,-1,"Regulatory subunit of the vacuolar transporter chaperone (VTC) complex; involved in membrane trafficking, vacuolar polyphosphate accumulation, microautophagy and non-autophagic vacuolar fusion; VTC3 has a paralog, VTC2, that arose from the whole genome duplication"
533,YPL026C,513.5022919,-1.171615212,0.11080907,-10.57118614,4.05E-26,4.30E-25,S000005947,SKS1,1509,Verified,chrXVI,500675,502183,-1,"Putative serine/threonine protein kinase; involved in the adaptation to low concentrations of glucose independent of the SNF3 regulated pathway; SKS1 has a paralog, VHS1, that arose from the whole genome duplication"
534,YPL043W,585.5095069,-2.403407052,0.146970805,-16.33208984,5.84E-60,2.05E-58,S000005964,NOP4,2058,Verified,chrXVI,469939,471996,1,Nucleolar protein; essential for processing and maturation of 27S pre-rRNA and large ribosomal subunit biogenesis; constituent of 66S pre-ribosomal particles; contains four RNA recognition motifs (RRMs)
535,YPL044C,20.07739697,-1.707664263,0.376081836,-4.426653338,9.57E-06,2.46E-05,S000005965,YPL044C,549,Dubious,chrXVI,469926,470474,-1,"Dubious open reading frame; unlikely to encode a functional protein, based on available experimental and comparative sequence data; partially overlaps the verified gene NOP4/YPL043W"
536,YPL057C,677.3870684,-1.302323692,0.10466259,-12.44145257,1.56E-35,2.40E-34,S000005978,SUR1,1149,Verified,chrXVI,451909,453057,-1,"Mannosylinositol phosphorylceramide (MIPC) synthase catalytic subunit; forms a complex with regulatory subunit Csg2p; function in sphingolipid biosynthesis is overlapping with that of Csh1p; SUR1 has a paralog, CSH1, that arose from the whole genome duplication"
537,YPL082C,838.3367939,-1.468601228,0.082711901,-17.75113121,1.69E-70,7.94E-69,S000006003,MOT1,5604,Verified,chrXVI,398480,404083,-1,Essential protein involved in regulation of transcription; removes Spt15p (TBP) from DNA via its C-terminal ATPase activity; may have a role in ensuring that soluble TBP is available to bind TATA-less promoters; forms a complex with TBP that binds TATA DNA with high affinity but with altered specificity; the Mot1p-Spt15p-DNA ternary complex contains unbent DNA; coregulates transcription with Spt16p through assembly of preinitiation complex and organization of nucleosomes
538,YPL086C,443.5953531,-1.693318211,0.106708565,-15.85634238,1.27E-56,3.93E-55,S000006007,ELP3,1674,Verified,chrXVI,384773,386446,-1,Subunit of Elongator complex; Elongator is required for modification of wobble nucleosides in tRNA; exhibits histone acetyltransferase activity that is directed to histones H3 and H4; disruption confers resistance to K. lactis zymotoxin; human homolog ELP3 can partially complement yeast elp3 null mutant
539,YPL093W,1613.764883,-2.747967468,0.130262065,-21.08498738,1.09E-98,1.29E-96,S000006014,NOG1,1944,Verified,chrXVI,370978,372921,1,Putative GTPase; associates with free 60S ribosomal subunits in the nucleolus and is required for 60S ribosomal subunit biogenesis; constituent of 66S pre-ribosomal particles; member of the ODN family of nucleolar G-proteins
540,YPL126W,1163.936678,-2.677041278,0.135493537,-19.74416503,9.00E-87,7.04E-85,S000006047,NAN1,2691,Verified,chrXVI,310210,312900,1,U3 snoRNP protein; component of the small (ribosomal) subunit (SSU) processosome containing U3 snoRNA; required for the biogenesis of18S rRNA
541,YPL146C,297.2963774,-1.718076243,0.206409859,-8.321540313,8.68E-17,5.67E-16,S000006067,NOP53,1368,Verified,chrXVI,276162,277529,-1,Nucleolar protein; involved in biogenesis of the 60S subunit of the ribosome; interacts with rRNA processing factors Cbf5p and Nop2p and with the nucleolar proteins Nop17p and Nip7p; null mutant is viable but growth is severely impaired
542,YPL163C,959.5379194,-1.774160114,0.105405572,-16.82636829,1.56E-63,5.96E-62,S000006084,SVS1,783,Verified,chrXVI,241918,242700,-1,"Cell wall and vacuolar protein; required for wild-type resistance to vanadate; SVS1 has a paralog, SRL1, that arose from the whole genome duplication"
543,YPL183C,757.6190636,-1.588712131,0.076721834,-20.69906913,3.53E-95,3.56E-93,S000006104,RTT10,3042,Verified,chrXVI,199495,202536,-1,WD40 domain-containing protein involved in endosomal recycling; forms a complex with Rrt2p that functions in the retromer-mediated pathway for recycling internalized cell-surface proteins; interacts with Trm7p for 2'-O-methylation of N34 of substrate tRNAs; has a role in regulation of Ty1 transposition; human ortholog is WDR6
544,YPL201C,23.48385914,-1.827533402,0.303014661,-5.852375367,4.85E-09,1.74E-08,S000006122,YIG1,1386,Verified,chrXVI,169770,171155,-1,Protein that interacts with glycerol 3-phosphatase; plays a role in anaerobic glycerol production; localizes to the nucleus and cytosol
545,YPL207W,961.0302477,-1.65104512,0.087205657,-18.927494,6.77E-80,4.23E-78,S000006128,TYW1,2433,Verified,chrXVI,159909,162341,1,Iron-sulfer protein required for synthesis of Wybutosine modified tRNA; Wybutosine is a modified guanosine found at the 3'-position adjacent to the anticodon of phenylalanine tRNA which supports reading frame maintenance by stabilizing codon-anticodon interactions; induction by Yap5p in response to iron provides protection from high iron toxicity; overexpression results in increased cellular iron
546,YPL211W,404.3271129,-2.143955848,0.16341059,-13.10384201,3.13E-39,5.66E-38,S000006132,NIP7,546,Verified,chrXVI,153495,154040,1,Nucleolar protein required for 60S ribosome subunit biogenesis; constituent of 66S pre-ribosomal particles; physically interacts with Nop8p and the exosome subunit Rrp43p
547,YPL217C,891.5182294,-2.039015559,0.108927868,-18.70984184,4.12E-78,2.32E-76,S000006138,BMS1,3552,Verified,chrXVI,139620,143171,-1,"GTPase required for ribosomal subunit synthesis and rRNA processing; required for synthesis of 40S ribosomal subunits and for processing the 35S pre-rRNA at sites A0, A1, and A2; interacts with Rcl1p, which stimulates its GTPase and U3 snoRNA binding activities; has similarity to Tsr1p"
548,YPL220W,8243.954558,-1.172618772,0.163784293,-7.159760495,8.08E-13,4.02E-12,S000006141,RPL1A,654,Verified,chrXVI,135790,136443,1,"Ribosomal 60S subunit protein L1A; N-terminally acetylated; homologous to mammalian ribosomal protein L10A and bacterial L1; RPL1A has a paralog, RPL1B, that arose from the whole genome duplication; rpl1a rpl1b double null mutation is lethal"
549,YPL226W,3500.476063,-1.948993388,0.144088174,-13.52608572,1.10E-41,2.16E-40,S000006147,NEW1,3591,Verified,chrXVI,121767,125357,1,ATP binding cassette protein; cosediments with polysomes and is required for biogenesis of the small ribosomal subunit; Asn/Gln-rich rich region supports [NU+] prion formation and susceptibility to [PSI+] prion induction
550,YPL231W,11397.42364,-1.537619293,0.123160016,-12.48543642,8.97E-36,1.42E-34,S000006152,FAS2,5664,Verified,chrXVI,108652,114315,1,"Alpha subunit of fatty acid synthetase; complex catalyzes the synthesis of long-chain saturated fatty acids; contains the acyl-carrier protein domain and beta-ketoacyl reductase, beta-ketoacyl synthase and self-pantetheinylation activities"
551,YPL245W,242.7830543,-1.438206262,0.101862947,-14.10110136,3.74E-45,8.20E-44,S000006166,YPL245W,1365,Uncharacterized,chrXVI,85586,86950,1,Putative protein of unknown function; green fluorescent protein (GFP)-fusion protein localizes to both the nucleus and the cytoplasm
552,YPL256C,831.8402812,-1.16686219,0.085302976,-13.67648355,1.40E-42,2.86E-41,S000006177,CLN2,1638,Verified,chrXVI,64977,66614,-1,"G1 cyclin involved in regulation of the cell cycle; activates Cdc28p kinase to promote the G1 to S phase transition; late G1 specific expression depends on transcription factor complexes, MBF (Swi6p-Mbp1p) and SBF (Swi6p-Swi4p); CLN2 has a paralog, CLN1, that arose from the whole genome duplication; cell cycle arrest phenotype of the cln1 cln2 cln3 triple null mutant is complemented by any of human cyclins CCNA2, CCNB1, CCNC, CCND1, or CCNE1"
553,YPL263C,545.6215964,-1.781079562,0.110012181,-16.17926727,7.06E-59,2.44E-57,S000006184,KEL3,1956,Verified,chrXVI,44551,46506,-1,Cytoplasmic protein of unknown function
554,YPL266W,328.4349899,-1.869807539,0.13006061,-14.35700761,9.63E-47,2.20E-45,S000006187,DIM1,957,Verified,chrXVI,39121,40077,1,"Essential 18S rRNA dimethylase (dimethyladenosine transferase); responsible for conserved m6(2)Am6(2)A dimethylation in 3'-terminal loop of 18S rRNA, part of 90S and 40S pre-particles in nucleolus, involved in pre-ribosomal RNA processing; human homolog DIMT1 complements yeast dim1 mutant"
555,YPL267W,44.85021022,-1.34436608,0.250047978,-5.347026024,8.94E-08,2.84E-07,S000006188,ACM1,630,Verified,chrXVI,38169,38798,1,"Pseudosubstrate inhibitor of the APC/C; suppresses APC/C [Cdh1]-mediated proteolysis of mitotic cyclins; associates with Cdh1p, Bmh1p and Bmh2p; cell cycle regulated protein; the anaphase-promoting complex/cyclosome is also known as APC/C"
556,YPL274W,815.0825186,-1.399191239,0.120210573,-11.63711775,2.67E-31,3.56E-30,S000006195,SAM3,1764,Verified,chrXVI,22938,24701,1,High-affinity S-adenosylmethionine permease; required for utilization of S-adenosylmethionine as a sulfur source; has similarity to S-methylmethionine permease Mmp1p
557,YPR010C,3747.16804,-2.158591541,0.108217363,-19.94539705,1.64E-88,1.33E-86,S000006214,RPA135,3612,Verified,chrXVI,577585,581196,-1,RNA polymerase I second largest subunit A135
558,YPR016C,1324.889955,-1.214301117,0.105934286,-11.46222823,2.04E-30,2.61E-29,S000006220,TIF6,738,Verified,chrXVI,592332,593069,-1,Constituent of 66S pre-ribosomal particles; has similarity to human translation initiation factor 6 (eIF6); may be involved in the biogenesis and or stability of 60S ribosomal subunits
559,YPR037C,199.3588992,-1.467543542,0.150024477,-9.768613354,1.54E-22,1.36E-21,S000006241,ERV2,591,Verified,chrXVI,646448,647038,-1,Flavin-linked sulfhydryl oxidase localized to the ER lumen; involved in disulfide bond formation within the endoplasmic reticulum (ER)
560,YPR038W,44.19614584,-1.591218949,0.269176426,-5.838127187,5.28E-09,1.89E-08,S000006242,IRC16,360,Dubious,chrXVI,646836,647195,1,"Dubious open reading frame; unlikely to encode a functional protein, based on available experimental and comparative sequence data; partially overlaps verified gene YPR037C; null mutant displays increased levels of spontaneous Rad52p foci"
561,YPR041W,1701.379362,-1.430528828,0.140050699,-10.21345339,1.73E-24,1.66E-23,S000006245,TIF5,1218,Verified,chrXVI,648704,649921,1,Translation initiation factor eIF5; functions both as a GTPase-activating protein to mediate hydrolysis of ribosome-bound GTP and as a GDP dissociation inhibitor to prevent recycling of eIF2
562,YPR080W,45321.04172,-1.342062572,0.1590672,-8.43661266,3.27E-17,2.18E-16,S000006284,TEF1,1377,Verified,chrXVI,700594,701970,1,"Translational elongation factor EF-1 alpha; GTP-bound active form, binds to and delivers aminoacylated tRNA to the A-site of ribosomes for elongation of nascent polypeptides; moonlighting function as an actin binding and bundling protein; association with GTPase Rho1p on the vacuolar membrane may facilitate F-actin remodeling; involved in tRNA re-export from the nucleus"
563,YPR110C,1170.386458,-1.258724302,0.09176062,-13.71584503,8.16E-43,1.69E-41,S000006314,RPC40,1008,Verified,chrXVI,745828,746835,-1,RNA polymerase subunit AC40; common to RNA polymerase I and III; predominant determinant targeting Ty1 integration upstream of Pol III-transcribed genes
564,YPR112C,513.2438914,-3.078601518,0.149561368,-20.49293115,2.49E-93,2.36E-91,S000006316,MRD1,2664,Verified,chrXVI,749256,751919,-1,Essential conserved small ribosomal subunit (40s) synthesis factor; component of the 90S preribosome; required for production of 18S rRNA and small ribosomal subunit; contains five consensus RNA-binding domains and binds to the pre-rRNA at two sites within the 18S region
565,YPR125W,367.4424933,-1.117759223,0.115979714,-9.634765958,5.70E-22,4.88E-21,S000006329,YLH47,1365,Verified,chrXVI,787961,789325,1,"Mitochondrial inner membrane protein; exposed to the mitochondrial matrix; associates with mitochondrial ribosomes; NOT required for respiratory growth; homolog of human Letm1, a protein implicated in Wolf-Hirschhorn syndrome"
566,YPR136C,26.76393979,-1.69210316,0.274466772,-6.035668268,1.58E-09,6.02E-09,S000006340,YPR136C,513,Dubious,chrXVI,802325,802837,-1,"Dubious open reading frame; unlikely to encode a functional protein, based on available experimental and comparative sequence data; partially overlaps verified ORF RRP9"
567,YPR137W,435.2450368,-1.918640416,0.119101837,-16.0920547,2.90E-58,9.59E-57,S000006341,RRP9,1722,Verified,chrXVI,802359,804080,1,Protein involved in pre-rRNA processing; associated with U3 snRNP; component of small ribosomal subunit (SSU) processosome; ortholog of the human U3-55k protein
568,YPR141C,134.153396,-1.029639969,0.153914572,-6.6846845,2.31E-11,1.03E-10,S000006345,KAR3,2190,Verified,chrXVI,815734,817923,-1,"Minus-end-directed microtubule motor; functions in mitosis and meiosis, localizes to the spindle pole body and localization is dependent on functional Cik1p, required for nuclear fusion during mating; potential Cdc28p substrate"
569,YPR142C,20.81553625,-1.488693221,0.366586032,-4.015251265,5.94E-05,0.000139571,S000006346,YPR142C,564,Dubious,chrXVI,818130,818693,-1,"Dubious open reading frame; unlikely to encode a functional protein, based on available experimental and comparative sequence data; partially overlaps the verified ORF RRP15, which is required for ribosomal RNA processing"
570,YPR143W,143.3574713,-1.724563509,0.203981327,-8.435603644,3.29E-17,2.19E-16,S000006347,RRP15,753,Verified,chrXVI,818323,819075,1,Nucleolar protein; constituent of pre-60S ribosomal particles; required for proper processing of the 27S pre-rRNA at the A3 and B1 sites to yield mature 5.8S and 25S rRNAs
571,YPR144C,578.9998447,-1.741096109,0.083526659,-20.82886993,2.37E-96,2.60E-94,S000006348,NOC4,1659,Verified,chrXVI,819765,821423,-1,Nucleolar protein; forms a complex with Nop14p that mediates maturation and nuclear export of 40S ribosomal subunits; relocalizes to the cytosol in response to hypoxia
572,YPR156C,1425.42228,-1.452999977,0.102631108,-14.15744545,1.68E-45,3.72E-44,S000006360,TPO3,1869,Verified,chrXVI,837909,839777,-1,"Polyamine transporter of the major facilitator superfamily; member of the 12-spanner drug:H(+) antiporter DHA1 family; specific for spermine; localizes to the plasma membrane; TPO3 has a paralog, TPO2, that arose from the whole genome duplication"
573,YPR157W,143.9717492,-1.209861044,0.157305016,-7.682880583,1.56E-14,8.81E-14,S000006361,TDA6,1404,Uncharacterized,chrXVI,841266,842669,1,"Putative protein of unknown function; induced by treatment with 8-methoxypsoralen and UVA irradiation; null mutant is sensitive to expression of the top1-T722A allele; SWAT-GFP and mCherry fusion proteins localize to the cell periphery and vacuole; TDA6 has a paralog, VPS62, that arose from the whole genome duplication"
574,YPR163C,2202.189649,-1.463428773,0.126225321,-11.59326382,4.46E-31,5.88E-30,S000006367,TIF3,1311,Verified,chrXVI,868645,869955,-1,Translation initiation factor eIF-4B; contains an RNA recognition motif and binds to single-stranded RNA; has RNA annealing activity; interacts with Rps20p at the head of the 40S ribosomal subunit and alters the structure of the mRNA entry channel
575,YPR175W,232.3821421,-1.015316814,0.109652726,-9.254599327,2.15E-20,1.70E-19,S000006379,DPB2,2070,Verified,chrXVI,888974,891043,1,Second largest subunit of DNA polymerase II (DNA polymerase epsilon); required for maintenance of fidelity of chromosomal replication; essential motif in C-terminus is required for formation of the four-subunit Pol epsilon; expression peaks at the G1/S phase boundary; Cdc28p substrate
576,YPR190C,392.2051379,-1.587584387,0.093478489,-16.96761549,1.43E-64,5.61E-63,S000006394,RPC82,1965,Verified,chrXVI,917077,919041,-1,RNA polymerase III subunit C82
